# Supplementary material
Source: PubMed Central journal article supplement (PMC2794409)

## Supporting Information for

### Allenyl Azide Cycloaddition Chemistry. 2,3-Cyclopentennelated Indole Synthesis through Indolidene Intermediates.

*Ken S. Feldman,\*<sup>†</sup> D. Keith Hester, II,<sup>†</sup> Malliga R. Iyer,<sup>†</sup> Paul J. Munson,<sup>†</sup> Carlos Silva López<sup>\*§</sup> and Olalla Nieto Faza<sup>§</sup>*

*Department of Chemistry, The Pennsylvania State University, University Park, Pennsylvania 16802, USA, Departamento de Química Organica, Universidade de Vigo, Lagoas Marcosende, 36200, Vigo, Galicia, Spain, and Department of Chemistry, University of Minnesota, 207 Pleasant St. SE, Minneapolis, Minnesota 55455-0431, USA*

|                                                  |                |
|--------------------------------------------------|----------------|
| <b>General Experimental</b>                      | <b>S2</b>      |
| <b><sup>1</sup>H NMR, <sup>13</sup>C NMR 13i</b> | <b>S3/S4</b>   |
| <b><sup>1</sup>H NMR, <sup>13</sup>C NMR 14j</b> | <b>S5/S6</b>   |
| <b><sup>1</sup>H NMR, <sup>13</sup>C NMR 19</b>  | <b>S7/S8</b>   |
| <b><sup>1</sup>H NMR, <sup>13</sup>C NMR 20</b>  | <b>S9/S10</b>  |
| <b><sup>1</sup>H NMR, <sup>13</sup>C NMR 21</b>  | <b>S11/S12</b> |
| <b><sup>1</sup>H NMR, <sup>13</sup>C NMR 22</b>  | <b>S13/S14</b> |
| <b><sup>1</sup>H NMR, <sup>13</sup>C NMR 23</b>  | <b>S15/S16</b> |
| <b><sup>1</sup>H NMR, <sup>13</sup>C NMR 24</b>  | <b>S17/S18</b> |
| <b><sup>1</sup>H NMR, <sup>13</sup>C NMR 25</b>  | <b>S19/S20</b> |
| <b><sup>1</sup>H NMR, <sup>13</sup>C NMR 27c</b> | <b>S21/S22</b> |
| <b><sup>1</sup>H NMR, <sup>13</sup>C NMR 28c</b> | <b>S23/S24</b> |
| <b><sup>1</sup>H NMR, <sup>13</sup>C NMR 29</b>  | <b>S25/S26</b> |
| <b><sup>1</sup>H NMR, <sup>13</sup>C NMR 30</b>  | <b>S27/S28</b> |
| <b><sup>1</sup>H NMR, <sup>13</sup>C NMR 35c</b> | <b>S29/S30</b> |
| <b><sup>1</sup>H NMR, <sup>13</sup>C NMR 37</b>  | <b>S31/S32</b> |
| <b><sup>1</sup>H NMR, <sup>13</sup>C NMR 38h</b> | <b>S33/S34</b> |
| <b><sup>1</sup>H NMR, <sup>13</sup>C NMR 38i</b> | <b>S35/S36</b> |
| <b><sup>1</sup>H NMR, <sup>13</sup>C NMR 38m</b> | <b>S37/S38</b> |
| <b><sup>1</sup>H NMR, <sup>13</sup>C NMR 39h</b> | <b>S39/S40</b> |
| <b><sup>1</sup>H NMR, <sup>13</sup>C NMR 40g</b> | <b>S41/S42</b> |
| <b><sup>1</sup>H NMR, <sup>13</sup>C NMR 40i</b> | <b>S43/S44</b> |
| <b><sup>1</sup>H NMR, <sup>13</sup>C NMR 40m</b> | <b>S45/S46</b> |

|                                                      |                |
|------------------------------------------------------|----------------|
| <b><sup>1</sup>H NMR, <sup>13</sup>C NMR 42a</b>     | <b>S47/S48</b> |
| <b><sup>1</sup>H NMR, <sup>13</sup>C NMR 42f</b>     | <b>S49/S50</b> |
| <b><sup>1</sup>H NMR, <sup>13</sup>C NMR 42g</b>     | <b>S51/S52</b> |
| <b><sup>1</sup>H NMR, <sup>13</sup>C NMR 43e</b>     | <b>S53/S54</b> |
| <b><sup>1</sup>H NMR, <sup>13</sup>C NMR 45e</b>     | <b>S55/S56</b> |
| <b><sup>1</sup>H NMR, <sup>13</sup>C NMR 46</b>      | <b>S57/S58</b> |
| <b><sup>1</sup>H NMR, <sup>13</sup>C NMR 47</b>      | <b>S59/S60</b> |
| <b><sup>1</sup>H NMR, <sup>13</sup>C NMR 58b</b>     | <b>S61/S62</b> |
| <b><sup>1</sup>H NMR, <sup>13</sup>C NMR 59</b>      | <b>S63/S64</b> |
| <b><sup>1</sup>H NMR, <sup>13</sup>C NMR 60</b>      | <b>S65/S66</b> |
| <b><sup>1</sup>H NMR, <sup>13</sup>C NMR 61</b>      | <b>S67/S68</b> |
| <b>X-ray Structure 39n</b>                           | <b>S69</b>     |
| <b>X-ray Structure 40a</b>                           | <b>S71</b>     |
| <b>X-ray Structure 42b</b>                           | <b>S73</b>     |
| <b>X-ray Structure 42d</b>                           | <b>S75</b>     |
| <b>X-ray Structure 43e</b>                           | <b>S77</b>     |
| <b>X-ray Structure 54</b>                            | <b>S79</b>     |
| <b>2-D Energy Profile for the 64 → 67 conversion</b> | <b>S81</b>     |

### **General Experimental**

Moisture and oxygen sensitive reactions were carried out in flame-dried glassware under a nitrogen atmosphere. Photolysis was carried out using a Rayonet reactor with cooling fan. Solvents were dried by passage through an activated alumina column under nitrogen. All organic reagents were used as purchased unless otherwise noted. Flash chromatography was performed using 32 – 63 μm silica gel (unless otherwise noted) with the indicated solvent systems. Melting points are uncorrected.

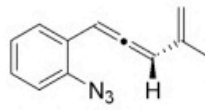

**13i**

DKH4-260 Product pale yellow oil

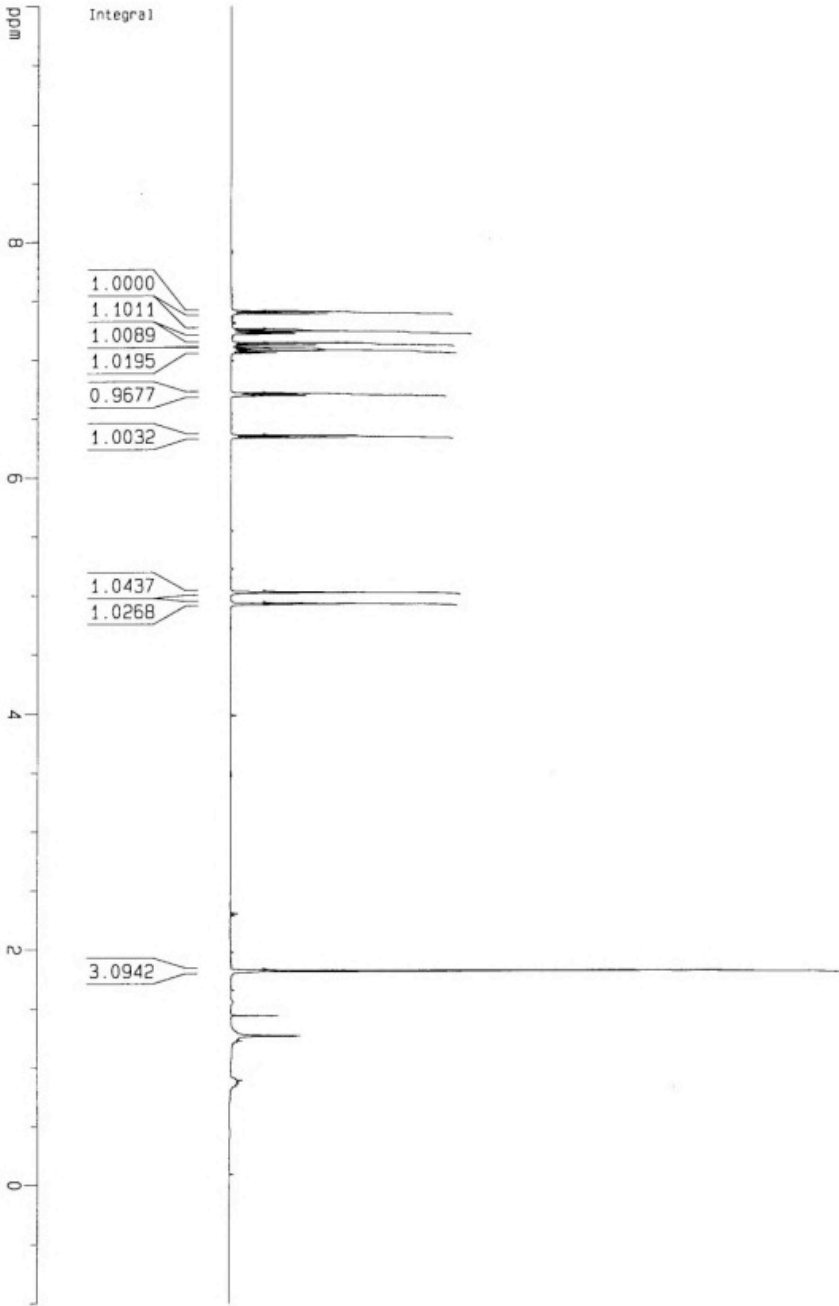

```

Current Data Parameters
NAME      DKH4-260P
EXPNO    1
PROCNO   1

F2 - Acquisition Parameters
Date_    20070528
Time     10.51
INSTRUM spect
PROBHD   5 mm BBI 1H-B
PULPROG zg30
TD       65536
SOLVENT  CDCl3
NS       12
DS       2
SWH      8278.146 Hz
FIDRES   0.126314 Hz
AQ       3.9584243 sec
RG       71.8
DM       60.400 usec
DE       6.00 usec
TE       300.0 K
D1       1.00000000 sec

----- CHANNEL f1 -----
NUC1     1H
P1       6.45 usec
PL1     0.00 dB
SF01    400.1324710 MHz

F2 - Processing parameters
SI       32768
SF       400.1300174 MHz
WDW      no
SSB      0
LB       0.00 Hz
GB       0
PC       1.00

1D NMR plot parameters
CX       20.00 cm
F1P     10.000 ppm
F1      4001.30 Hz
F2P     -1.000 ppm
F2      -400.13 Hz
PPMCM   0.55000 ppm/cm
HZCM    220.07150 Hz/cm
  
```

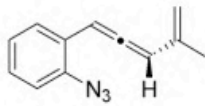

**13i**

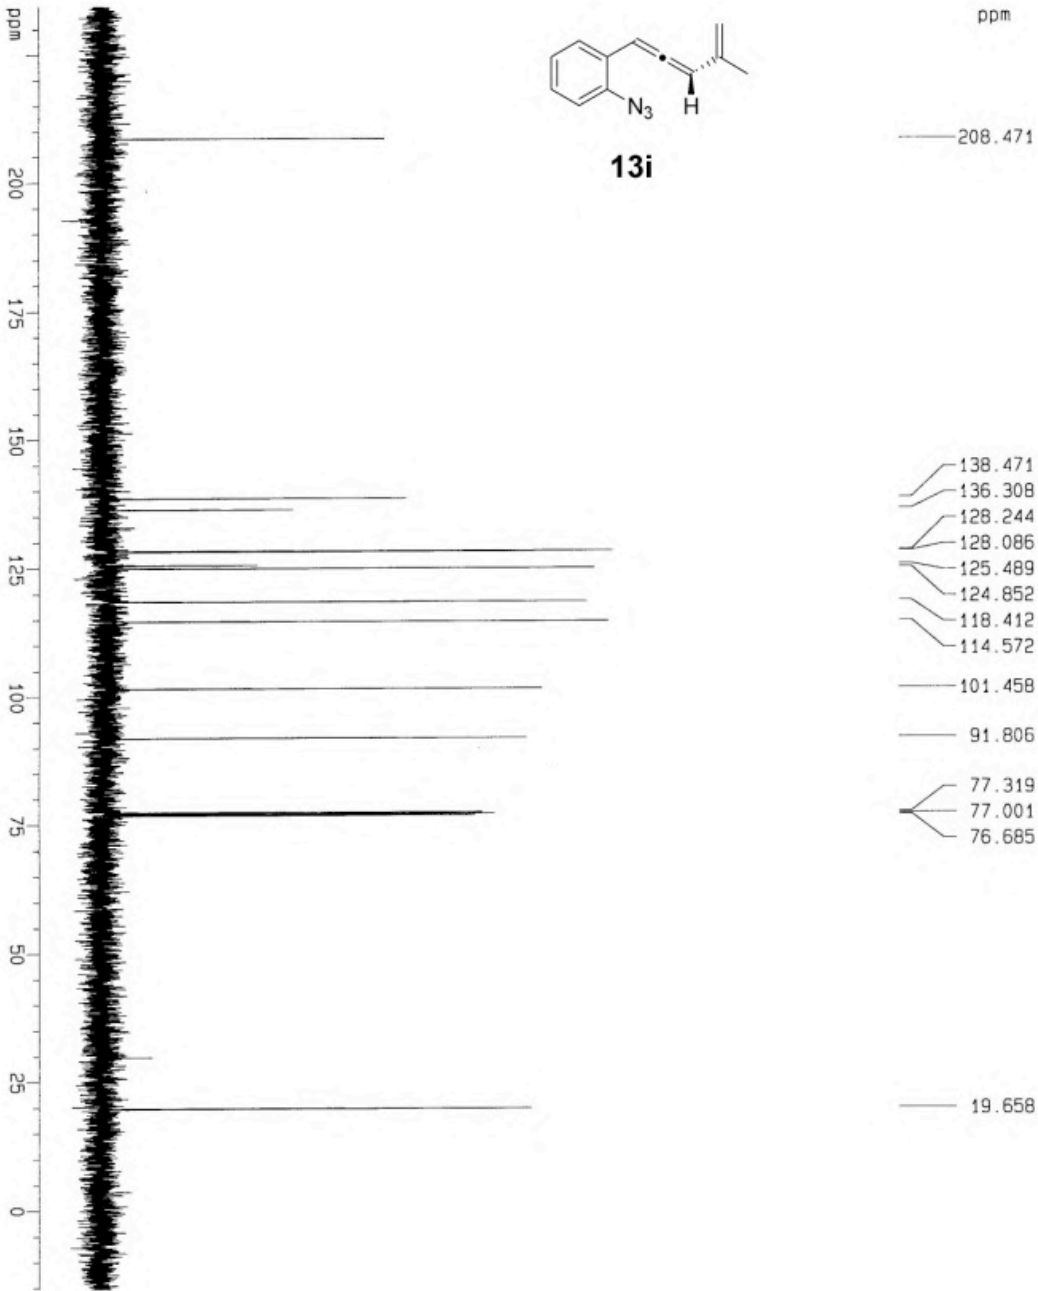

DKH4-260 Product Pale Yellow Oil

Current Data Parameters  
 NAME DKH4-260P  
 EXPNO 2  
 PROCNO 1

F2 - Acquisition Parameters  
 Date\_ 20070528  
 Time 10:57  
 INSTRUM spect  
 PROBNM 5 mm BBI 1H-B  
 PULPROG zgpg30  
 TO 65536  
 SOLVENT CDCl3  
 NS 75  
 DS 4  
 SMH 25125.629 Hz  
 FIDRES 0.383987 Hz  
 AQ 1.3042164 sec  
 RG 16384  
 DM 19.900 usec  
 DE 6.00 usec  
 TE 300.0 K  
 D1 2.00000000 sec  
 d11 0.03000000 sec  
 d12 0.00020000 sec

\*\*\*\*\* CHANNEL f1 \*\*\*\*\*  
 NUC1 13C  
 P1 16.35 usec  
 PL1 -6.00 dB  
 SFO1 100.6279959 MHz

\*\*\*\*\* CHANNEL f2 \*\*\*\*\*  
 CPDPRG2 waltz16  
 NUC2 1H  
 PPRG2 114.00 usec  
 PL2 0.00 dB  
 PL12 24.00 dB  
 PL13 24.00 dB  
 SFO2 400.1315005 MHz

F2 - Processing parameters  
 SI 32768  
 SF 100.6127754 MHz  
 WDW EM  
 SSB 0  
 LB 1.00 Hz  
 GB 0  
 PC 1.40

10 NMR plot parameters  
 CX 20.00 cm  
 FIP 234.397 ppm  
 F1 23583.35 Hz  
 F2 -15.329 ppm  
 PPKCM -1542.28 Hz  
 HZCM 1256.28149 Hz/cm

DKH3-214 Product Ye[low 01]

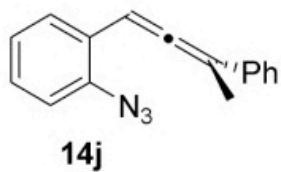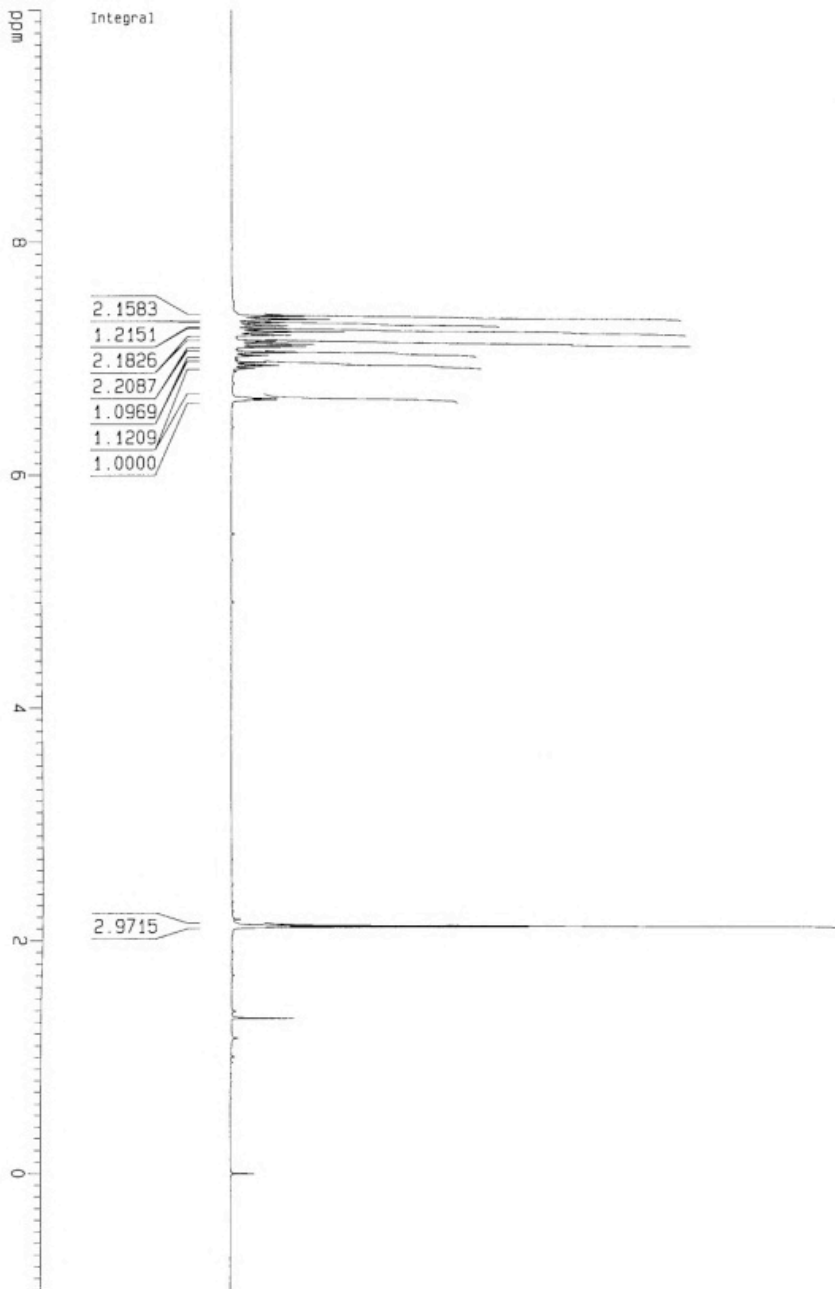

Current Data Parameters  
NAME DKH3-214P  
EXPNO 1  
PROCNO 1

F2 - Acquisition Parameters  
Date\_ 20060927  
Time 13.06  
INSTRUM spect  
PROBHD 5 mm DNP 1H/1  
PULPROG zg30  
TO 65536  
SOLVENT CDCl3  
NS 16  
DS 2  
SMH 6172.839 Hz  
FIDRES 0.094190 Hz  
AQ 5.3084660 sec  
RG 101.6  
DM 81.000 usec  
DE 6.00 usec  
TE 300.0 K  
D1 1.00000000 sec

\*\*\*\*\* CHANNEL f1 \*\*\*\*\*  
NUC1 1H  
P1 11.70 usec  
PL1 0.00 dB  
SF01 299.8716518 MHz

F2 - Processing parameters  
SI 32768  
SF 299.870586 MHz  
WDW no  
SSB 0  
LB 0.00 Hz  
GB 0  
PC 1.00

10 NMR plot parameters  
CX 20.00 cm  
F1P 10.000 ppm  
F1 2998.70 Hz  
F2P -1.000 ppm  
F2 -299.87 Hz  
P1P1CM 0.55000 ppm/cm  
HZCM 164.92853 Hz/cm

DKH3-214 Product

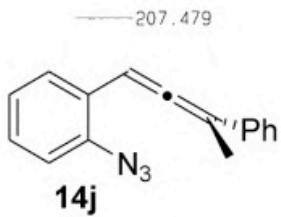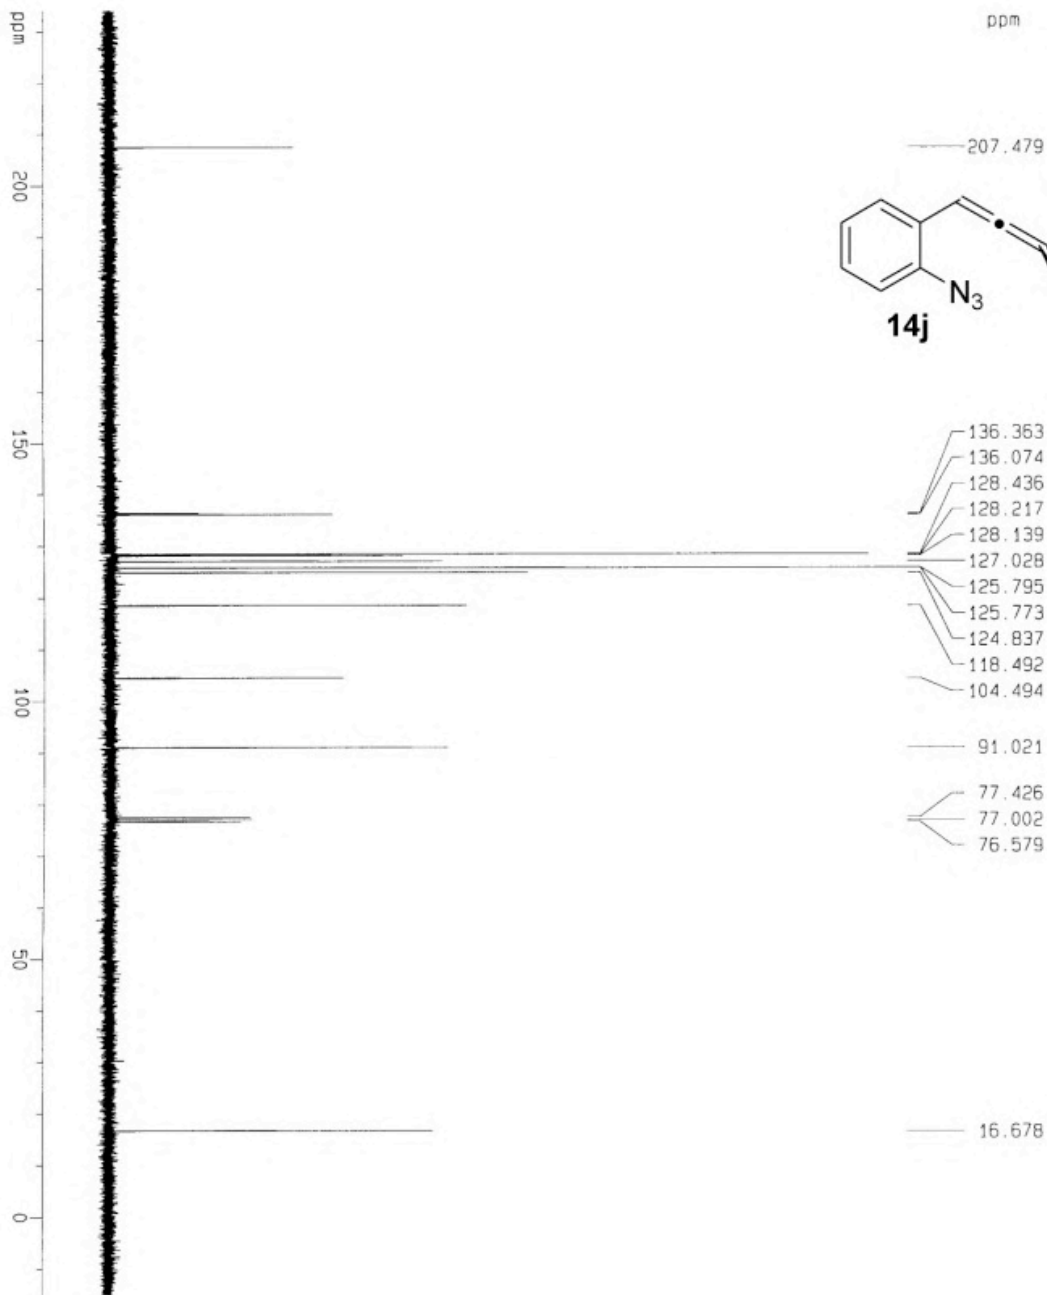

Current Data Parameters

NAME DKH3-214P

EXPNO 2

PROCNO 1

F2 - Acquisition Parameters

Date\_ 20060927

Time 13.11

INSTRUM spect

PROBHD 5 mm QNP 1H/1

PULPROG zgpg30

TD 65536

SOLVENT CDCl3

NS 142

DS 4

SWH 18796.982 Hz

FIDRES 0.286819 Hz

AQ 1.743076 sec

RG 3251

DM 26.600 usec

DE 6.00 usec

TE 300.0 K

D1 2.00000000 sec

D11 0.03000000 sec

D12 0.00000000 sec

\*\*\*\*\* CHANNEL f1 \*\*\*\*\*

NUC1 13C

P1 5.40 usec

PL1 -6.00 dB

SFO1 75.4106357 MHz

\*\*\*\*\* CHANNEL f2 \*\*\*\*\*

CPDPRG2 waltz16

NUC2 1H

PCPD2 115.00 usec

PL2 0.00 dB

PL12 20.00 dB

PL13 20.00 dB

SFO2 299.8711995 MHz

F2 - Processing parameters

SF 32768

SI 75.4023815 MHz

WDW no

SSB 0

LB 0.00 Hz

GB 0

PC 1.40

10 NMR plot parameters

CX 20.00 cm

FIP 234.114 ppm

F1 17652.77 Hz

F2P -15.175 ppm

F2 -1144.22 Hz

PPMCM 12.46446 ppm/cm

HZCM 939.84961 Hz/cm



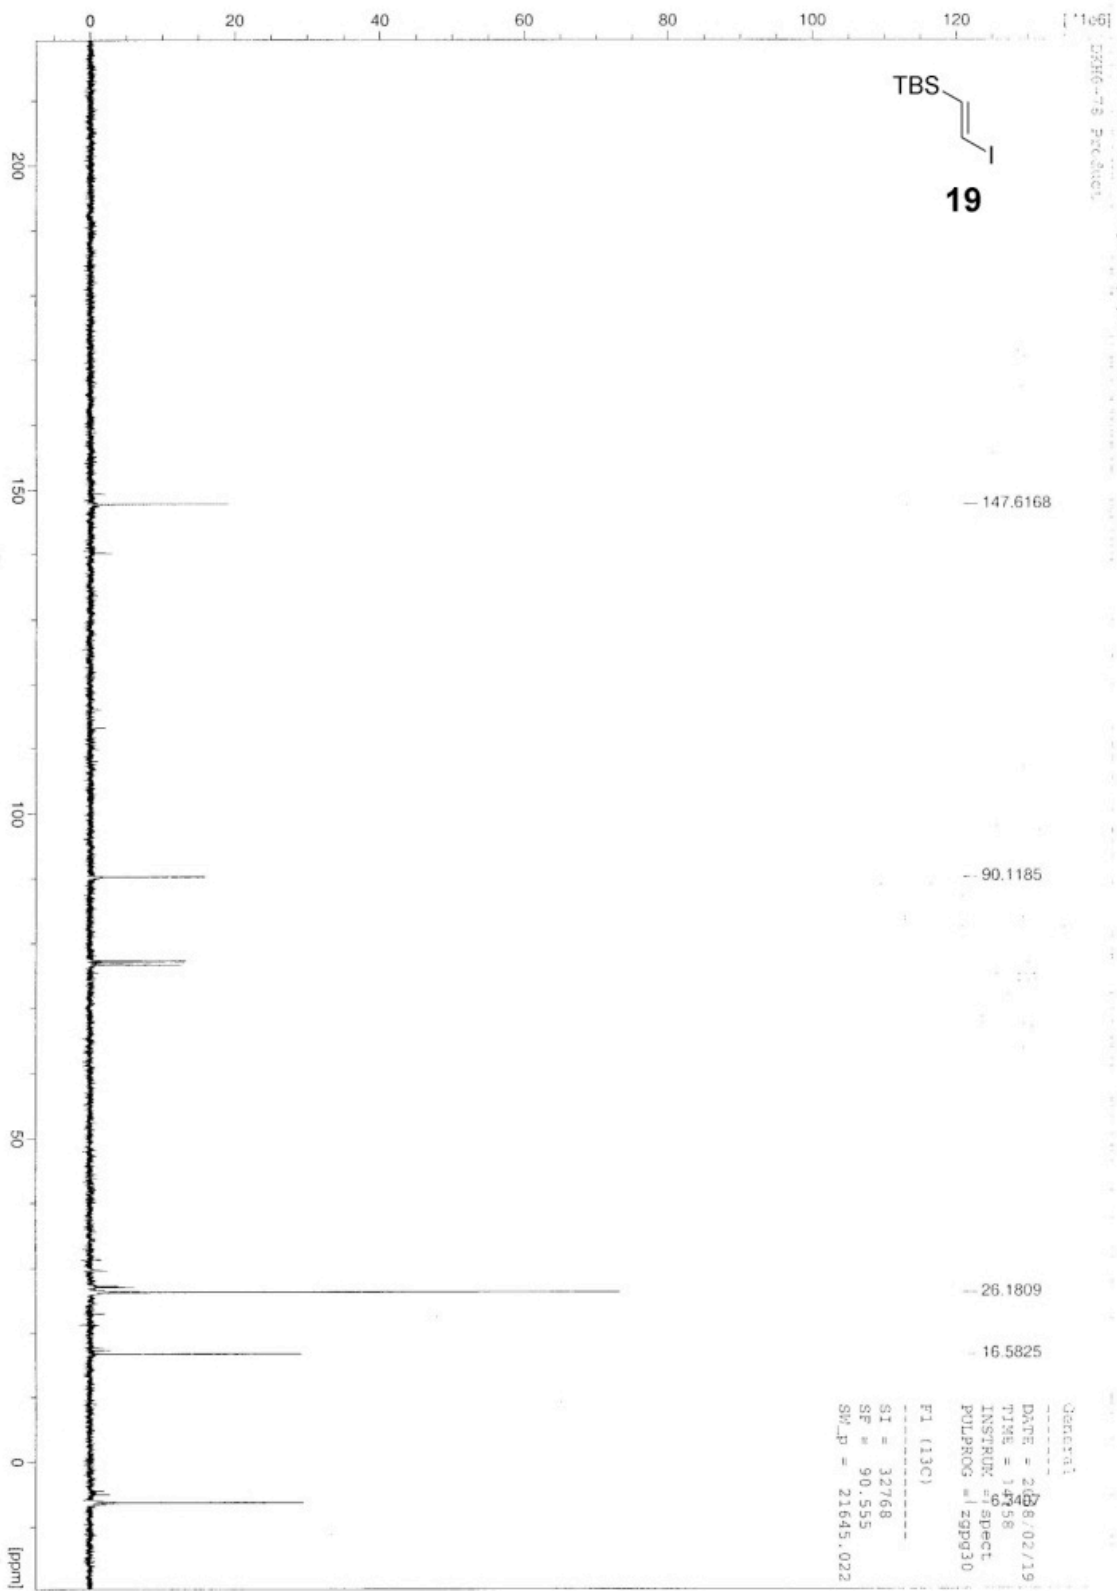



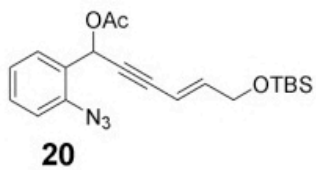

DKH-24 Product Yelllow 011

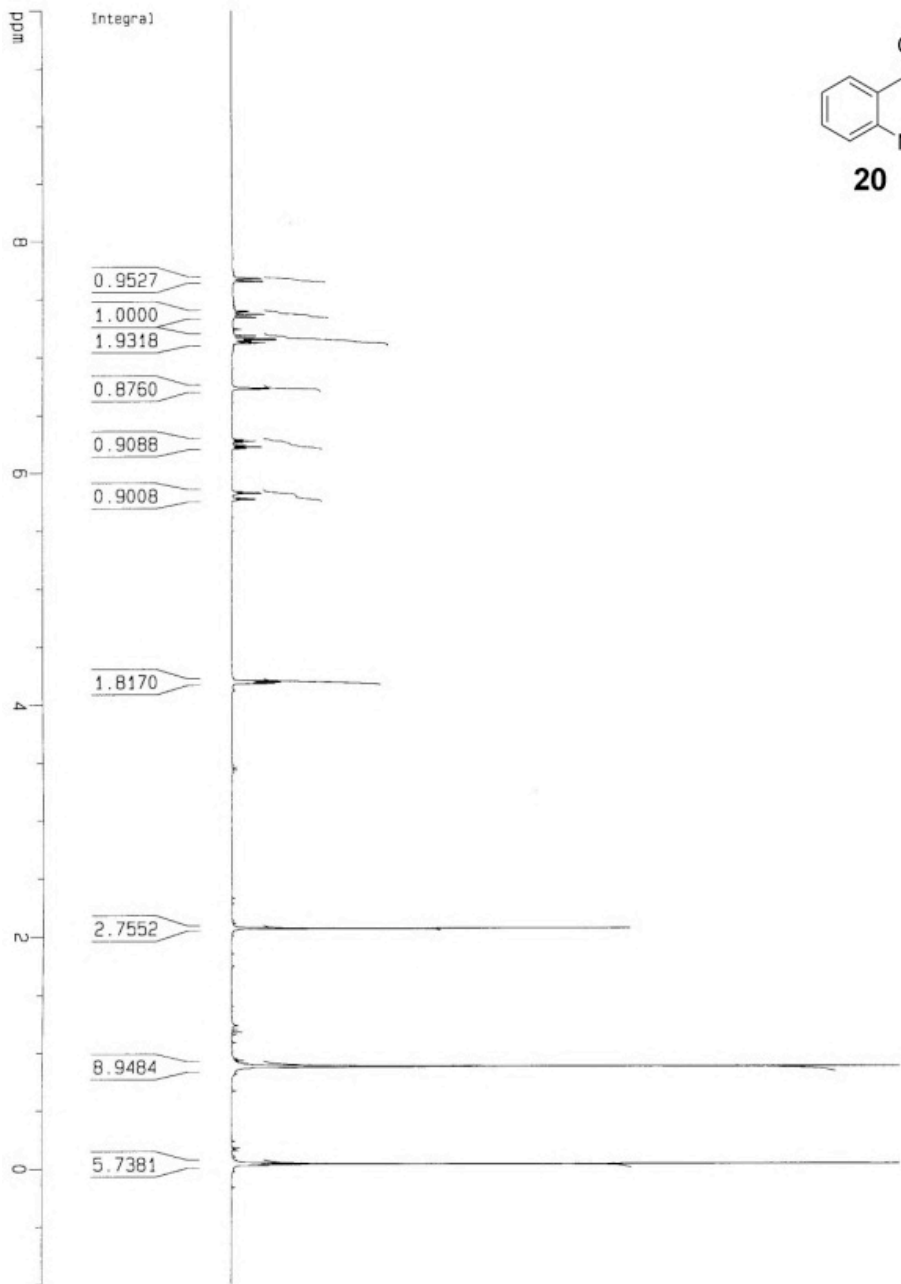

Current Data Parameters  
NAME DKH5-24p  
EXPNO 1  
PROCNO 1

F2 - Acquisition Parameters  
Date\_ 20070710  
Time 16.34  
INSTRUM spect  
PROBHD 5 mm QNP 1H/1  
PULPROG zg30  
TD 65536  
SOLVENT CDCl3  
NS 16  
DS 2  
SWH 6172.839 Hz  
FIDRES 0.094190 Hz  
AQ 5.3084660 sec  
RG 50.8  
DM 81.000 usec  
DE 6.00 usec  
TE 300.0 K  
D1 1.00000000 sec

----- CHANNEL f1 -----  
NUC1 1H  
P1 11.70 usec  
PL1 0.00 dB  
SF01 299.8718518 MHz

F2 - Processing parameters  
SI 32768  
SF 299.8700159 MHz  
MCM no  
SSB 0  
LB 0.00 Hz  
GB 0  
PC 1.00

10 NMR plot parameters  
CX 20.00 cm  
F1P 10.000 ppm  
F1 2998.70 Hz  
F2P -1.000 ppm  
F2 -299.87 Hz  
PPMCM 0.55000 ppm/cm  
HZCM 164.92851 Hz/cm

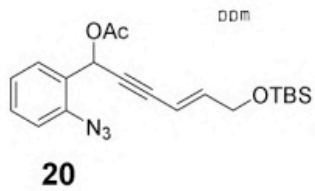

DKH5-24 Product

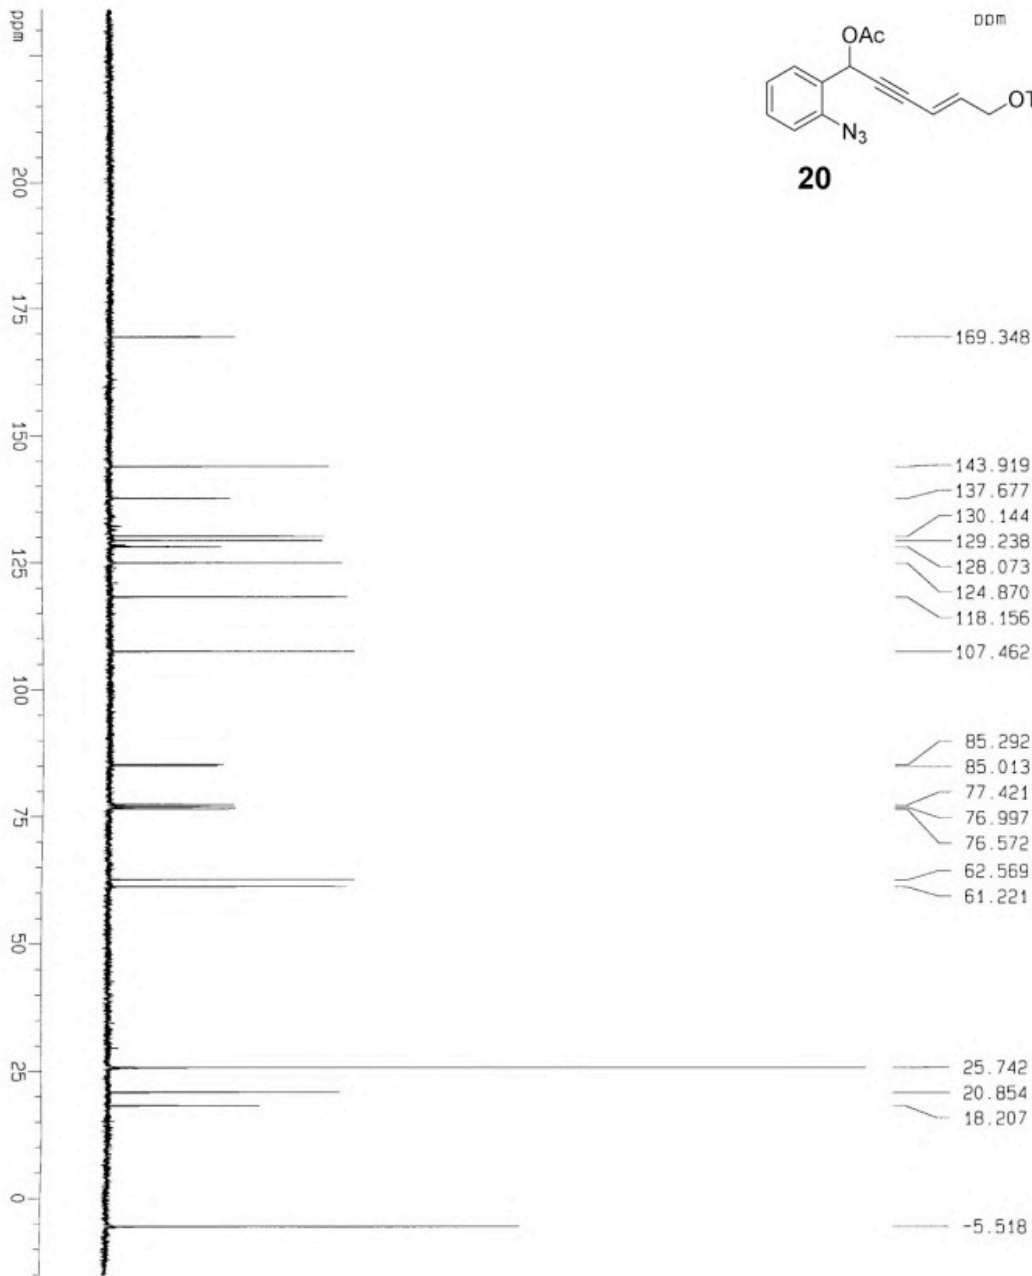

```

Current Data Parameters
NAME          DKH5-24P
EXPNO        2
PROCNO       1

F2 - Acquisition Parameters
Date_        20070710
Time         16.40
INSTRUM     spect
PROBHD      5 mm QNP 1H/1
PULPROG     zgpg30
TD           65536
SOLVENT     CDCl3
NS           76
DS           4
SMH         18795.992 Hz
FIDRES      0.286619 Hz
AQ          1.7433076 sec
RG           4096
DM           26.600 usec
DE           6.00 usec
TE           300.0 K
D1           2.00000000 sec
D11          0.03000000 sec
D12          0.00002000 sec

===== CHANNEL f1 =====
NUC1         13C
P1           5.40 usec
PL1          -6.00 dB
SFO1         75.4106357 MHz

===== CHANNEL f2 =====
CPDPRG2     waltz16
NUC2         1H
PCPD2       115.00 usec
PL2         0.00 dB
PL12        20.00 dB
PL13        20.00 dB
SFO2        299.9711995 MHz

F2 - Processing parameters
SI           32768
SF           75.4023620 MHz
WDW          EM
SSB          0
LB           1.00 Hz
GB           0
PC           1.40

1D NMR plot parameters
CX           20.00 cm
F1P         234.107 ppm
F1          17652.20 Hz
F2P         -15.182 ppm
F2          -1144.79 Hz
PPHVM       12.46445 ppm/cm
HZCM        939.84849 Hz/cm
  
```

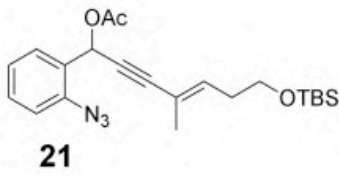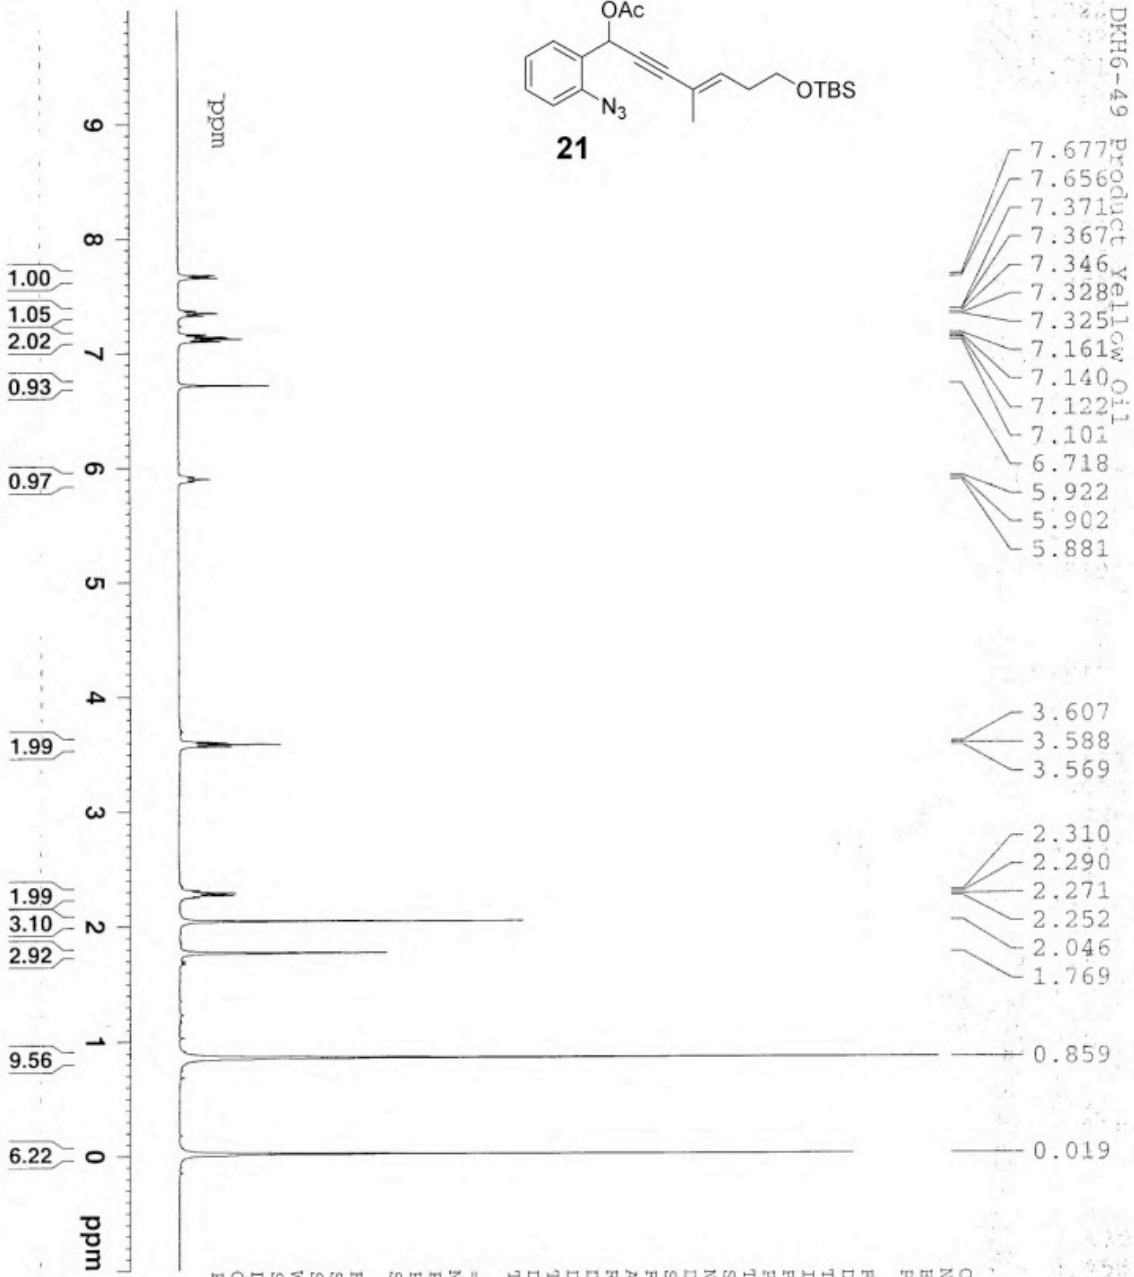

DKH6-49

Product Yellow Oil

- 7.6777
- 7.6566
- 7.3711
- 7.3677
- 7.3466
- 7.3288
- 7.3255
- 7.1611
- 7.1400
- 7.1222
- 7.1011
- 6.7188
- 5.9222
- 5.9022
- 5.8811
- 3.6077
- 3.5888
- 3.5699
- 2.3100
- 2.2900
- 2.2711
- 2.2522
- 2.0466
- 1.7699
- 0.8599
- 0.0199

Current Data Parameters  
 NAME DKH6-49p  
 EXPNO 1  
 PROCNO 1

F2 - Acquisition Parameters  
 Date\_ 20080131  
 Time 14.56  
 INSTRUM spect  
 PROBD 5 mm QNP 1H/15  
 PULPROG zg30  
 TD 65536  
 SOLVENT CDCl3  
 NS 13  
 DS 2  
 SWH 7440.476 Hz  
 FIDRES 0.11533 Hz  
 AQ 4.404694 sec  
 RG 40.3  
 DM 67.200 usec  
 DE 6.00 usec  
 TE 298.4 K  
 D1 1.00000000 sec  
 TD0 1

==== CHANNEL f1 =====  
 NUC1 1H  
 P1 14.93 usec  
 PL1 -3.00 dB  
 SFO1 360.1322240 MHz

F2 - Processing Parameters  
 SI 32768  
 SF 360.1300215 MHz  
 WDW no  
 SSB 0  
 LB 0.00 Hz  
 GB 0  
 PC 1.00

DKH6-49 Product Yellow 011

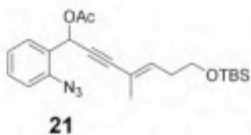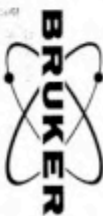

Current Data Parameters  
NAME DKH6-49p  
PROCNO 1

F2 - Acquisition Parameters

Date\_ 20080131  
Time 15.02  
INSTRUM spect  
PROBHD 5 mm QNP 1H/13  
PULPROG zgpg30  
TD 65536  
SOLVENT CDCl3  
NS 89  
DS 4  
SMR 21645.021 Hz  
PTDRBS 0.330277 Hz  
AQ 1.511916 sec  
RG 14596.3  
DM 23.100 usec  
DE 6.400 usec  
TE 284.9 K  
D1 2.00000000 sec  
D11 0.03000000 sec  
DELTA 1.89999998 sec  
TD0 1

\*\*\*\*\* CHANNEL f1 \*\*\*\*\*  
NUC1 13C  
P1 1.25 usec  
PL -1.00 dB  
SFO1 90.5638160 MHz

\*\*\*\*\* CHANNEL f2 \*\*\*\*\*  
CROSSDC WALTZ16  
NUC2 1H  
PCPD0 110.00 usec  
PL2 -1.00 dB  
PL12 20.78 dB  
PL13 6.03 dB  
SFO2 360.1314000 MHz

F2 - Processing parameters  
SI 32768  
SF 90.5647757 MHz  
WDW EM  
SSB 0  
LB 1.00 Hz  
GB 1.40

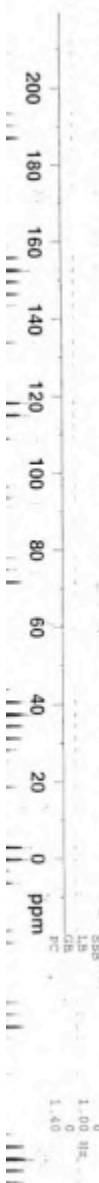

DNH6-80 Product Yellow Oil

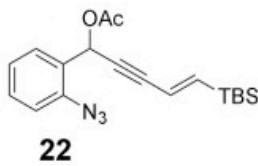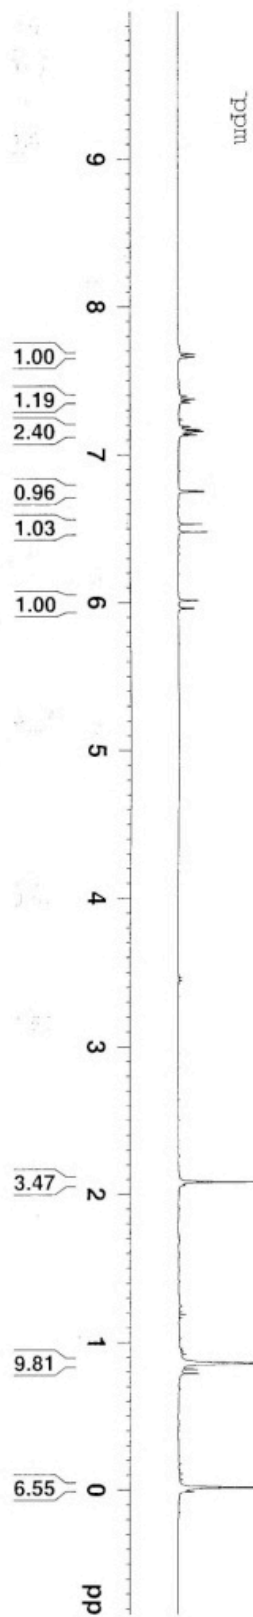

```

===== CHANNEL f1 =====
NUC1 1H
P1 14.93 usec
PL1 -3.00 dB
SFO1 360.1322840 MHz

F2 - Processing parameters
SI 32768
SF 360.1300210 MHz
WDW no
SSB 0
LB 0.00 Hz
GB 0
PC 1.00

===== Acquisition Parameters =====
Date_ 20080220
Time 14.54
INSTRUM spect
PROBHD 5 mm QNP 1H/15
PULPROG zg30
TD 65536
SOLVENT CDCl3
DS 16
NS 2
SOLVENT 7440.476 Hz
SMH 0.113513 Hz
FIDRES 4.4040694 sec
AQ 57
RG 67.200 usec
DE 6.00 usec
TE 298.2 K
D1 1.00000000 sec
TD0 1
  
```

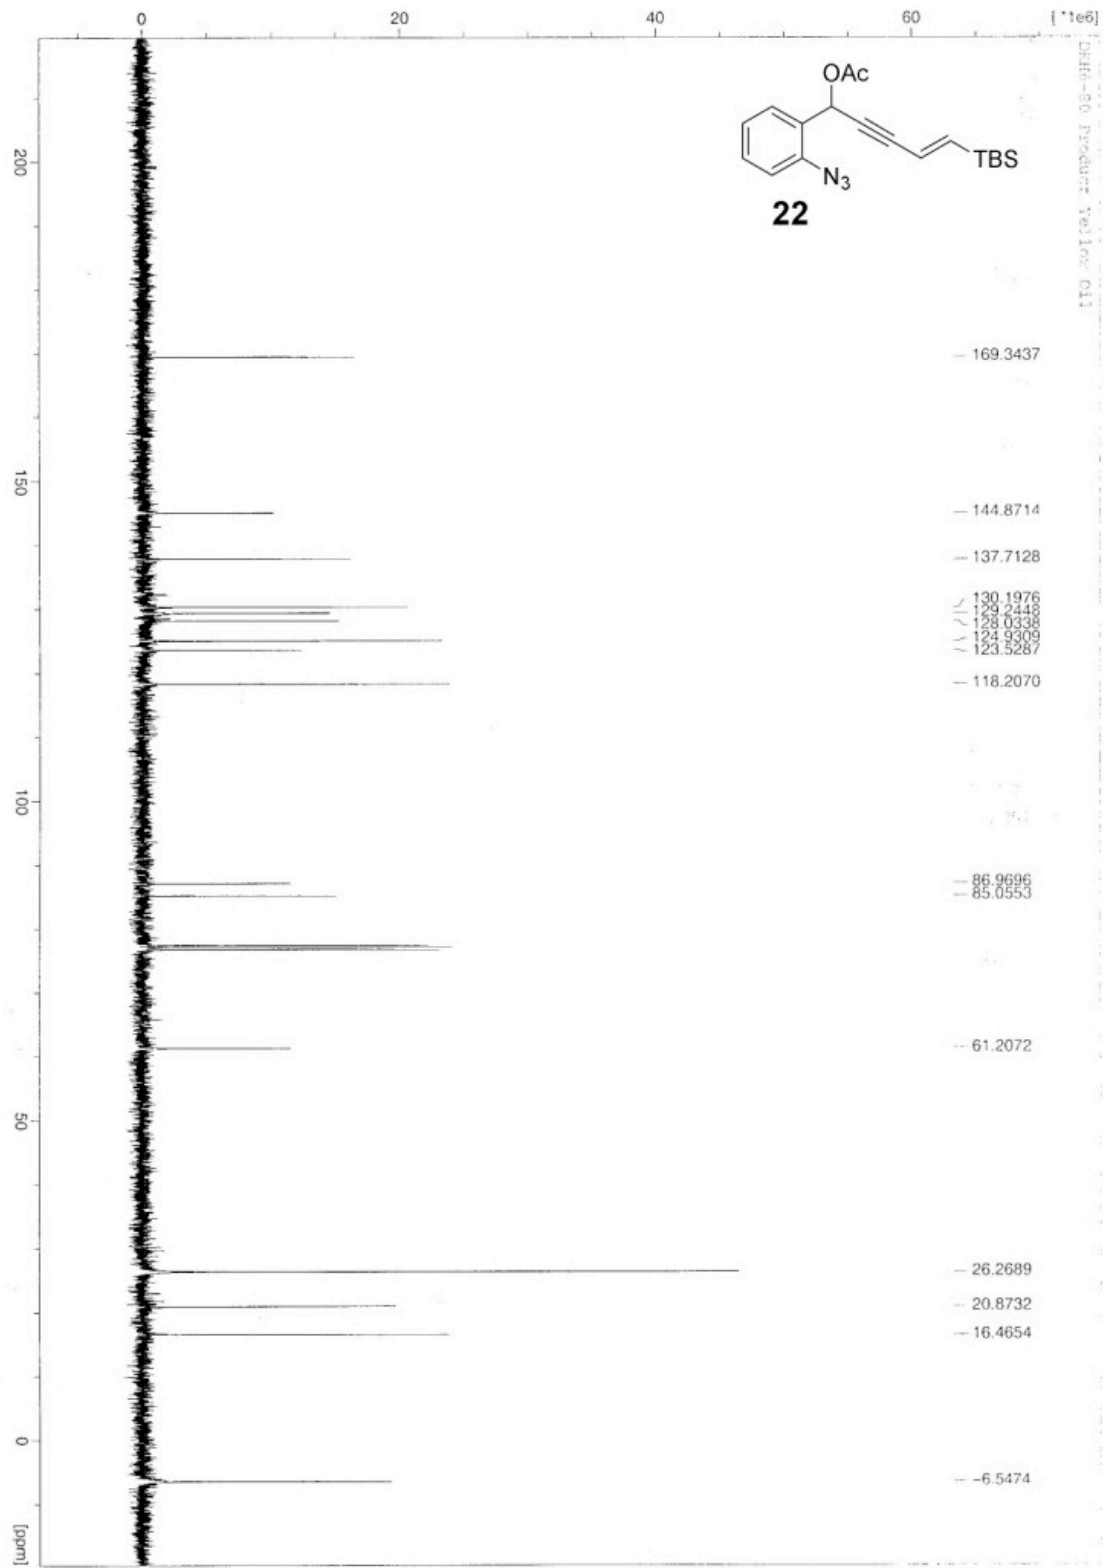

DKH5-26 Product Yellow 011

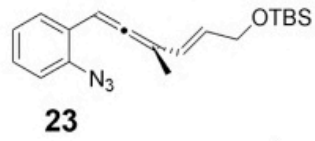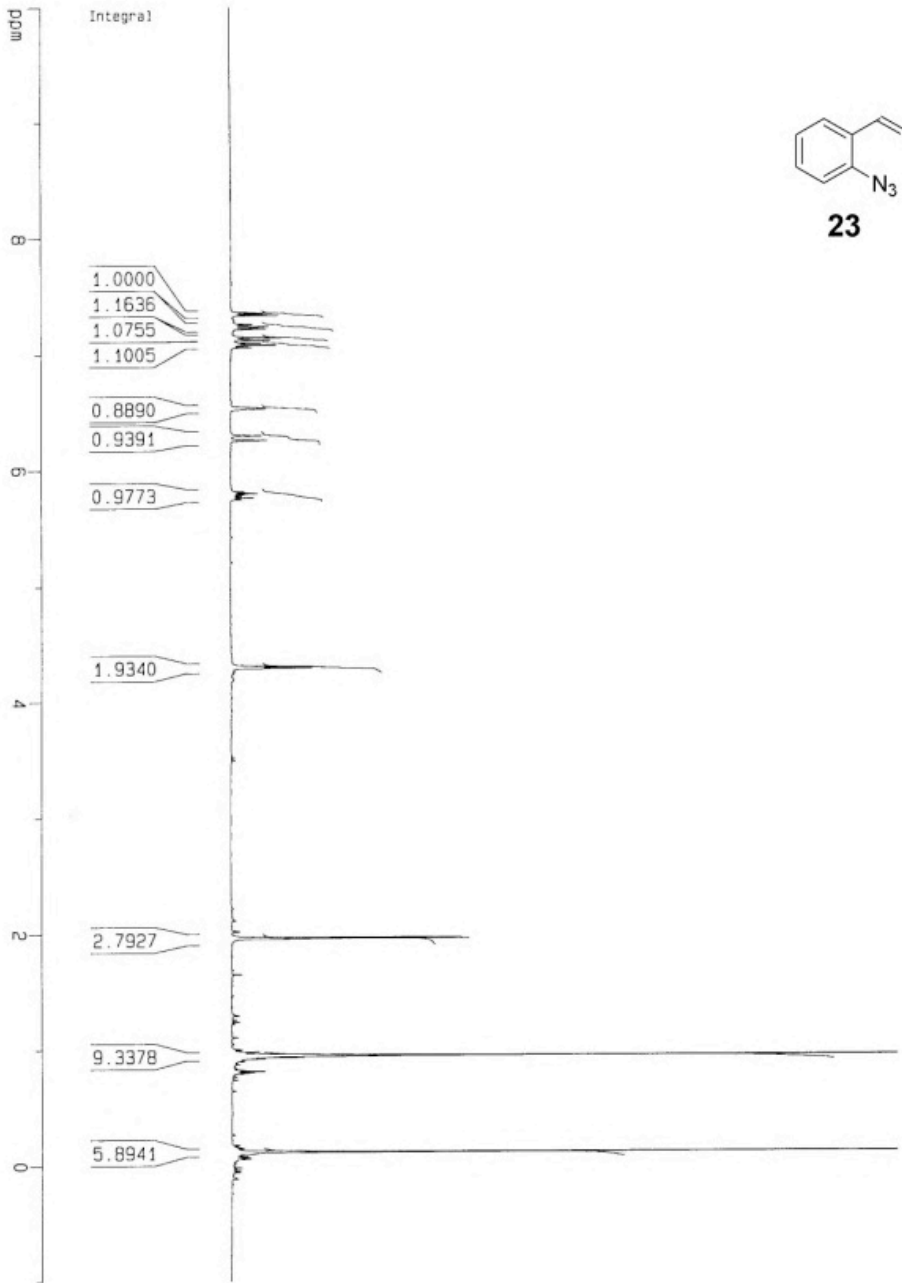

Current Data Parameters  
 NAME DKH5-26P  
 EXPNO 1  
 PROCNO 1

F2 - Acquisition Parameters  
 Date\_ 20070713  
 Time 15.00  
 INSTRUM spect  
 PROBHD 5 mm BBI 1H-B  
 PULPROG zg30  
 TD 65536  
 FIDRES 0.126314 Hz  
 AQ 3.9584243 sec  
 RG 45.3  
 DW 60.400 usec  
 DE 6.00 usec  
 TE 300.0 K  
 D1 1.00000000 sec

===== CHANNEL f1 =====  
 NUC1 1H  
 P1 6.45 usec  
 PL1 0.00 dB  
 SF01 400.1324710 MHz

F2 - Processing parameters  
 SI 32768  
 SF 400.1300075 MHz  
 MDW no  
 SSB 0  
 LB 0.00 Hz  
 GB 0  
 PC 1.00

1D NMR plot parameters  
 CX 20.00 cm  
 F1P 10.000 ppm  
 F1 4001.30 Hz  
 F2P -1.000 ppm  
 F2 -400.13 Hz  
 PPMCK 0.55000 ppm/cm  
 HZCM 220.07150 Hz/cm

DKH5-28 Product

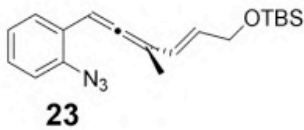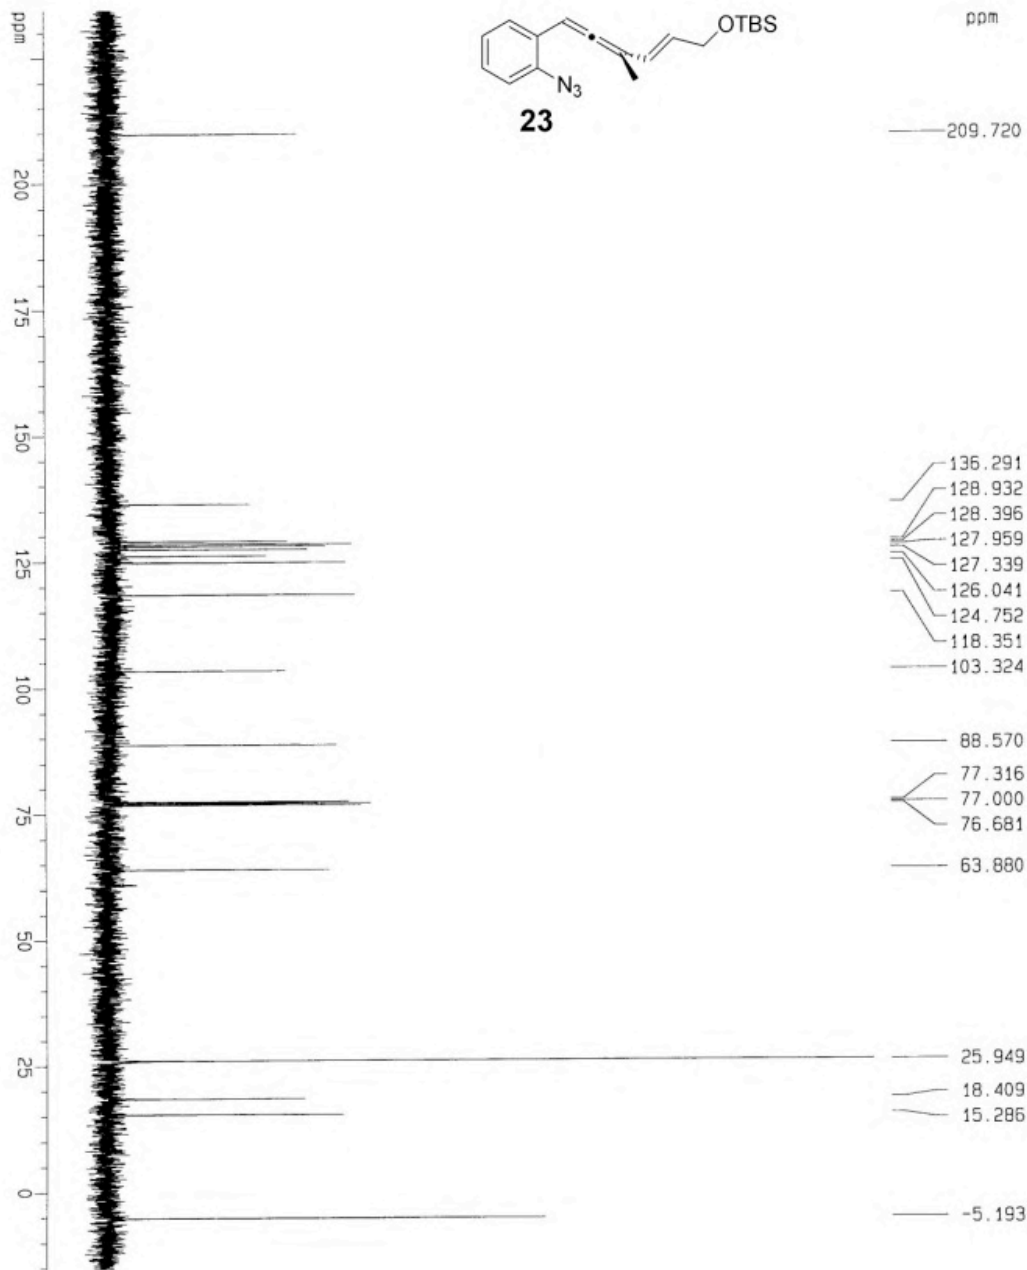

- 136.291
- 128.932
- 128.396
- 127.959
- 127.339
- 126.041
- 124.752
- 118.351
- 103.324
- 88.570
- 77.316
- 77.000
- 76.681
- 63.880
- 25.949
- 18.409
- 15.286
- 5.193

```

Current Data Parameters
NAME      DKH5-28P
EXPNO    1
PROCNO   2

F2 - Acquisition Parameters
Date_     20070713
Time      15.06
INSTRUM   spect
PROBHD    5 mm BBI 1H-B
PULPROG   zgpg30
TD         65536
SOLVENT   CDCl3
NS         92
DS         4
SWH        25125.629 Hz
FIDRES     0.381387 Hz
AQ         1.3042164 sec
RG         8192
DM         19.900 usec
DE         6.00 usec
TE         300.0 K
D1         2.00000000 sec
d11        0.03000000 sec
d12        0.00002000 sec

===== CHANNEL f1 =====
NUC1      13C
P1        16.36 usec
PL1       -6.00 dB
SF01      100.6237959 MHz

===== CHANNEL f2 =====
COPROG2   waltz16
NUC2       1H
PCPD2      114.00 usec
PL2        0.00 dB
PL12       24.00 dB
PL13       24.00 dB
SF02       400.1316005 MHz

F2 - Processing parameters
SI         32768
SF         100.6127769 MHz
MVM        EM
SSB        0
LB         1.00 Hz
GB         0
PC         1.40

1D NMR plot parameters
CX         20.00 cm
F1P        234.382 ppm
F1         23561.82 Hz
F2P        -15.344 ppm
F2         -1543.80 Hz
PRNCKM    12.48530 ppm/cm
HZCKM     1256.28137 Hz/cm
    
```



DKH6-53 Product Red Oil

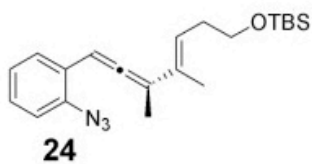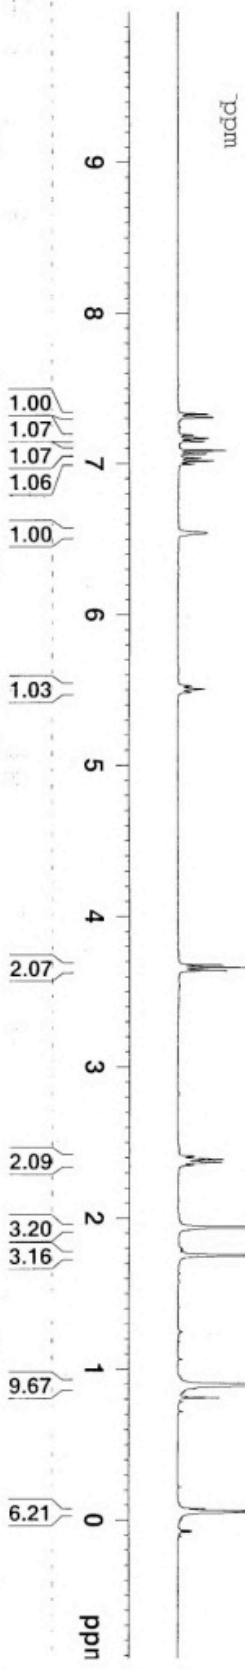

```

Current Data Parameters
NAME          DKH6-53P
EXPNO         1
PROCNO        1
-----
F2 - Acquisition Parameters
Date_         20080201
Time          20.18
INSTRUM      spect
PROBHD       5 mm QNP 1H/15
PULPROG      zg30
TD            65536
SOLVENT      CDCl3
NS           16
DS           2
SWH          7440.476 Hz
FIDRES       0.11323 Hz
AQ           4.4040694 sec
RG           40.3
DM           67.200 use
DE           68.00 use
DL           280.0 sec
TDO          1.00000000 sec
-----
***** CHANNEL f1 *****
NUC1          1H
P1           14.93 use
PL1          -3.00 dB
SFO1         360.132240 MHz
-----
F2 - Processing parameters
SI           360.1300393 MHz
SF           32768
NTW          no
SSB          0
LB           0.00 Hz
GB           0
PC           1.00
  
```

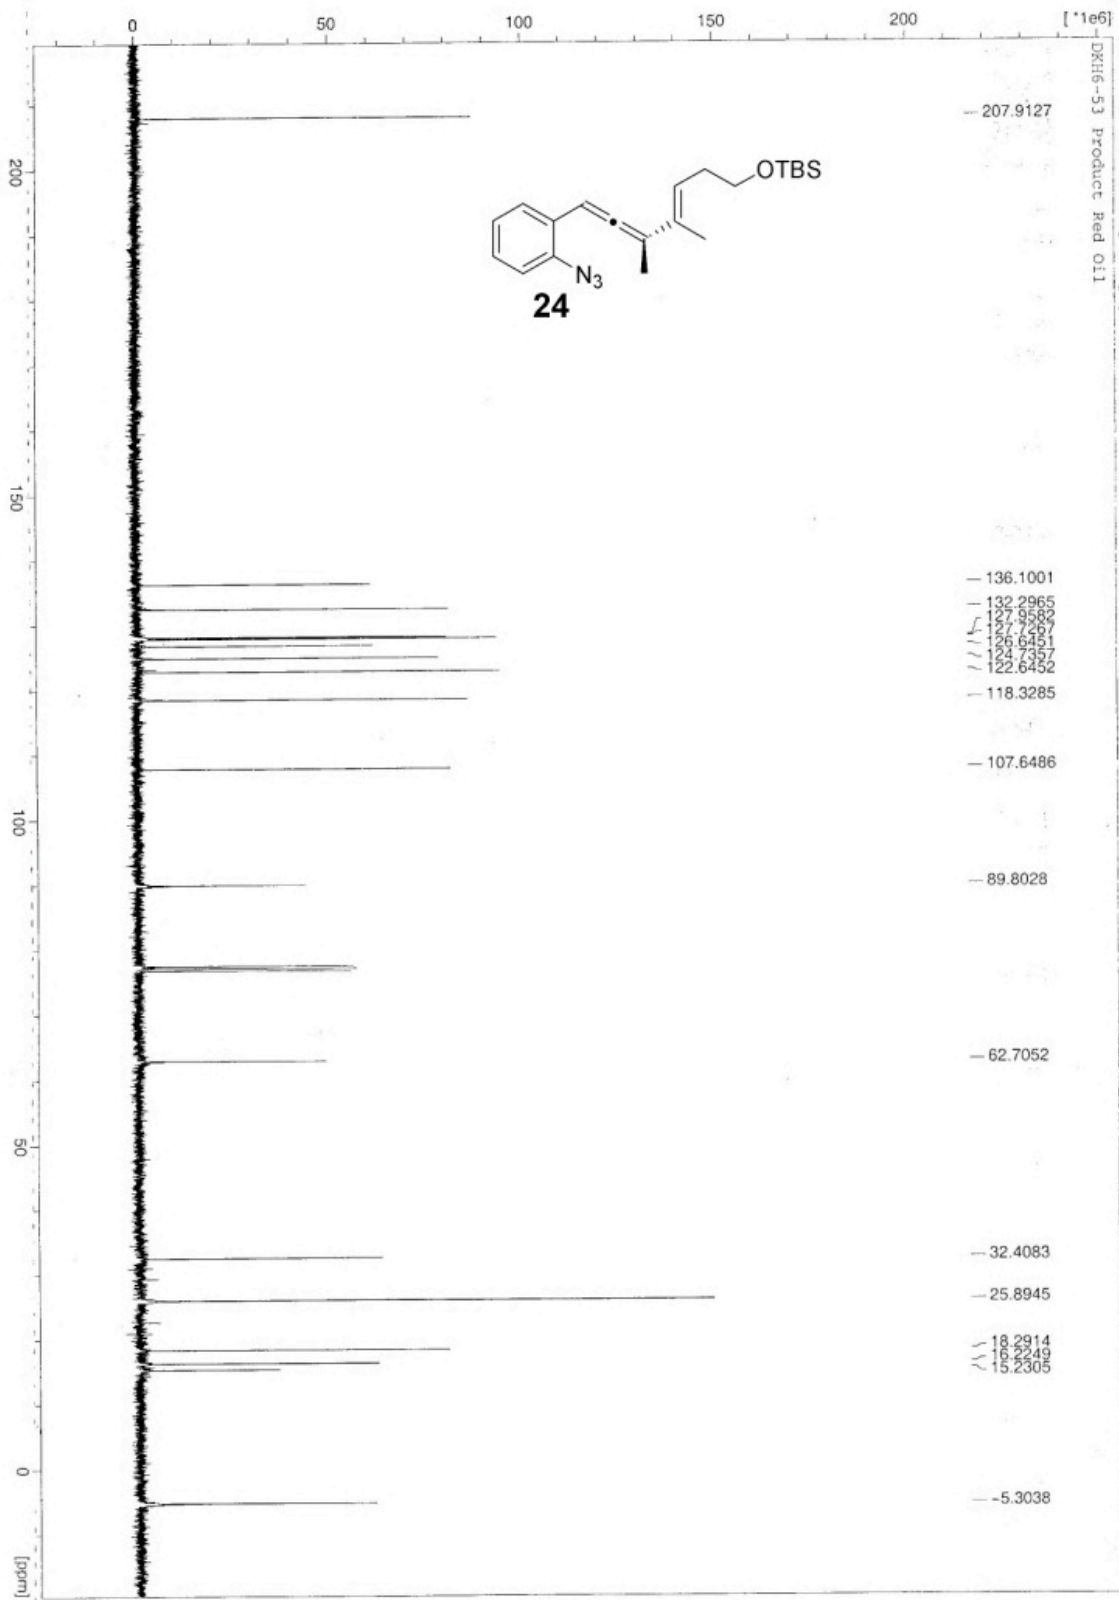

DKH6-92 Product colorless 011

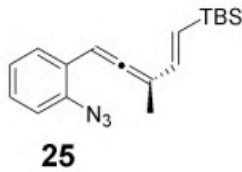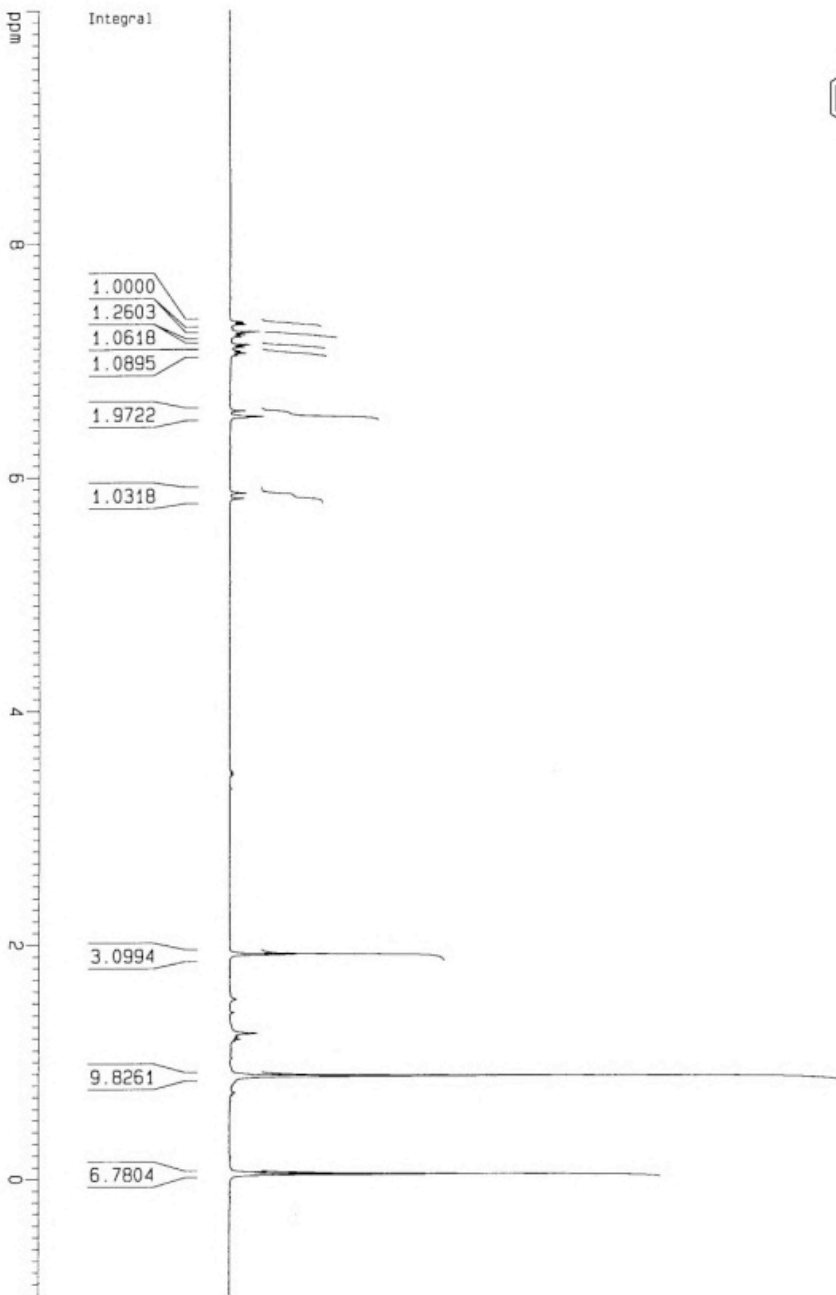

```

Current Data Parameters
NAME          DKH6-B2P
EXPNO         1
PROCNO        1

F2 - Acquisition Parameters
Date_         20080221
Time          10.31
INSTRUM      spect
PROBHD       5 mm BBI 1H-B
PULPROG      zg30
TD            65536
SOLVENT      CDCl3
NS            16
DS            2
SMH           8278.146 Hz
FIDRES       0.126314 Hz
AQ           3.9584243 sec
RG           1149.4
DM           60.400 usec
DE           5.00 usec
TE           300.0 K
D1           1.00000000 sec

===== CHANNEL f1 =====
NUC1          1H
P1            6.45 usec
PL1           0.00 dB
SFO1         400.1324710 MHz

F2 - Processing parameters
SI            32768
SF           400.1300169 MHz
WDW           no
SSB           0
LB            0.00 Hz
GB            0
PC            1.00

1D NMR plot parameters
CX            20.00 cm
F1p          10.000 ppm
F1           4001.30 Hz
F2p          -1.000 ppm
F2           -400.13 Hz
PPMCHM       0.55000 ppm/cm
HZCM         220.07150 Hz/cm
  
```

DKH6-85 Product Yellow 011

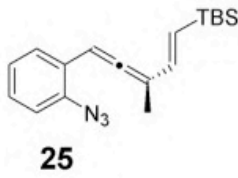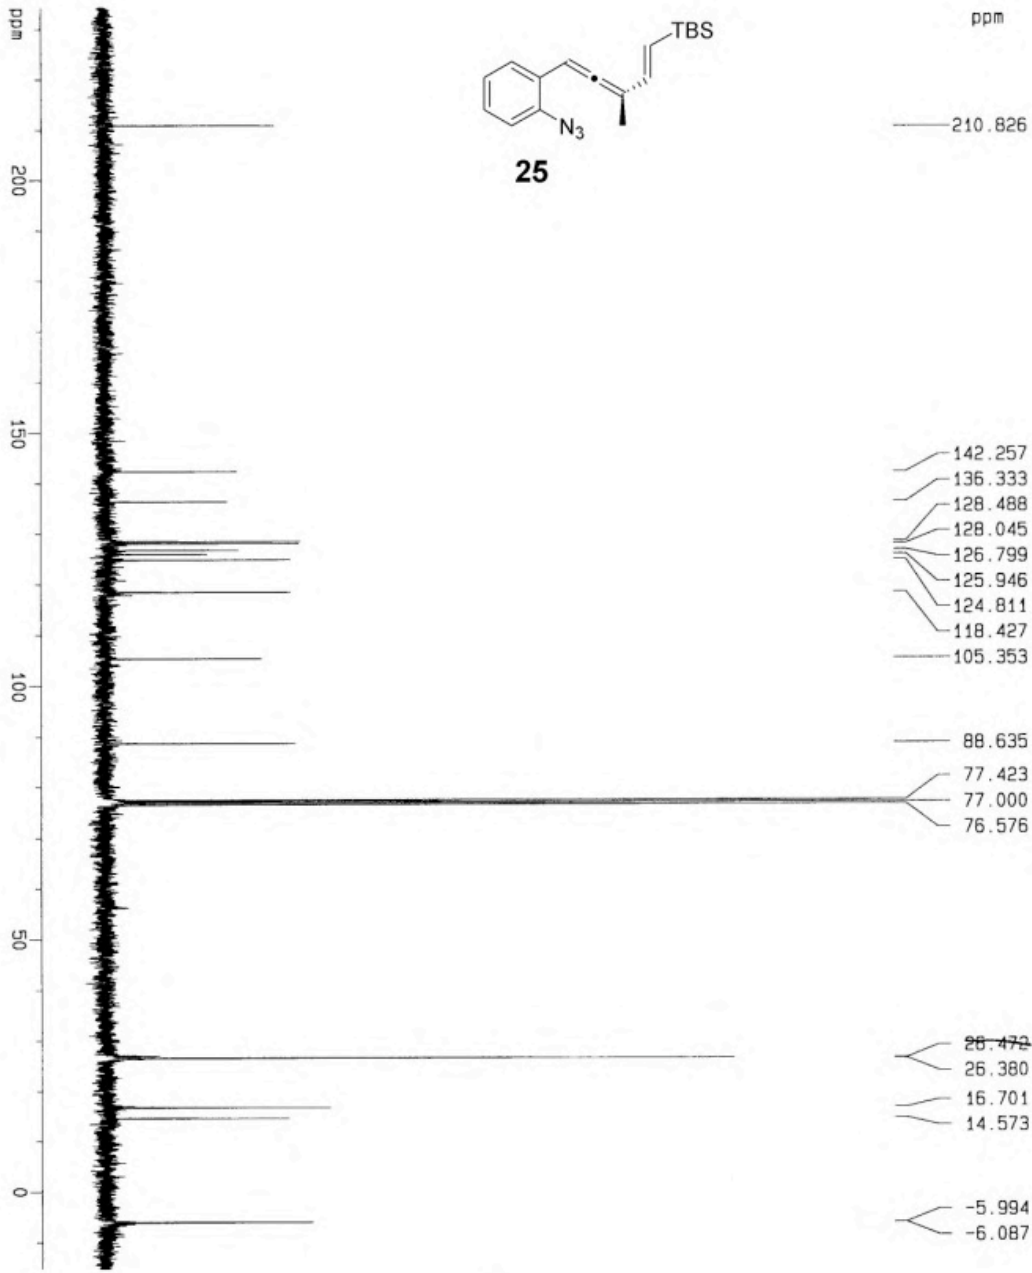

```

Current Data Parameters
NAME      DKH6-85P
EXPNO    2
PROCNO   1

F2 - Acquisition Parameters
Date_    20080223
Time     12.08
INSTRUM  spect
PROBHD   5 mm Multinu
PULPROG  zgpg30
TD        65536
SOLVENT  CDCl3
NS        747
DS        4
SMH       18832.393 Hz
FIDRES   0.287360 Hz
AQ        1.7400308 sec
RG         16384
DM        26.550 usec
DE        6.00 usec
TE        300.0 K
D1        2.00000000 sec
d11       0.03000000 sec
d12       0.00002000 sec

===== CHANNEL f1 =====
NUC1      13C
P1        11.80 usec
PL1       0.00 dB
SFO1      75.4760200 MHz

===== CHANNEL f2 =====
CPDPRG2  waltz16
NUC2      1H
PCPD2    110.00 usec
PL2       0.00 dB
PL12     17.50 dB
PL13     17.50 dB
SFO2     300.1312005 MHz

F2 - Processing parameters
SI        32768
SF        75.467514 MHz
WDW       EM
SSB       0
LB        1.00 Hz
GB        0
PC        1.40

1D NMR plot parameters
CX        20.00 cm
F1P       234.333 DDM
F1        17684.71 Hz
F2P       -15.208 ppm
F2        -1147.68 Hz
PPMKW    12.47711 DDM/cm
HZCM     941.61969 HZ/cm
    
```

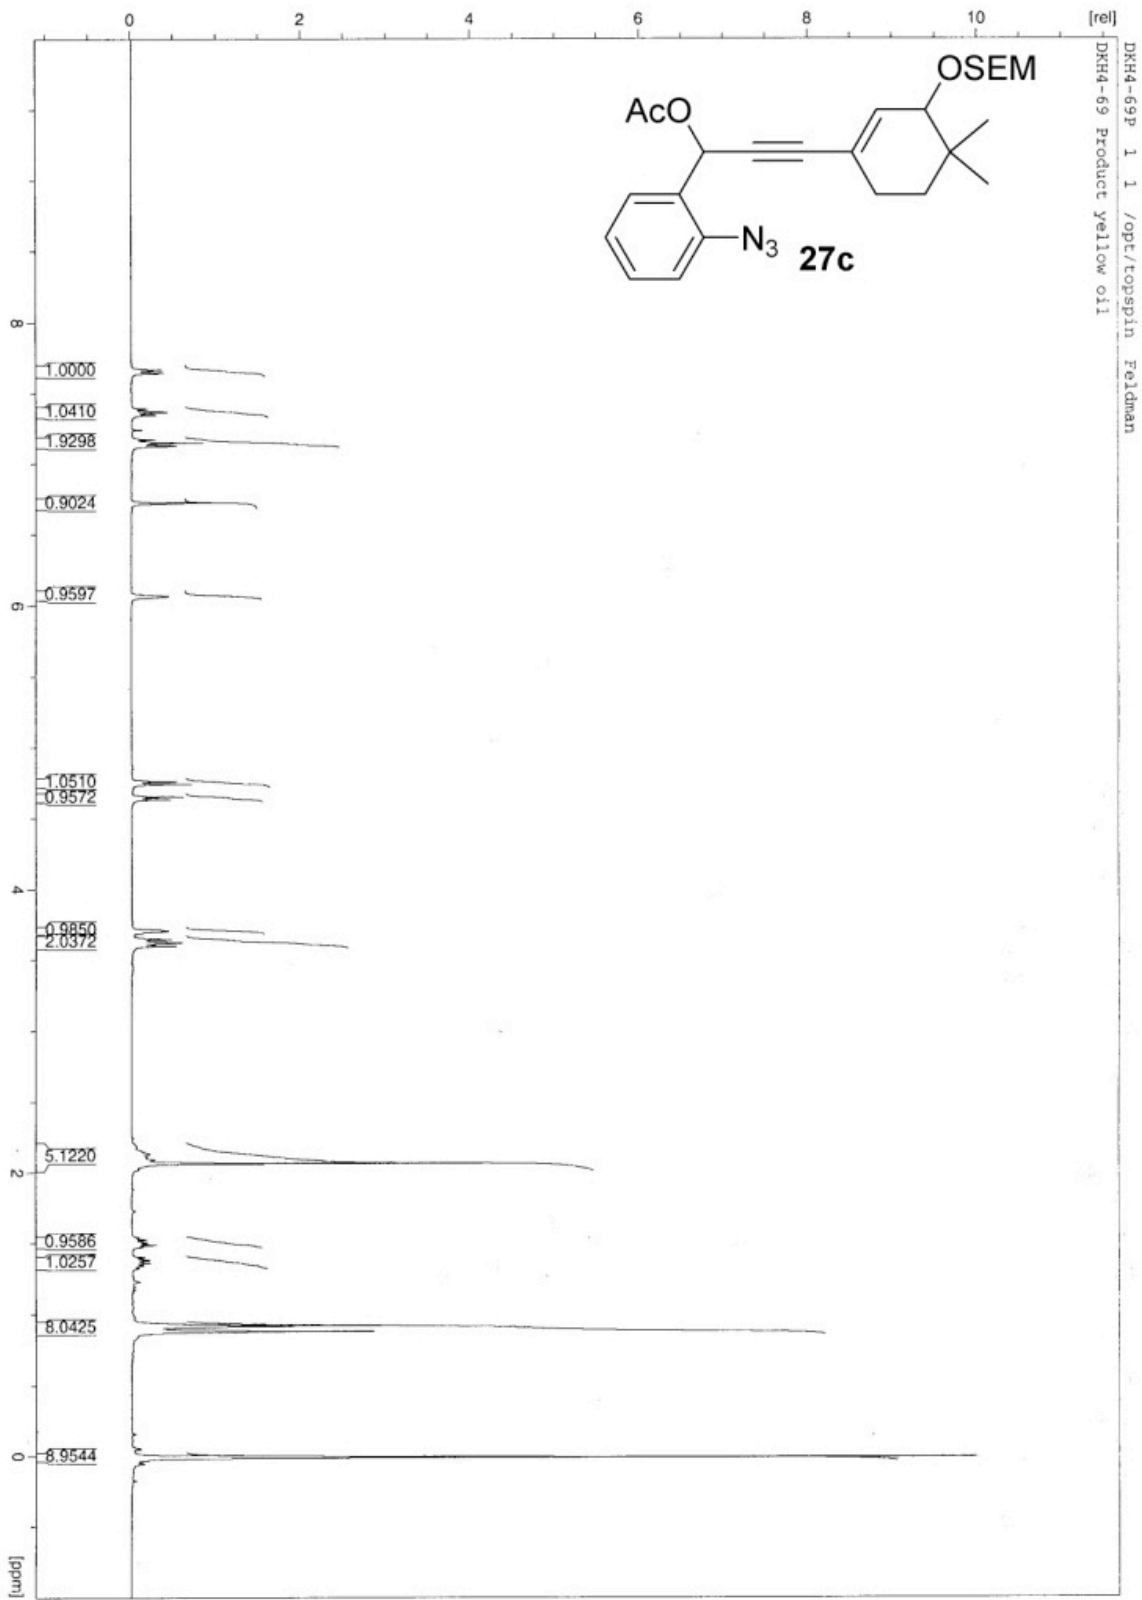

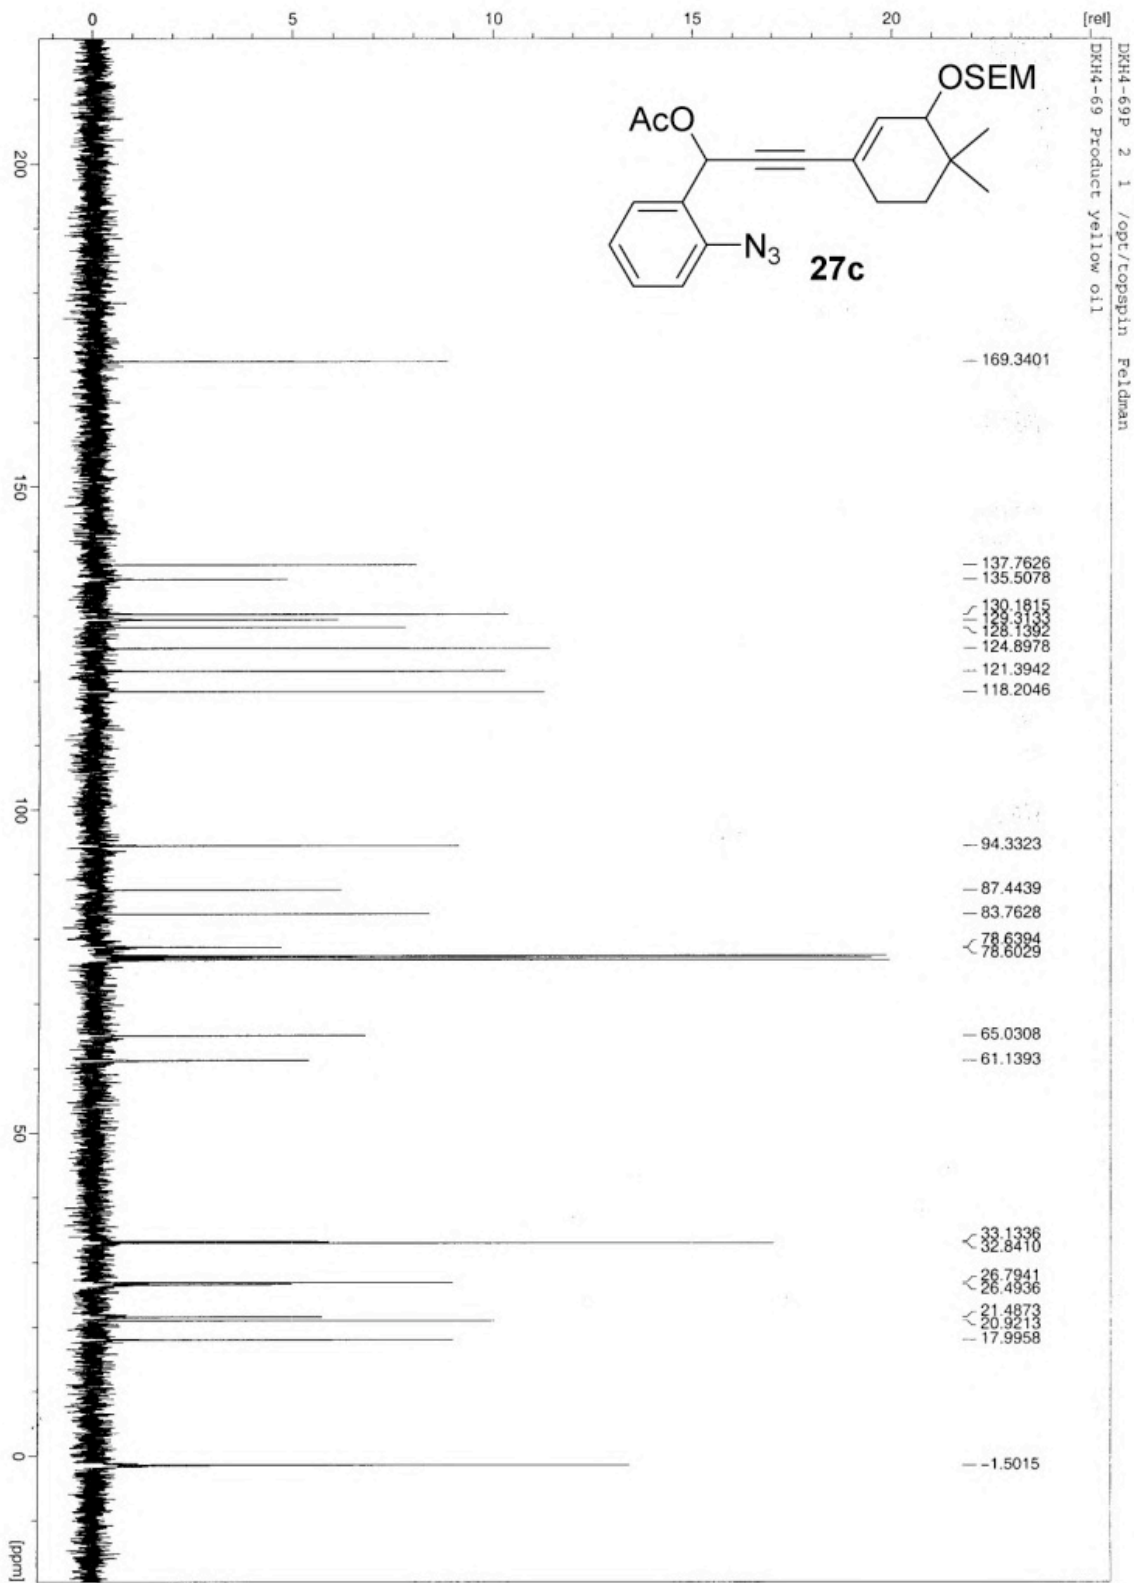

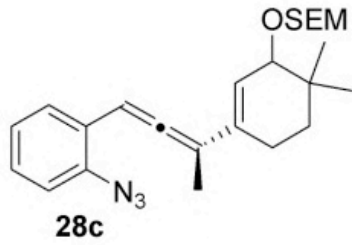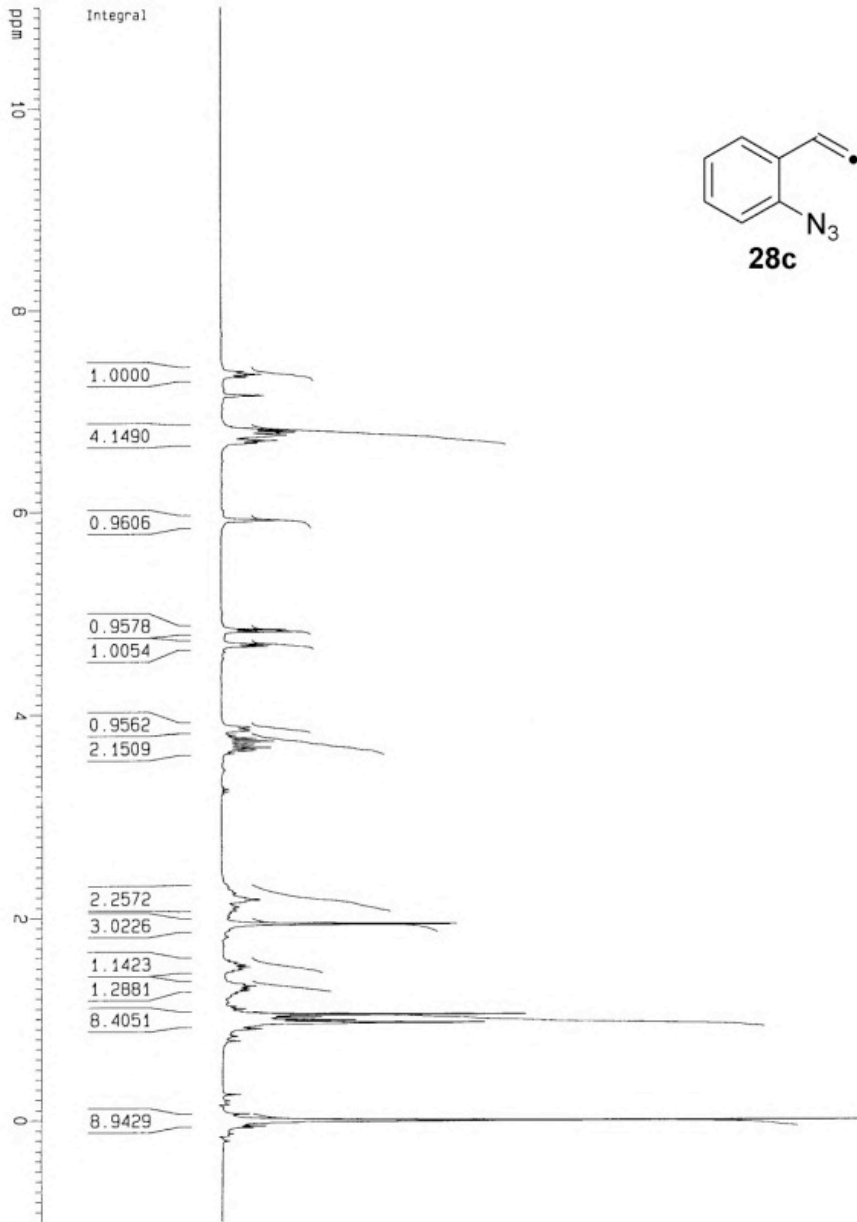

```

Current Data Parameters
NAME      DKH3-140P
EXPNO    1
PROCNO   1

F2 - Acquisition Parameters
Date_    20060811
Time     14.58
INSTRUM  spect
PROBHD   5 mm MUltiNu
PULPROG  zg30
TD        65536
SOLVENT  CDCl3
NS        16
DS        2
SMH       6172.839 Hz
FIDRES    0.094190 Hz
AQ        5.3084660 sec
RG        57
DM        81.000 usec
DE        6.00 usec
TE        300.0 K
D1        1.00000000 sec

===== CHANNEL f1 =====
NUC1      1H
P1        9.60 usec
PL1       -6.00 dB
SFO1     300.1318534 MHz

F2 - Processing parameters
SI        32768
SF        300.1300354 MHz
WDW       no
SSB       0
LB        0.00 Hz
GB        0
PC        1.00

1D NMR plot parameters
CX        20.00 ppm
F1P       11.000 ppm
F1        3301.43 Hz
F2P       -1.000 ppm
F2        -300.13 Hz
PPMCKM   0.60000 ppm/cm
HZCKM    180.07802 Hz/cm
    
```

DKH3-140 Product

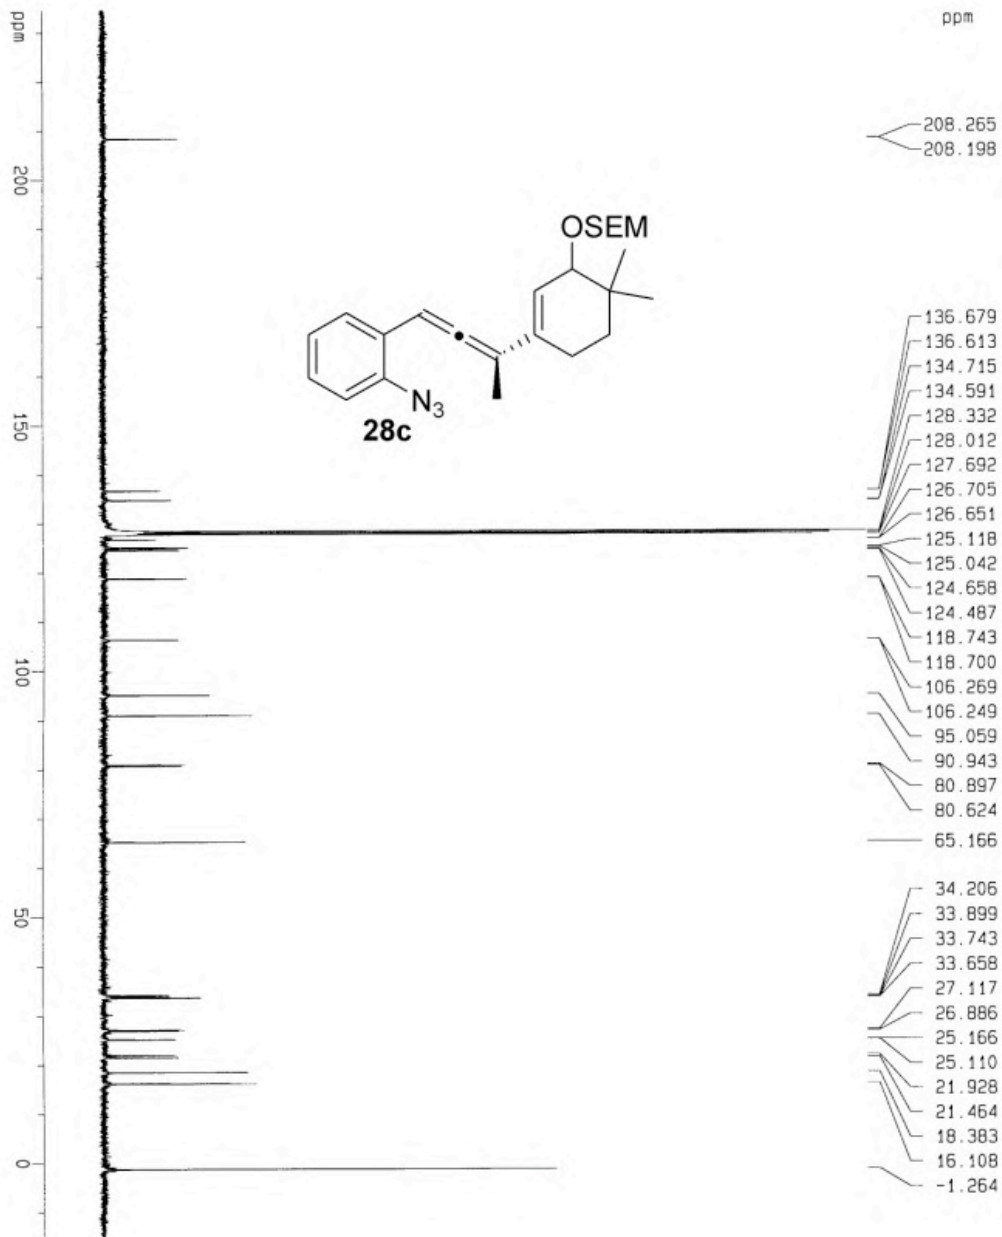

Current Data Parameters  
 NAME DKH3-140P  
 EXPNO 2  
 PROCNO 1

F2 - Acquisition Parameters  
 Date\_ 20060811  
 Time 15.11  
 INSTRUM spect  
 PROGNO 5 mm Multinu  
 PULPROG zgpg30  
 TD 65536  
 SOLVENT CDCl3  
 NS 215  
 DS 4  
 SMI 18932.383 Hz  
 FIDRES 0.287360 Hz  
 AQ 1.7400308 sec  
 RG 8192  
 DM 25.550 usec  
 DE 6.00 usec  
 TE 300.0 K  
 D1 2.00000000 sec  
 d11 0.03000000 sec  
 d12 0.00002000 sec

===== CHANNEL f1 =====  
 NUC1 13C  
 P1 11.80 usec  
 PL1 0.00 dB  
 SF01 75.4750200 MHz

===== CHANNEL f2 =====  
 CPDPRG2 waltz16  
 NUC2 1H  
 POCN2 110.00 usec  
 PL2 0.00 dB  
 PL12 17.50 dB  
 PL13 17.50 dB  
 SF02 300.1312005 MHz

F2 - Processing parameters  
 SI 32768  
 SF 75.4577321 MHz  
 KHM EM  
 SSB 0  
 LB 1.00 Hz  
 GB 0  
 PC 1.40

10 NMR plot parameters  
 CX 20.00 cm  
 F1p 234.592 ppm  
 F1 17704.11 Hz  
 F2p -14.951 ppm  
 F2 -1128.29 Hz  
 PPMCM 12.47712 ppm/cm  
 HZCM 941.61969 Hz/cm



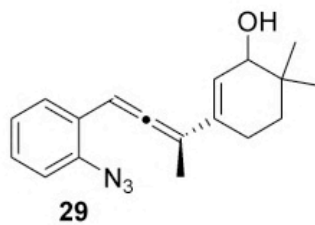

DKH3-132 Product yellow foam

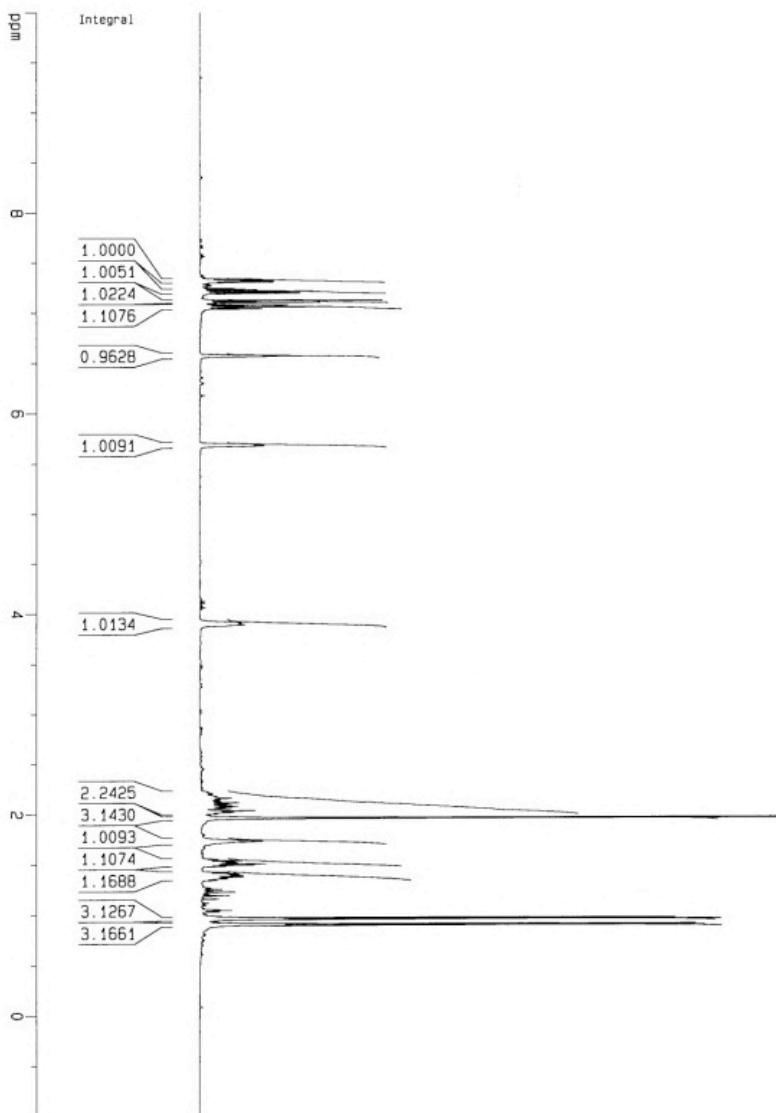

```

Current Data Parameters
NAME      DKH3-132P
EXPNO    1
PROCNO   1

F2 - Acquisition Parameters
Date_    20060721
Time     13.15
INSTRUM spect
PROBHD   5 mm BBI 1H-B
PULPROG zg30
TD       65536
SOLVENT  CDCl3
NS       16
DS       2
SWH      8278.146 Hz
FIDRES   0.126314 Hz
AQ       3.9986243 sec
RG       32
DM       60.400 usec
DE       6.00 usec
TE       300.0 K
D1       1.00000000 sec

===== CHANNEL f1 =====
NUC1     1H
P1       6.45 usec
PL1      0.00 dB
SF01     400.1324710 MHz

F2 - Processing parameters
SI       32768
SF       400.1300189 MHz
WDW      no
SSB      0
LB       0.00 Hz
GB       0
PC       1.00

1D NMR plot parameters
CX       20.00 cm
F1P      10.000 ppm
F1       4001.30 Hz
F2P      -1.000 ppm
F2       -400.13 Hz
PPOCKM   0.55000 ppm/cm
HZCKM    220.07150 Hz/cm
  
```

ppm

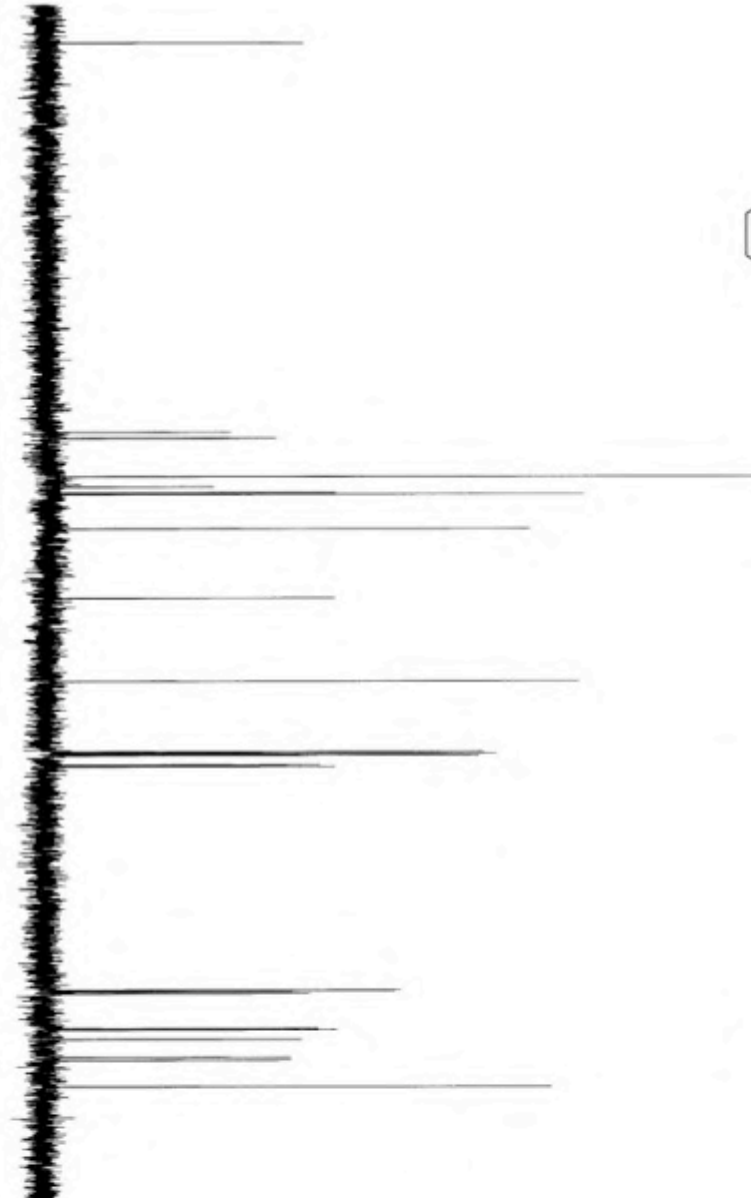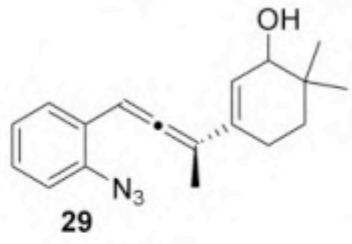

ppm  
207.852  
207.808

- 136.108
- 136.087
- 135.110
- 134.995
- 127.937
- 127.911
- 126.078
- 124.997
- 124.767
- 124.747
- 118.375
- 105.645
- 90.247
- 77.318
- 77.000
- 76.681
- 74.905
- 74.636
- 33.560
- 33.461
- 33.256
- 32.881
- 26.473
- 26.205
- 24.554
- 24.508
- 21.202
- 20.654
- 15.853

DKH3-132 Product

```

Current Data Parameters
NAME          DKH3-132P
EXPNO        2
PROCNO       1
-----
F2 - Acquisition Parameters
Date_        20060721
Time         13.23
INSTRUM     spect
PROBHD      5 mm BBI 5H-8
PULPROG     zgpg30
TD           65536
SOLVENT     CDCl3
NS           109
DS           4
SWH          29125.629 Hz
FIDRES       0.383387 Hz
AQ           1.3042164 sec
RG           8192
DM           18.300 usec
DE           6.00 usec
TE           300.0 K
D1           2.00000000 sec
D11          0.03000000 sec
D12          0.00020000 sec
-----
***** CHANNEL f1 *****
NUC1         13C
P1           16.35 usec
PL1         -6.00 dB
SFO1        100.6277959 MHz
-----
***** CHANNEL f2 *****
DPRGPRG2    waltz16
NUC2         1H
PCPD2       114.00 usec
PL2         0.00 dB
PL12        24.00 dB
PL13        24.00 dB
SFO2        400.1316000 MHz
-----
F2 - Processing parameters
SI           32768
SF           100.6127830 MHz
WDW          EM
SSB          0
LB           1.00 Hz
GB           0
PC           1.40
-----
10 MHz plot parameters
CX           20.00 cm
FSF          215.000 ppm
F1           21631.75 Hz
FSF          5.000 ppm
F2           -303.05 Hz
PRNCHN      11.00000 ppm/cm
HZCM        1106.74000 Hz/cm

```

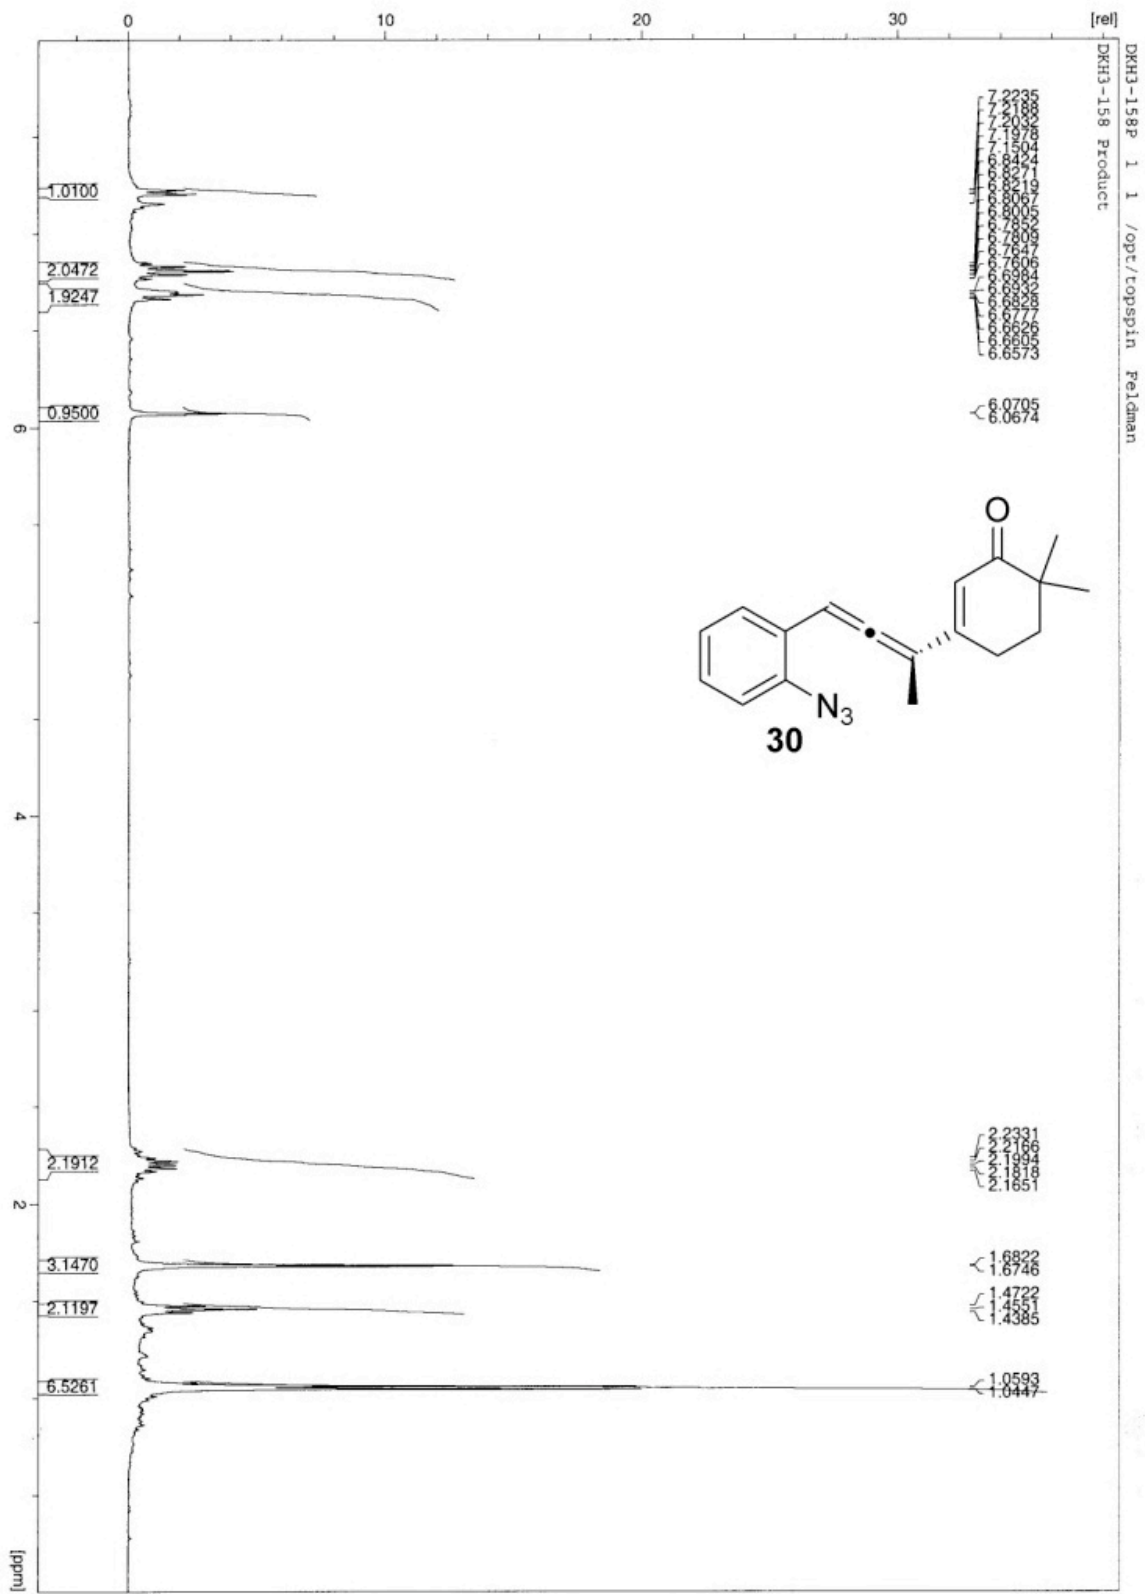

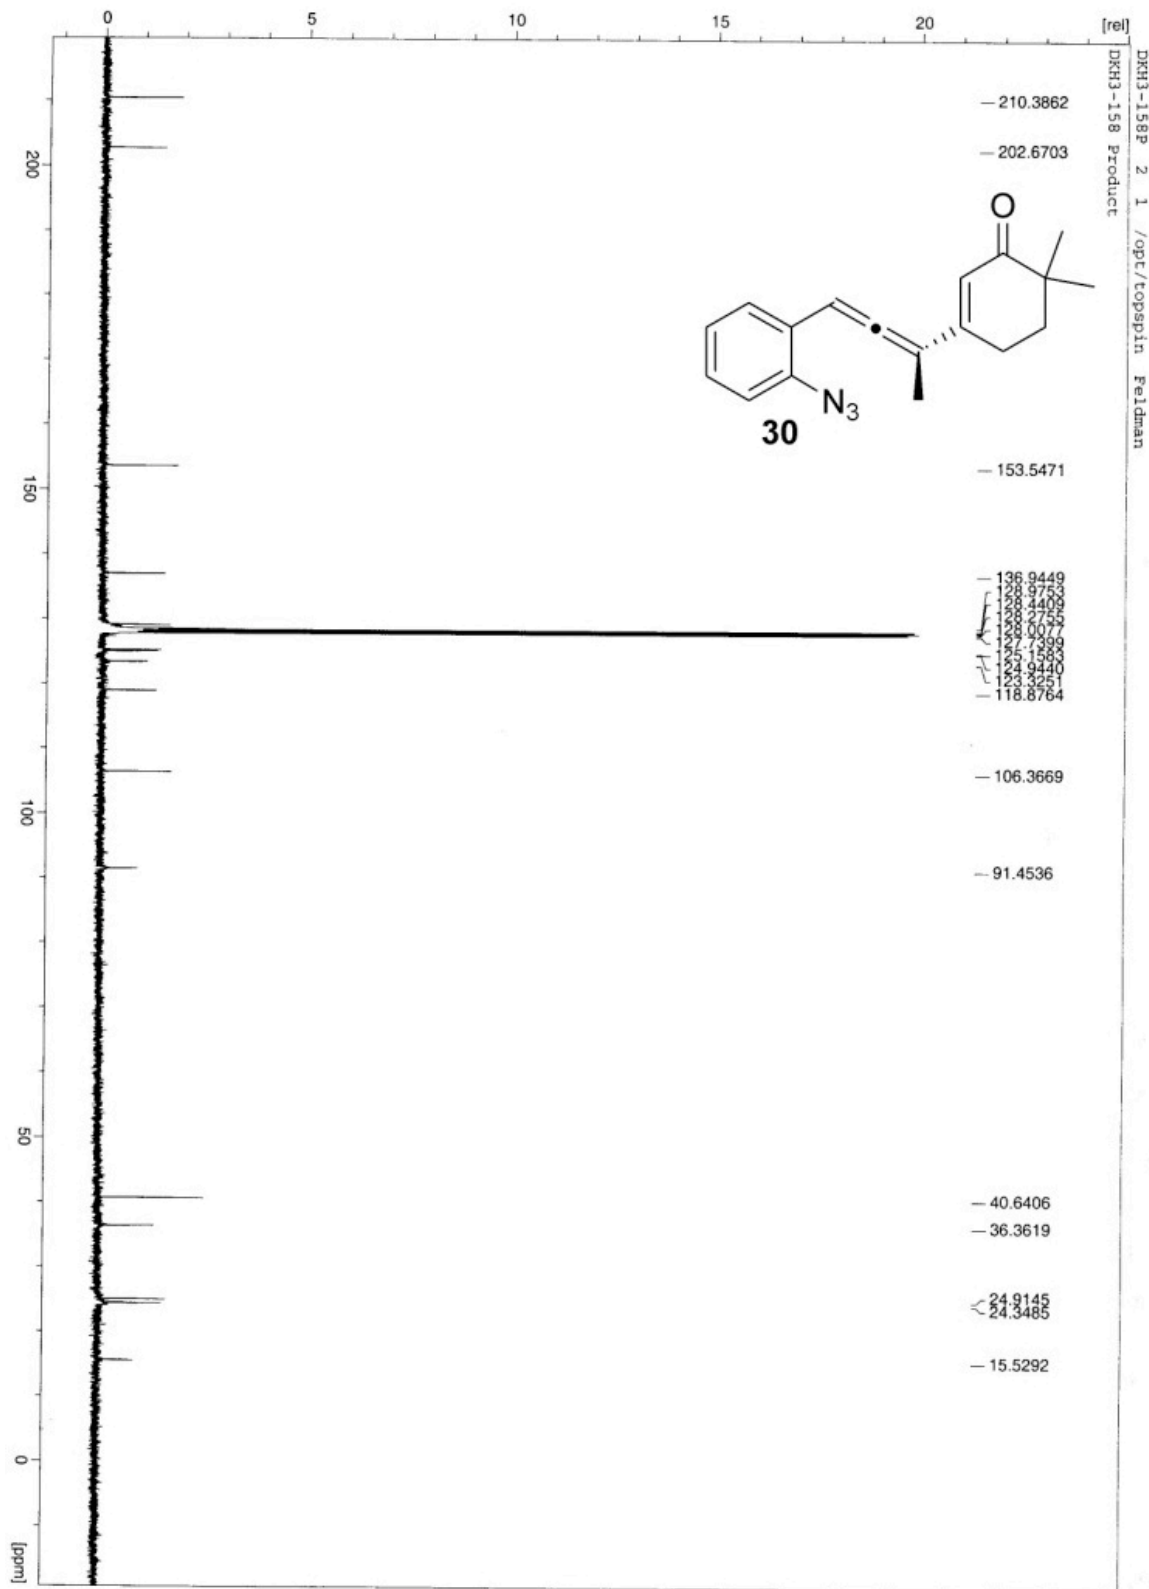

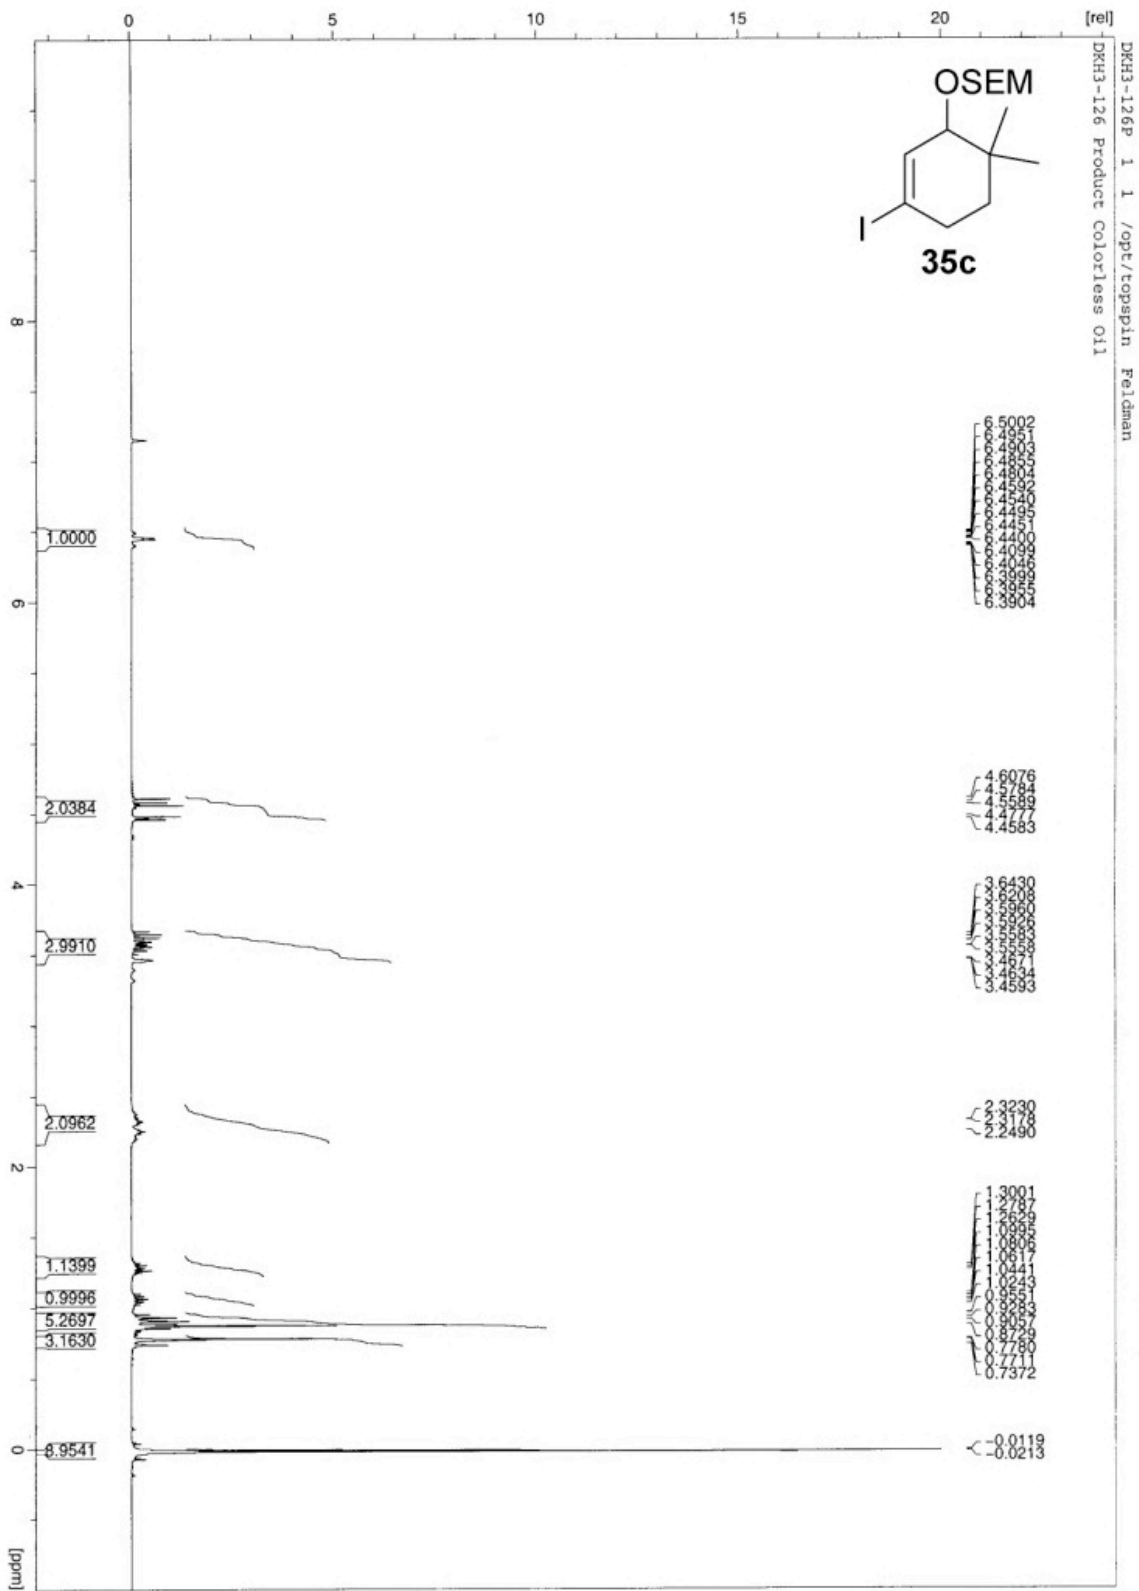

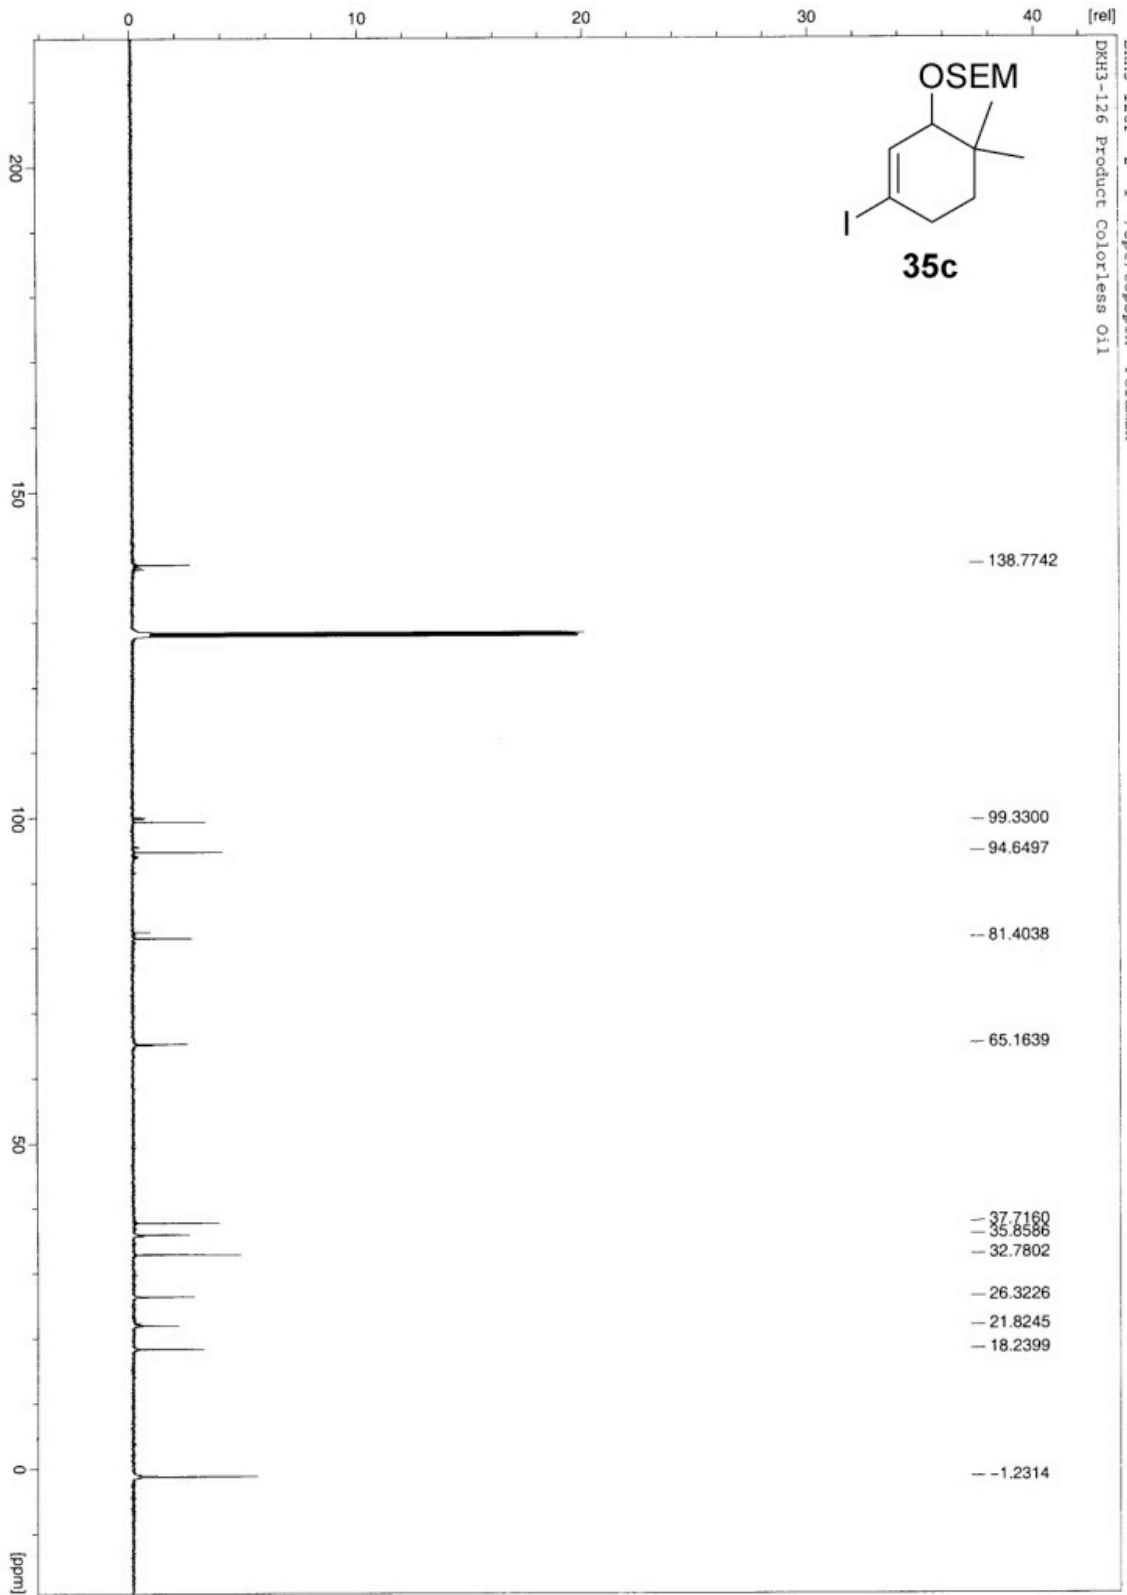

DKH5-111 P Yellow Oil

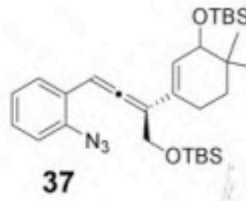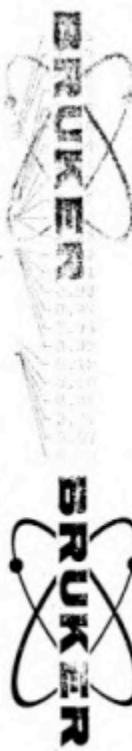

Current Data Parameters  
 NAME DKH5-111P  
 EXPNO 1  
 PROCNO 1

F2 - Acquisition Parameters  
 Date\_ 20070905  
 Time 13.57  
 INSTRUM spect  
 PROBRD 5 mm QNP 1H/15  
 PULPROG zg30  
 TD 65536  
 SOLVENT C6D6  
 NS 16  
 DS 2  
 SWH 7440.476 Hz  
 FIDRES 0.113533 Hz  
 AQ 4.4040694 sec  
 RG 50.8  
 DW 67.200 usec  
 DE 6.00 usec  
 TE 295.1 K  
 D1 1.00000000 sec  
 TD0 1

===== CHANNEL f1 =====  
 NUC1 1H  
 P1 14.93 usec  
 PL1 -3.00 dB  
 SFO1 360.1322240 MHz

F2 - Processing parameters  
 SI 32768  
 SP 360.1300484 MHz  
 WDW no  
 SSB 0  
 LB 0.00 Hz  
 GB 0  
 PC 1.00

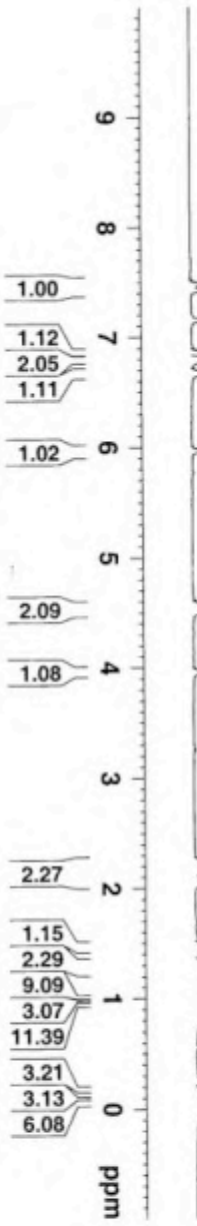

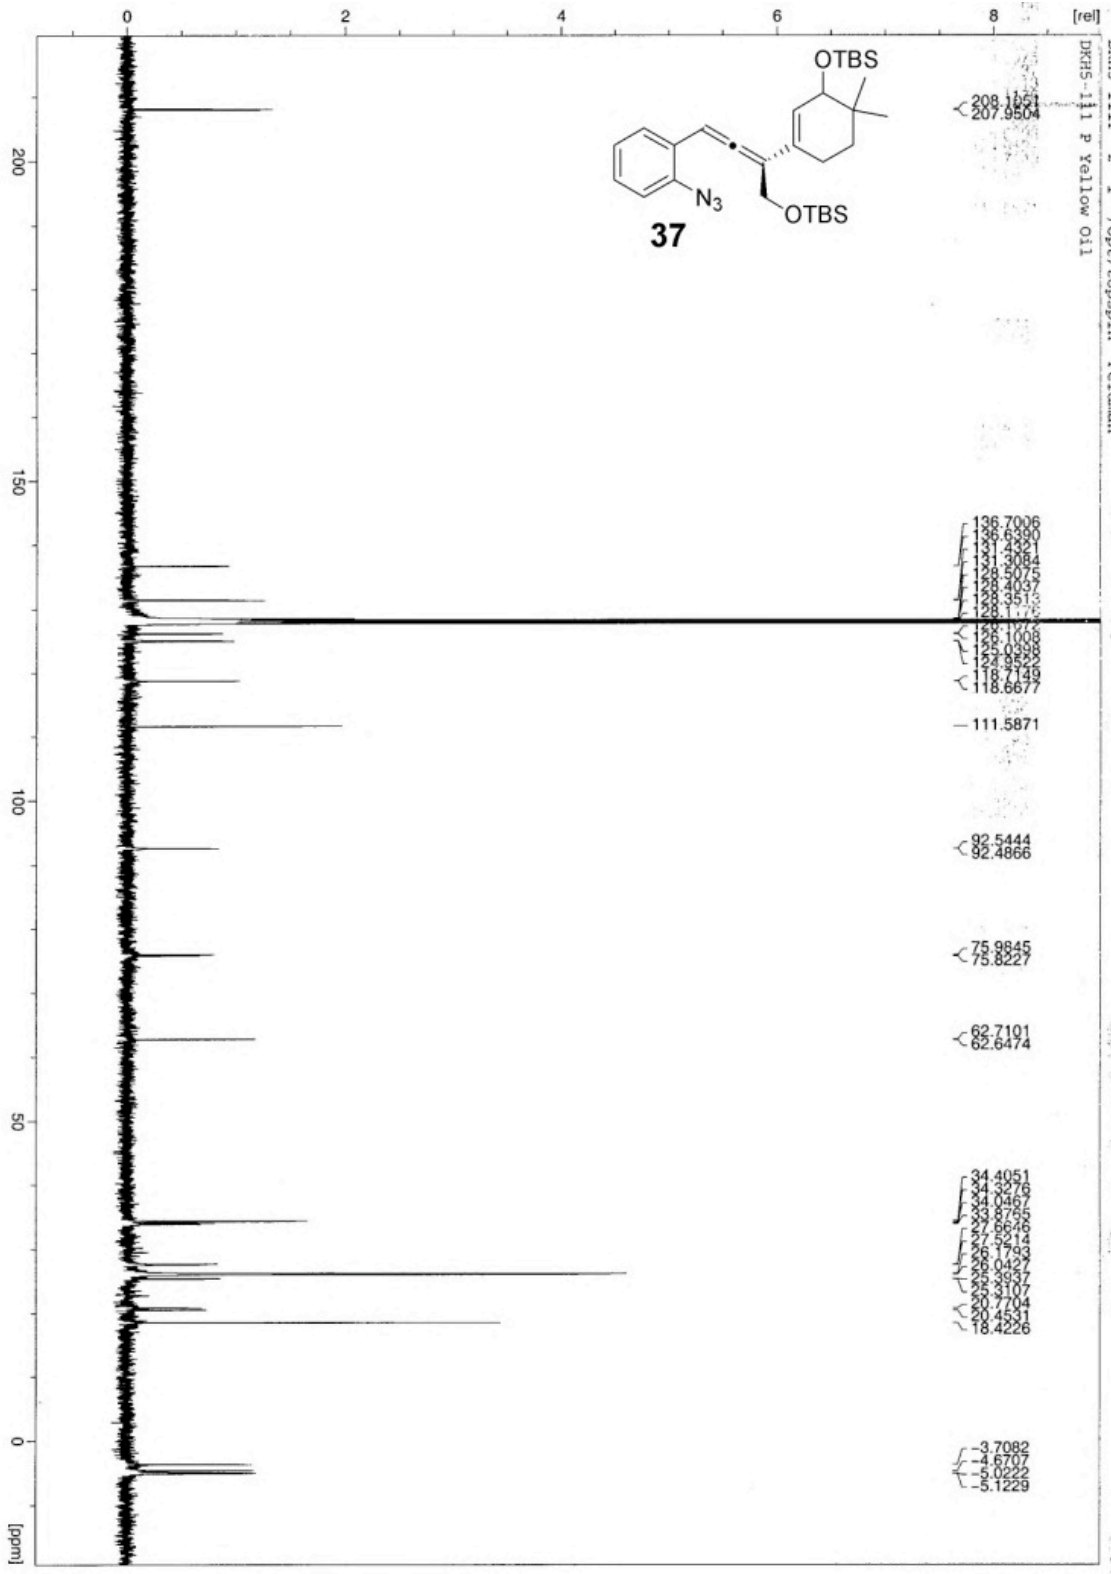



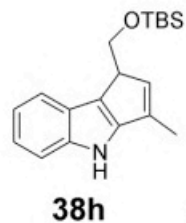

DKH5-221 "B" yellow 011

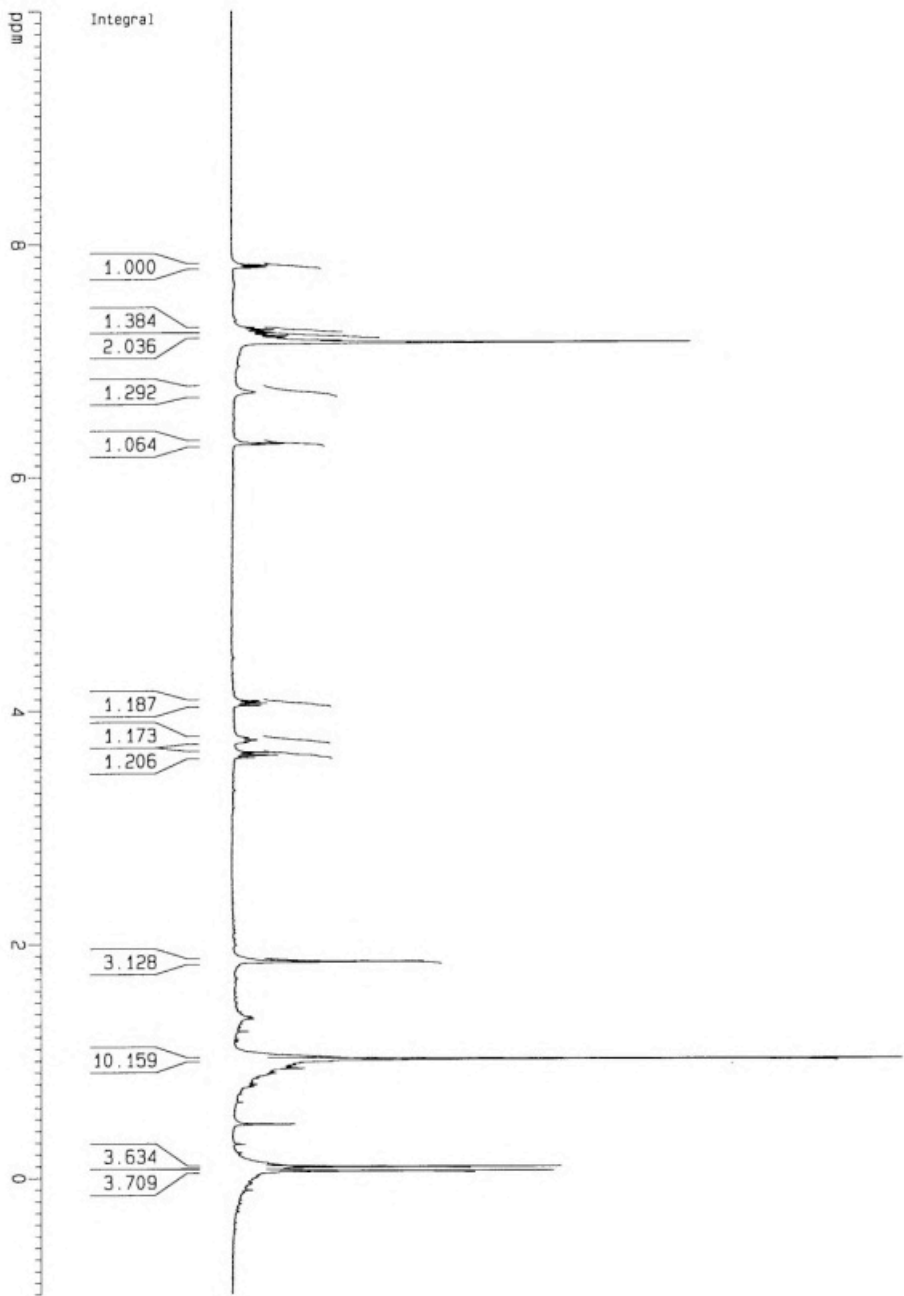

Current Data Parameters

|        |           |
|--------|-----------|
| NAME   | DKH5-221B |
| EXPNO  | 1         |
| PROCNO | 1         |

F2 - Acquisition Parameters

|         |                |
|---------|----------------|
| Date_   | 20071120       |
| Time    | 14.01          |
| INSTRUM | spect          |
| PROBHD  | 5 mm BBI 1H-8  |
| PULPROG | ZG30           |
| TD      | 65536          |
| SOLVENT | CDCl3          |
| DS      | 2              |
| SWH     | 8278.146 Hz    |
| FIDRES  | 0.126314 Hz    |
| AQ      | 3.9584243 sec  |
| RG      | 323.5          |
| DW      | 60.400 usec    |
| DE      | 6.00 usec      |
| TE      | 300.0 K        |
| D1      | 1.00000000 sec |

\*\*\*\*\* CHANNEL f1 \*\*\*\*\*

NUC1 1H

|      |                 |
|------|-----------------|
| P1   | 6.45 usec       |
| PL1  | 0.00 dB         |
| SFO1 | 400.1324710 MHz |

F2 - Processing parameters

|     |                 |
|-----|-----------------|
| SI  | 32768           |
| SF  | 400.1300471 MHz |
| WDW | no              |
| SSB | 0               |
| LB  | 0.00 Hz         |
| GB  | 0               |
| PC  | 1.00            |

1D NMR plot parameters

|       |                 |
|-------|-----------------|
| CX    | 20.00 cm        |
| F1p   | 10.000 ppm      |
| F1    | 4001.30 Hz      |
| F2p   | -1.000 ppm      |
| F2    | -400.13 Hz      |
| PPMCM | 0.55000 ppm/cm  |
| HZCM  | 220.07152 Hz/cm |

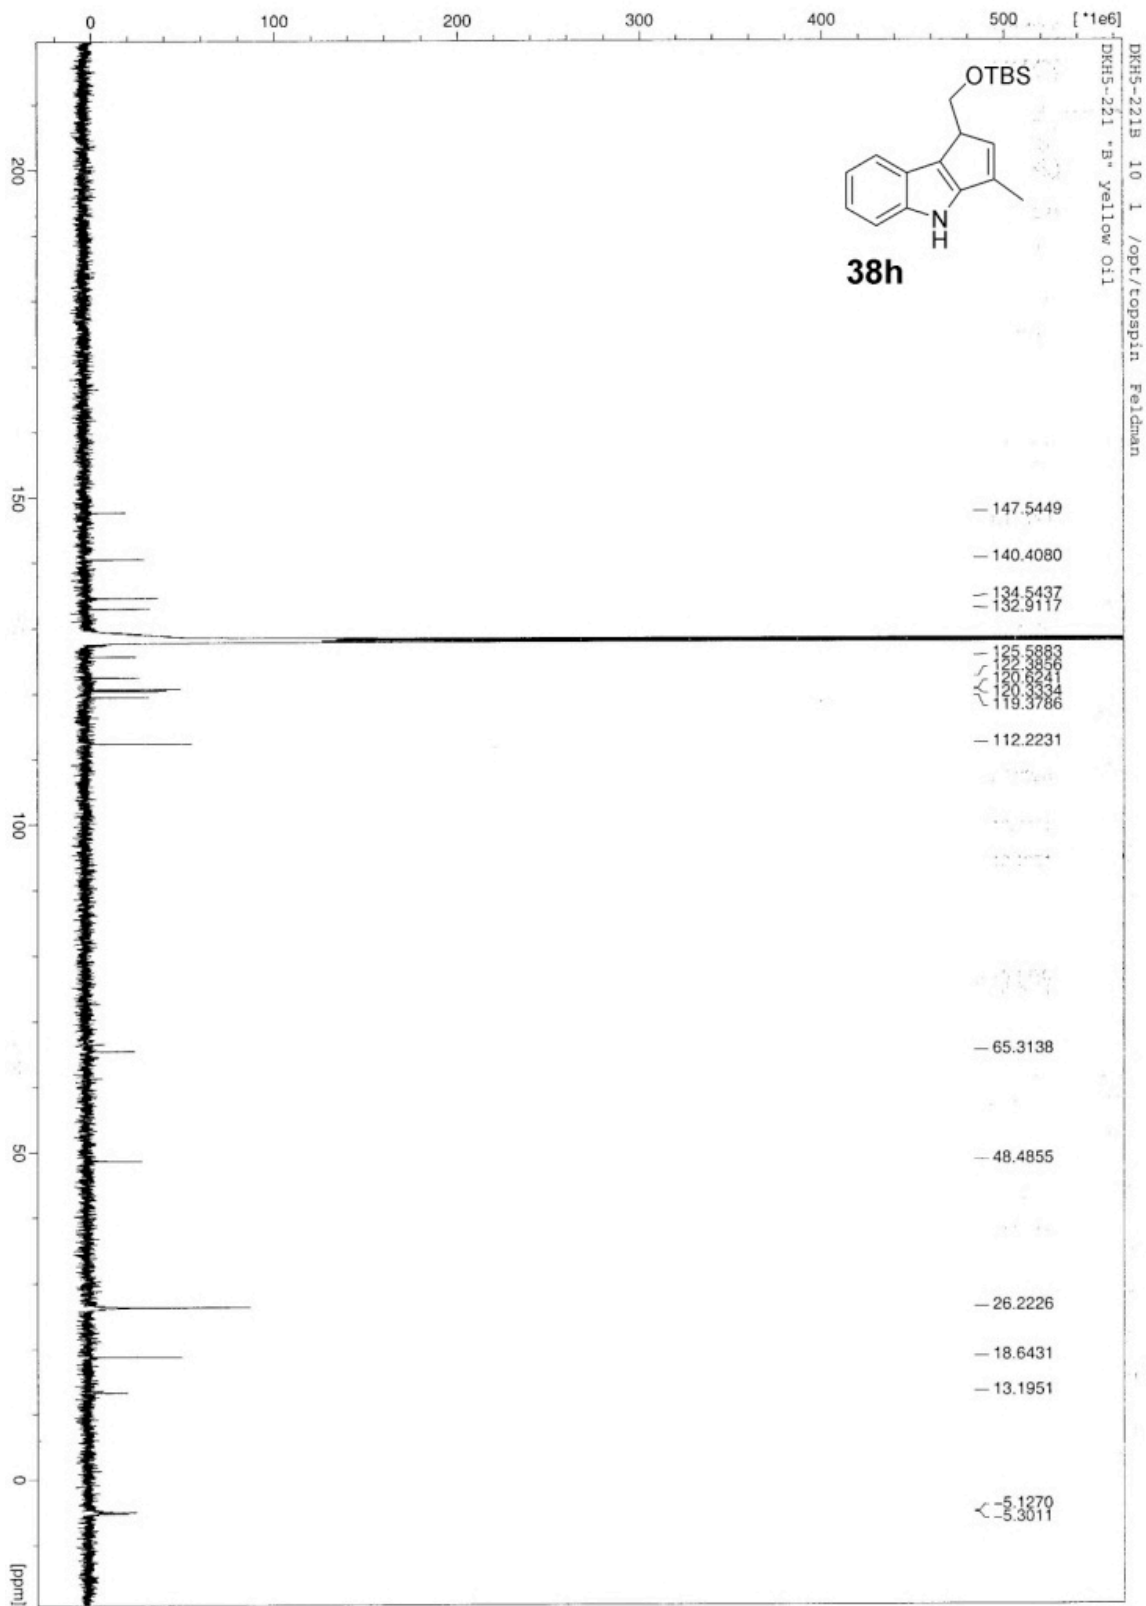

DKH6-86 "B" yellow oil

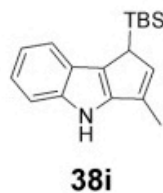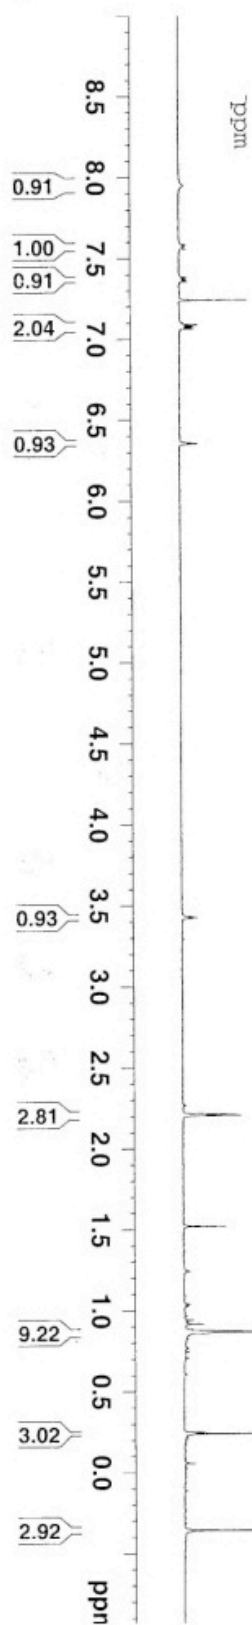

```

===== CHANNEL f1 =====
NUC1      1H
P1         14.93 us
PL1        -3.00 dB
SP01      360.1322240 MHz

F2 - Processing parameters:
SI          32768
SF         360.1300204 MHz
WDW         no
SSB         0
LB          0.00 Hz
GB          0
PC          1.00

===== CHANNEL f2 =====
Date_      20080224
Time_     12.55
INSTRUM   spect
PROBHD    5 mm QNP 1H/1
PULPROG   zgpg30
TD        65536
SOLVENT   CDCl3
NS         16
DS         2
SWH       7440.476 Hz
FIDRES    0.11531 Hz
AQ         4.4040594 sec
RG         812.7
DW         67.200 us
DE         6.00 us
TE         298.5 K
D1         1.00000000 sec
TDO        1
  
```

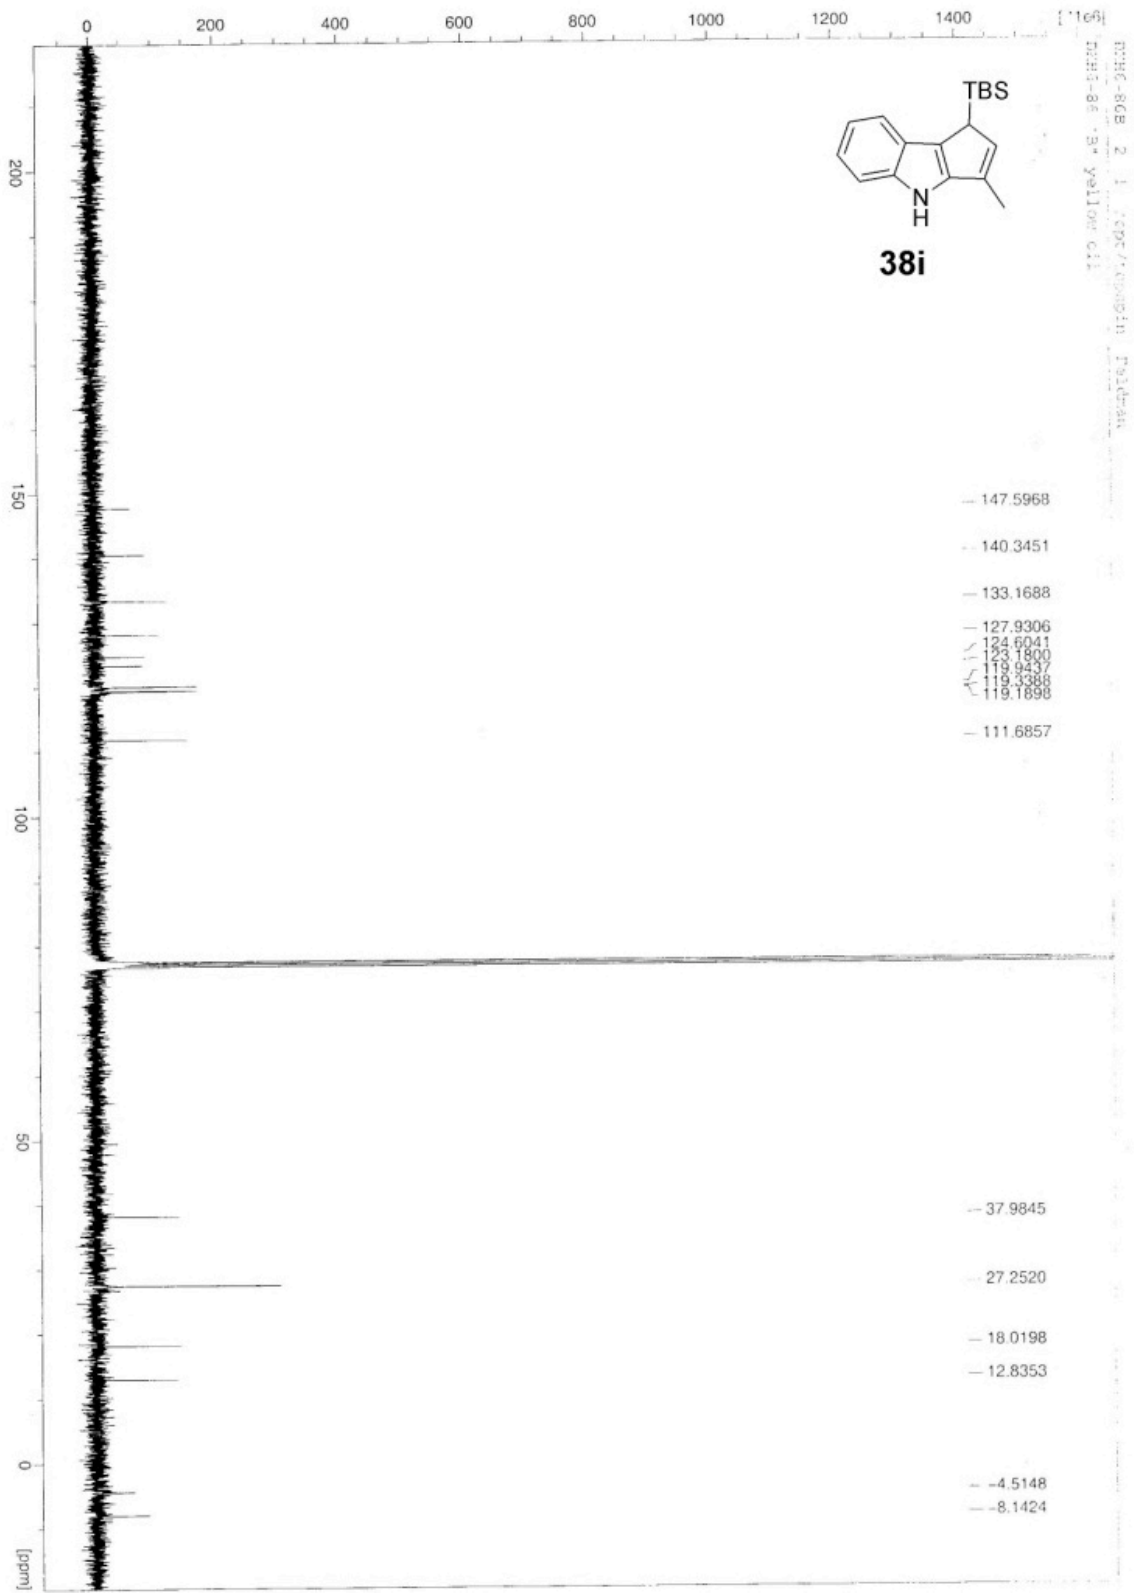

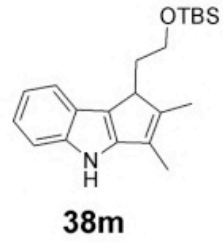

DKH6-94 "B" yellow 011

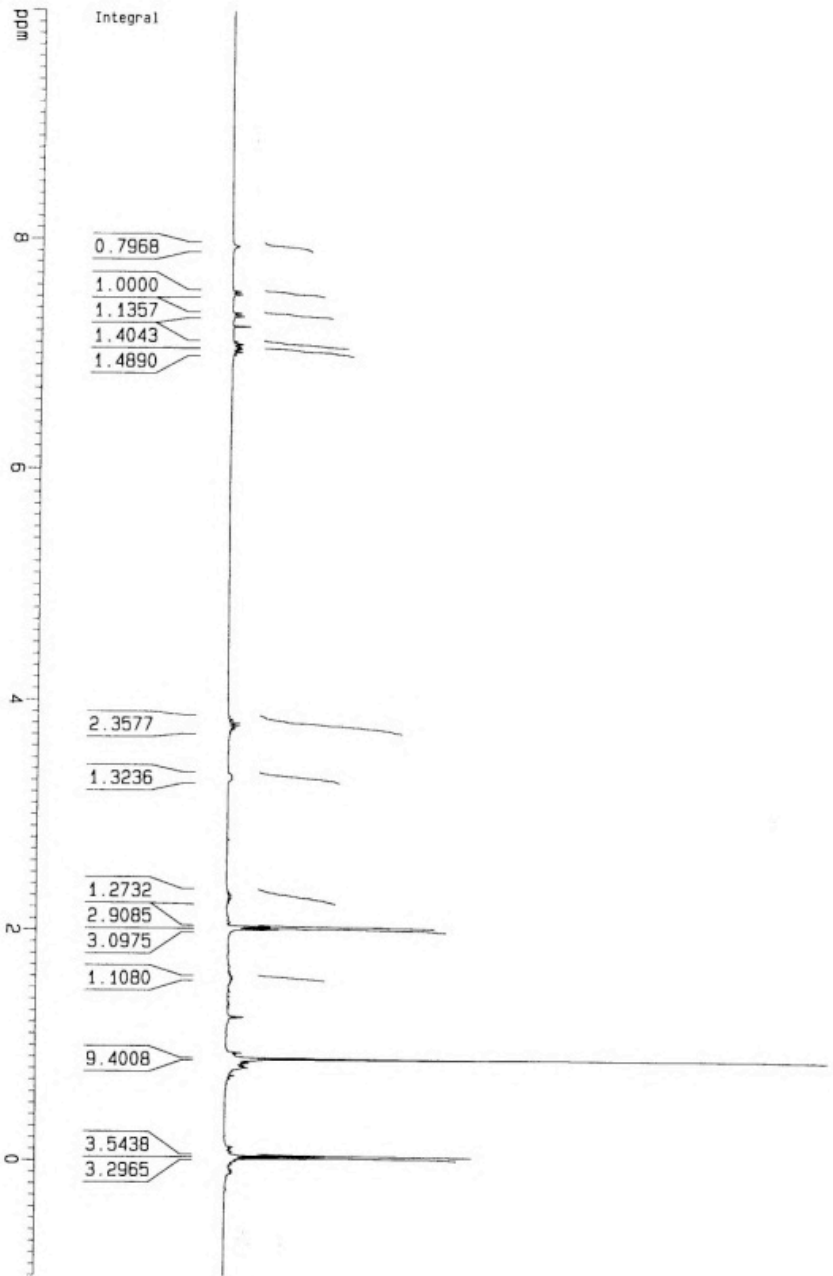

```

Current Data Parameters
NAME          DKH6-94B
EXPNO         1
PROCNO        1

F2 - Acquisition Parameters
Date_         20080304
Time          10.06
INSTRUM       spect
PROBHD        5 mm MUltinu
PULPROG       zg30
TD            65536
SOLVENT       CDCl3
NS            16
DS            2
SWH           6172.839 Hz
FIDRES        0.094190 Hz
AQ            5.3084650 sec
RG            256
DM            81.000 usec
DE            5.00 usec
TE            300.0 K
D1            1.000000000 sec

===== CHANNEL f1 =====
NUC1          1H
P1            9.60 usec
PL1           -6.00 dB
SFO1         300.1318534 MHz

F2 - Processing parameters
SI           32768
SF           300.1300120 MHz
KIDM         no
SSB          0
SGB          0
LB           0.00 Hz
GB           0
PC           1.00

10 NMR plot parameters
CX           20.00 cm
F1P         10.000 ppm
F1          3001.30 Hz
F2P         -1.000 ppm
F2          -300.13 Hz
PPM1CM      0.35000 ppm/cm
HZ1CM       165.07150 Hz/cm
  
```

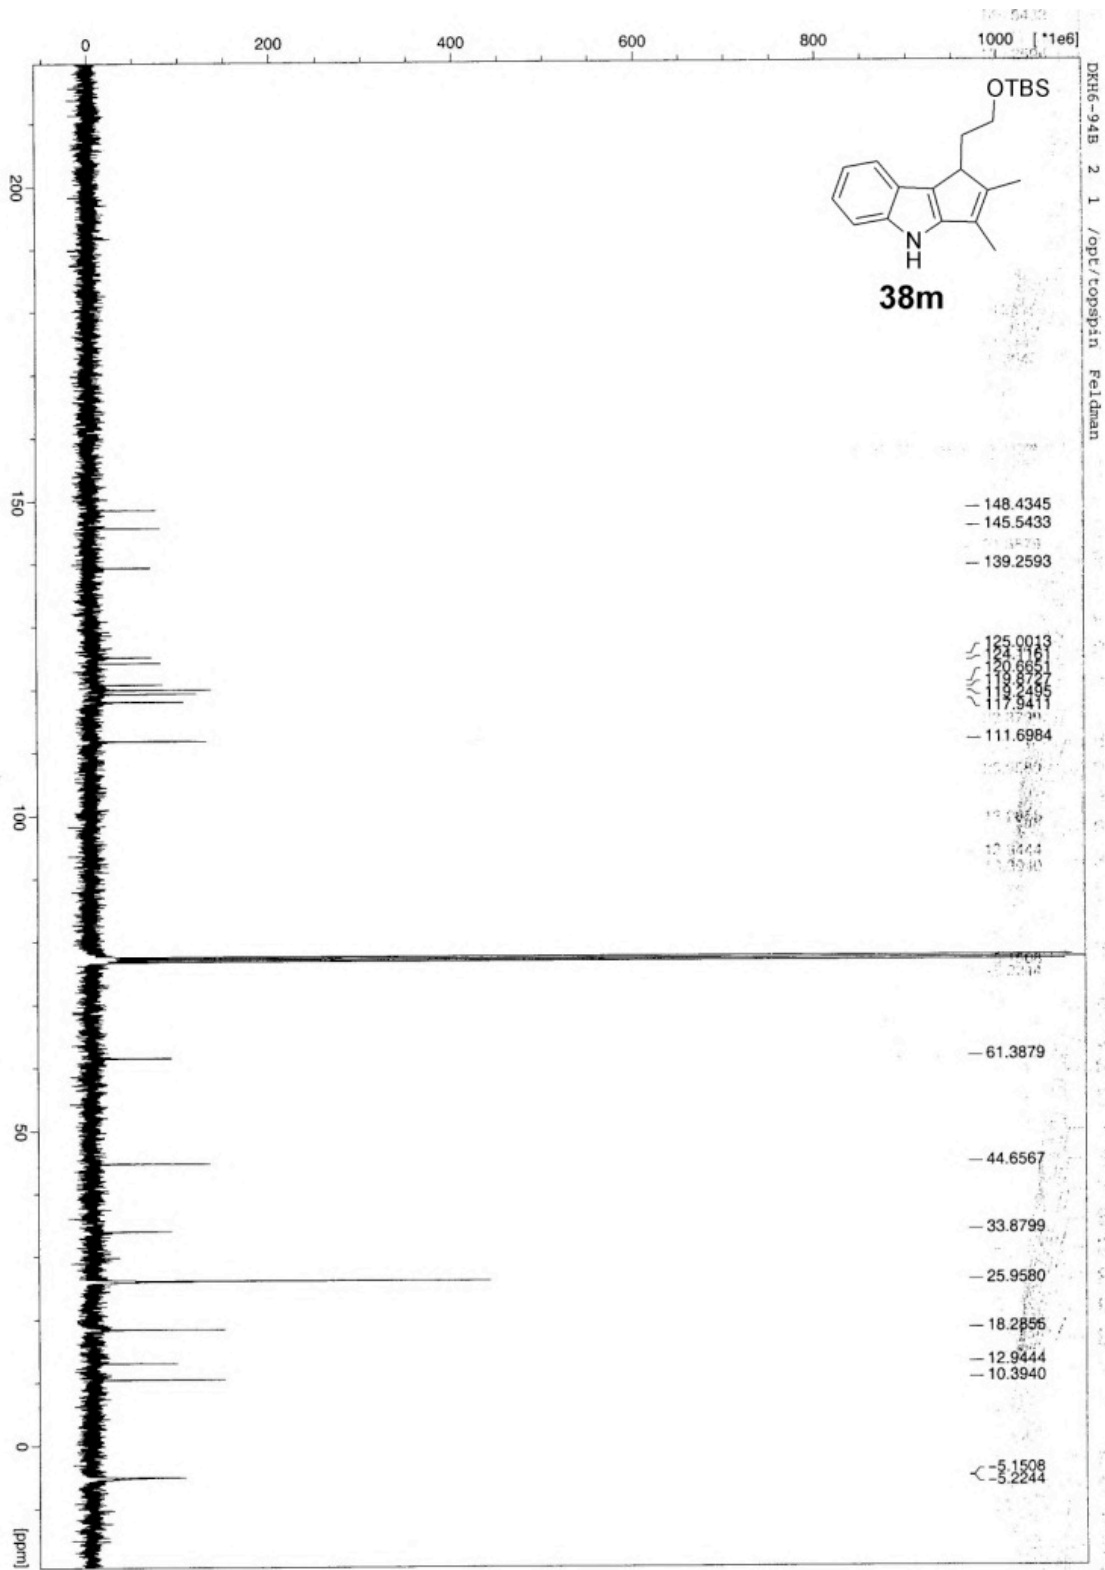

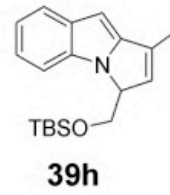

DKH5-221 "A" yellow 011

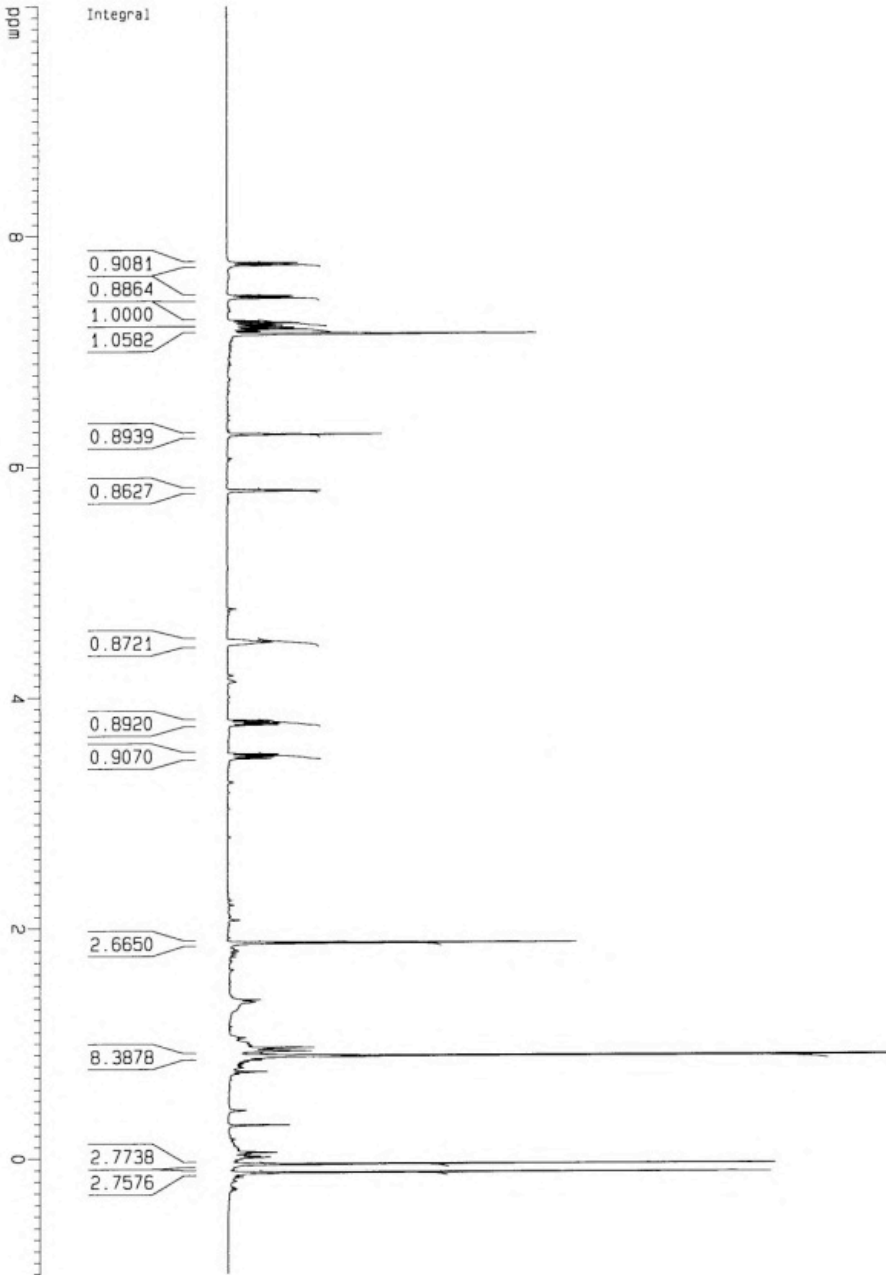

Current Data Parameters  
 NAME DKH5-221A  
 EXPNO 1  
 PROCNO 1

F2 - Acquisition Parameters  
 Date\_ 20071120  
 Time 13:55  
 INSTRUM spect  
 PROBHD 5 mm BBI 1H-B  
 PULPROG zg30  
 TD 65536  
 SOLVENT CDCl3  
 NS 16  
 DS 2  
 SMH 8278.146 Hz  
 FIDRES 0.126314 Hz  
 AQ 3.9584243 sec  
 RG 181  
 DM 60.400 usec  
 DE 6.00 usec  
 TE 300.0 K  
 D1 1.00000000 sec

\*\*\*\*\* CHANNEL f1 \*\*\*\*\*  
 NUC1 1H  
 P1 6.45 usec  
 PL1 0.00 dB  
 SF01 400.1324710 MHz

F2 - Processing parameters  
 SI 32768  
 SF 400.1300473 MHz  
 KDM no  
 SSB 0  
 LB 0.00 Hz  
 GB 0  
 PC 1.00

10 NMR plot parameters  
 CX 20.00 cm  
 F1P 10.000 ppm  
 F1 4001.30 Hz  
 F2P -1.000 ppm  
 F2 -400.13 Hz  
 PRCKM 0.55000 ppm/  
 HZCM 220.07152 Hz/c

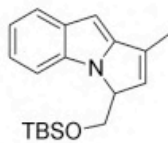

39h

ppm

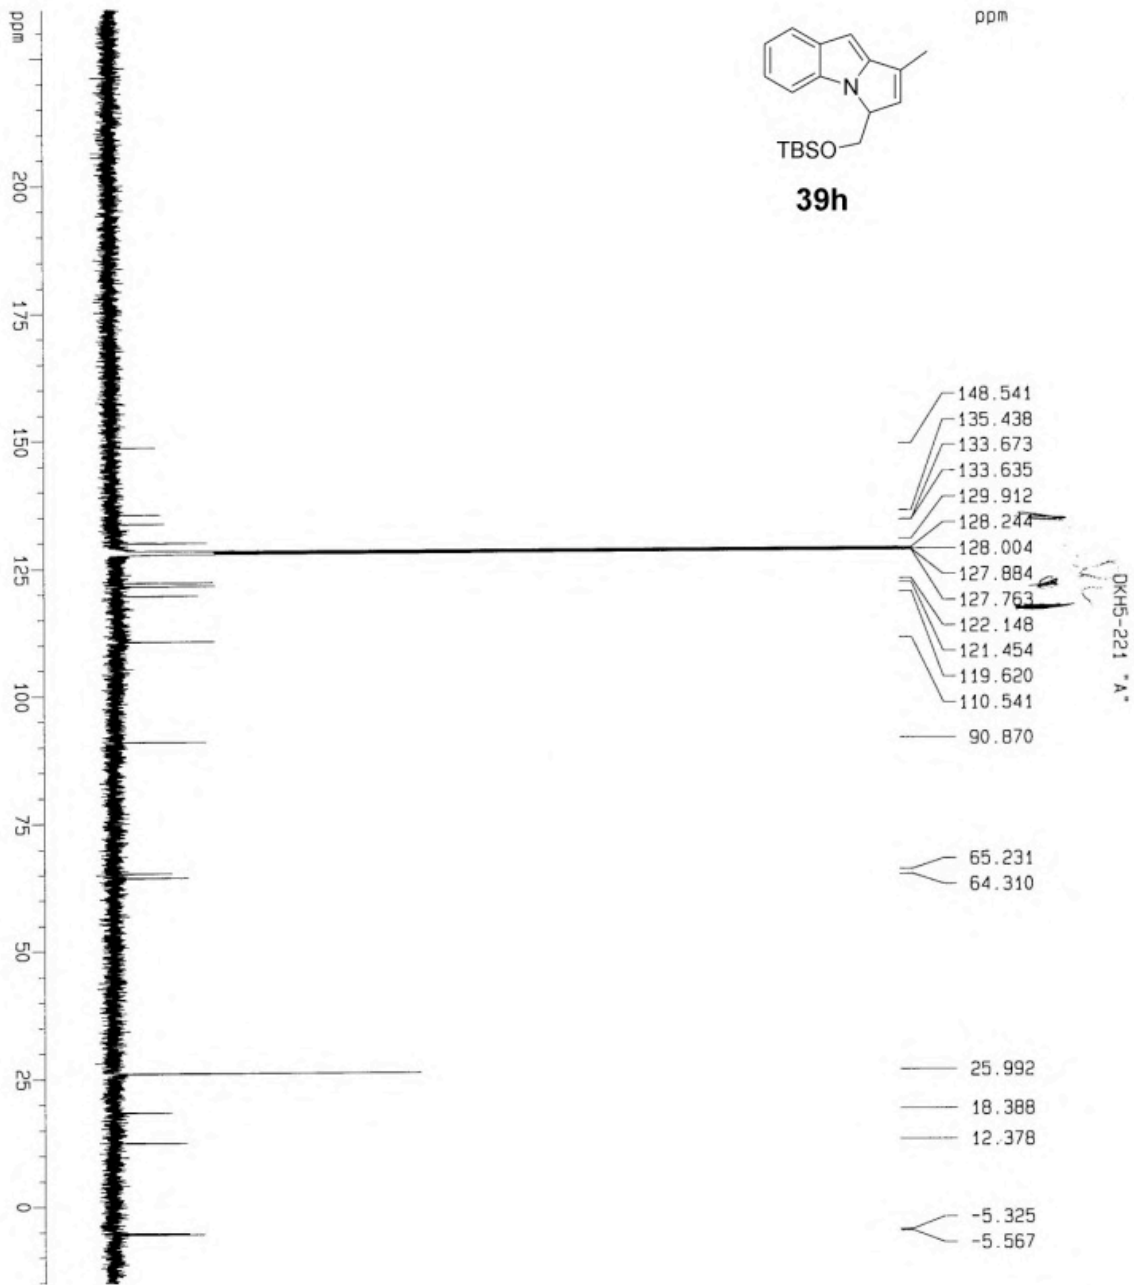

DKH5-221 "A"

```

Current Data Parameters
NAME      DKH5-221A
EXPNO     2
PROCNO    1

F2 - Acquisition Parameters
Date_     20071120
Time      14.13
INSTRUM   spect
PROBHD    5 mm BBI 1H-B
PULPROG   zgpg30
TD         65536
SOLVENT   CSO6
NS         630
DS         4
SWH        25125.629 HZ
FIDRES     0.383387 HZ
AQ         1.3042164 sec
RG         13004
DM         19.900 usec
DE         6.00 usec
TE         300.0 K
D1         2.00000000 sec
d11        0.03000000 sec
d12        0.00002800 sec

===== CHANNEL f1 =====
NUC1       13C
P1         18.35 usec
PL1        -6.00 dB
SF01       100.627959 MHz

===== CHANNEL f2 =====
CQPRPG2    waltz16
NUC2       1H
PCPRP2     114.00 usec
PL2        0.00 dB
PL12       24.00 dB
PL13       24.00 dB
SF02       400.1318005 MHz

F2 - Processing parameters
SI         32768
SF         100.6127485 MHz
MID4       EM
SSB        0
LB         1.00 Hz
GB         0
PC         1.40

1D NMR plot parameters
CX         20.00 cm
F1P        234.664 DDM
F1         23610.19 Hz
F2P        -15.062 ppm
F2         -1515.44 Hz
PPHCKM     12.48630 ppm/cm
HZCK       1256.28137 Hz/cm
  
```



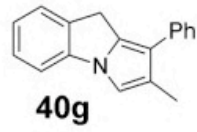

DKH6-174 "A" White Solid

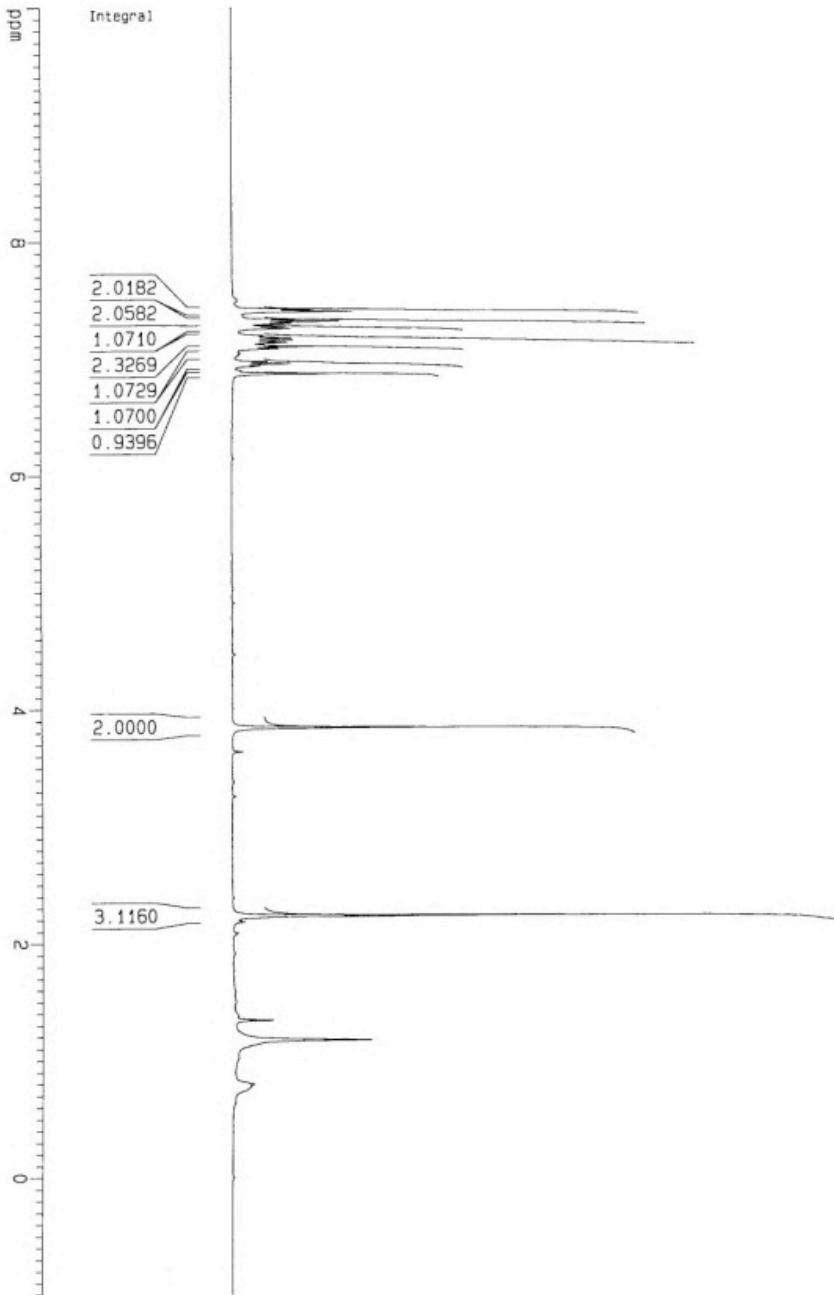

```

Current Data Parameters
NAME      DKH6-174A
EXPNO    1
PROCNO   1

F2 - Acquisition Parameters
Date_    20080617
Time     15.04
INSTRUM  spect
PROBHD   5 mm BBI 1H-B
PULPROG  zg30
TD        65536
SOLVENT  CDCl3
NS        16
DS        2
SWH       8278.146 Hz
FIDRES   0.126314 Hz
AQ        3.9584243 sec
RG        57
DM        60.400 usec
DE        6.00 usec
TE        300.0 K
D1        1.00000000 sec

***** CHANNEL f1 *****
NUC1      1H
P1        6.45 usec
PL1       0.00 dB
SF01      400.1324710 MHz

F2 - Processing parameters
SI        32768
SF        400.1300741 MHz
KCM       no
SSB       0
LB        0.00 Hz
GB        0
PC        1.00

1D NMR plot parameters
CX        20.00 ppm
F1P       10.000 ppm
F1        4001.30 Hz
F2P       -1.000 ppm
F2        -400.13 Hz
PPMCM    0.55000 ppm/cm
HZCM     220.07153 Hz/cm
  
```

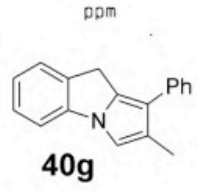

DKH6-174 "A"

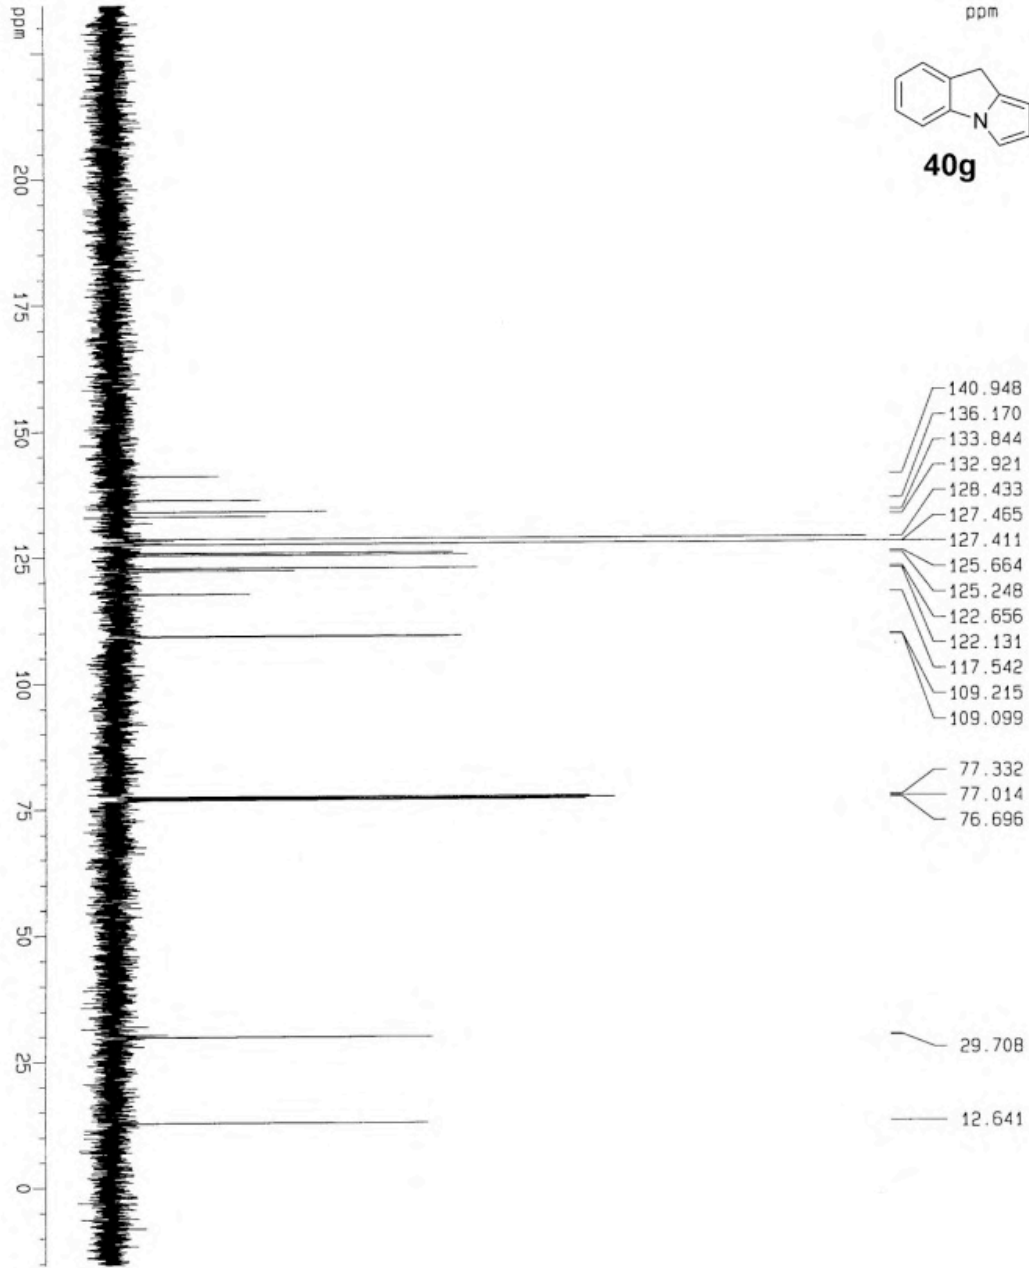

```

Current Data Parameters
NAME          DKH6-174A
EXPNO         2
PROCNO        1
F2 - Acquisition Parameters
Date_         20080517
Time          15.09
INSTRUM       spect
PROBHD        5 mm BBI 1H-B
PULPROG       zgpg30
TD            65536
SOLVENT       CDCl3
NS            122
DS            4
SMH           25125.629 Hz
FIDRES        0.383397 Hz
AQ            1.3042164 sec
RG            16384
DM            19.500 usec
DE            6.00 usec
TE            300.0 K
D1            2.00000000 sec
d11           0.03000000 sec
d12           0.00002000 sec

***** CHANNEL f1 *****
NUC1          13C
P1            16.35 usec
PL1           -6.00 dB
SFO1         100.6237959 MHz

***** CHANNEL f2 *****
CPDPRG2       waltz16
NUC2          1H
PCPD2        114.00 usec
PL2           0.00 dB
PL12         24.00 dB
PL13         24.00 dB
SFO2         400.1318005 MHz

F2 - Processing parameters
SI            32768
SF            100.6177786 MHz
KOH           EM
SSB           0
LB            1.00 Hz
GB            0
PC            1.40

10 NMR plot parameters
CX            20.00 cm
F1P           234.365 ppm
F1            23980.13 Hz
F2P           -15.361 ppm
F2            -1545.49 Hz
PPHVCN       12.48630 ppm/cm
HZCM         1256.88137 Hz/cm

```

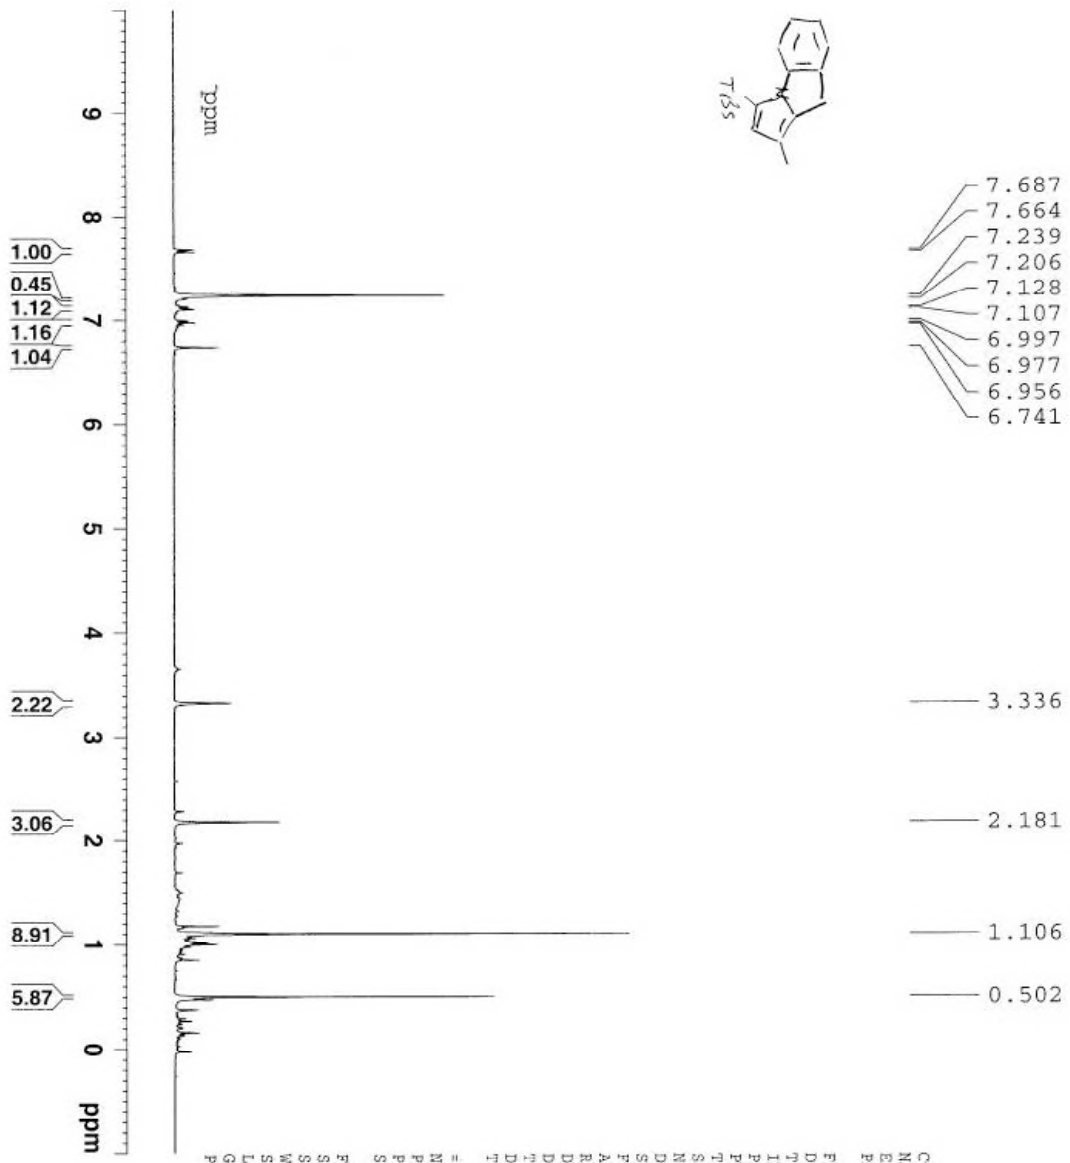

PSM-I-234

Spot 1

Current Data Parameters  
 NAME PJM031809  
 EXPNO 1  
 PROCNO 1

F2 - Acquisition Parameters  
 Date\_ 20090318  
 Time 14.50

INSTRUM spect  
 PROBD 5 mm QNP 1H/15  
 PULPROG zg30  
 TD 65536  
 SOLVENT CDCl3  
 NS 16  
 DS 2  
 SWH 7440.476 Hz  
 FIDRES 0.113533 Hz  
 AQ 4.4040694 sec  
 RG 362  
 DW 67.200 usec  
 DE 6.00 usec  
 TE 298.0 K  
 D1 1.00000000 sec  
 TDO 1

==== CHANNEL F1 =====  
 NUC1 1H  
 P1 14.93 usec  
 PL1 -3.00 dB  
 SFO1 360.1322240 MHz

F2 - Processing Parameters  
 SI 32768  
 SF 360.1300152 MHz  
 MDW no  
 SSB 0  
 LB 0.00 Hz  
 GB 0  
 PC 1.00

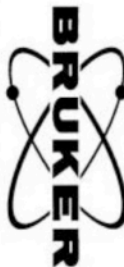

Current Data Parameters  
NAME pjm031809  
EXNO 2  
PROCNO 1

P2 - Acquisition Parameters

Date\_ 20090318  
Time 15.06  
INSTRUM spect  
PROBHD 5 mm QNP 1H/15  
PULPROG zgpg30  
TD 65536  
SOLVENT CDCl3  
NS 1024  
DS 4  
SFR 21645.021 Hz  
FIDRES 0.330277 Hz  
AQ 1.5139316 sec  
RG 18390.4  
DW 23.100 usec  
DE 6.00 usec  
TE 298.0 K  
D1 2.00000000 sec  
d11 0.03000000 sec  
DELTA 1.89999998 sec  
TD0 1

==== CHANNEL f1 =====

NUC1 13C  
P1 7.68 usec  
PL1 -3.00 dB  
SFO1 90.5638160 MHz

==== CHANNEL f2 =====

CPDPRG2 waltz16  
NUC2 1H  
PCPD2 110.00 usec  
PL2 -1.00 dB  
PL12 20.74 dB  
PL13 16.10 dB  
SFO2 360.1314405 MHz

P2 - Processing parameters

SI 32768  
SF 90.5547451 MHz  
WDW EM  
SSB 0  
LB 1.00 Hz  
GB 0  
PC 1.40

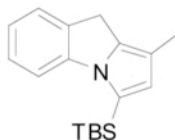

40 i

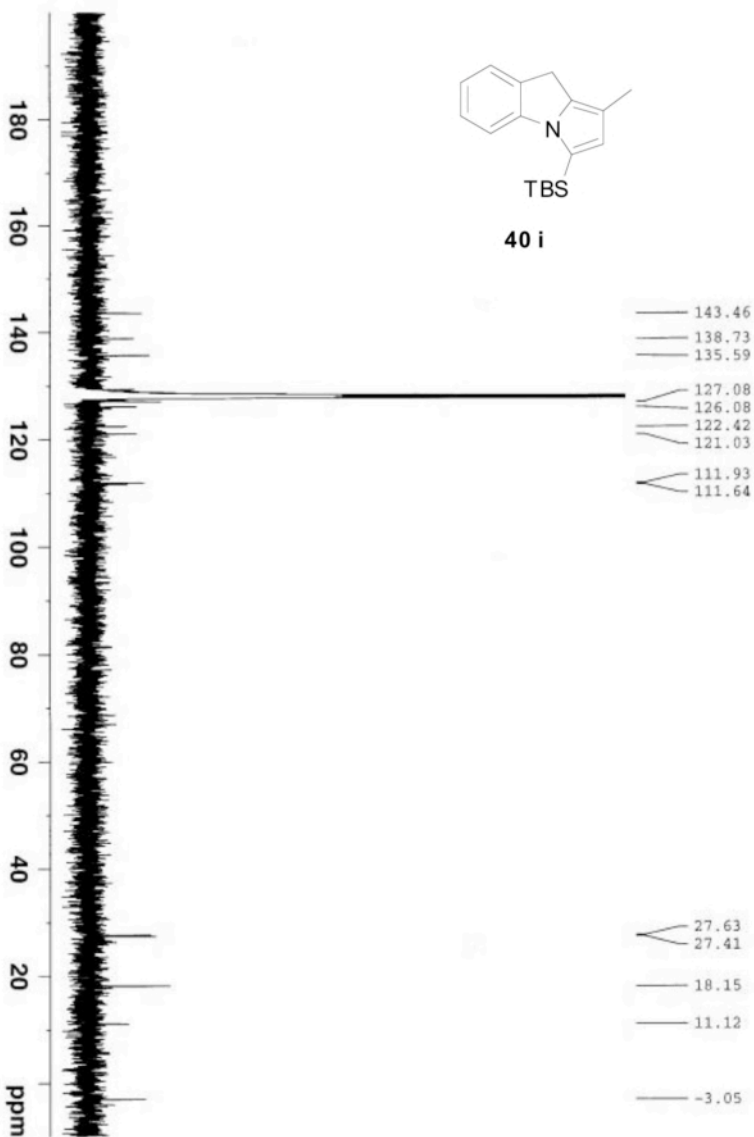

pjm-I-236 spot 1 repur

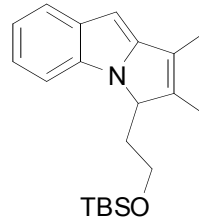

40 m

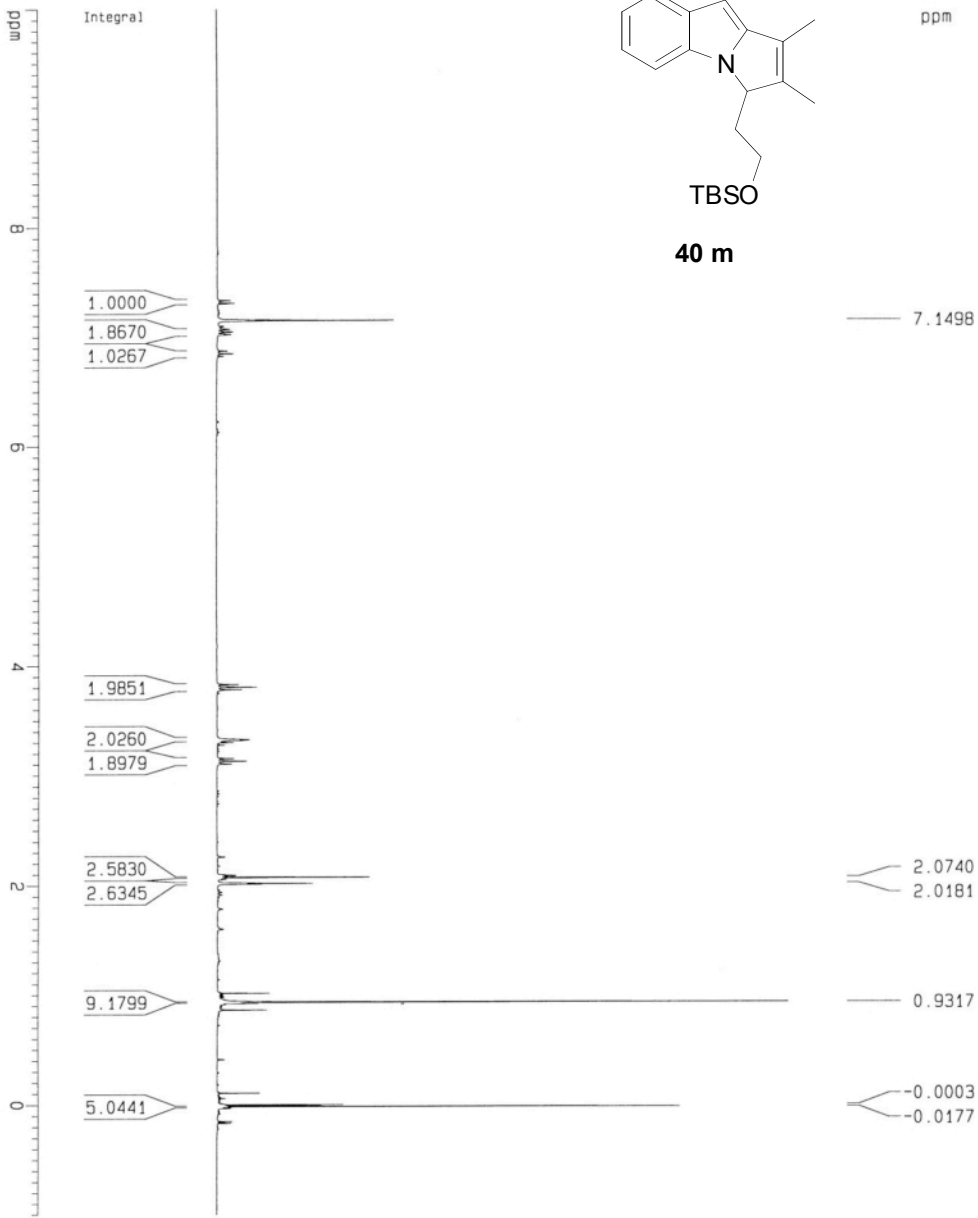

Current Data Parameters  
 NAME: pjm032009  
 EXPNO: 1  
 PROCNO: 1

F2 - Acquisition Parameters  
 Date\_: 20090320  
 Time: 12.07  
 INSTRUM: spect  
 PROCNO: 5  
 PULPROG: zg30  
 TO: 65536  
 SOLVENT: CDCl3  
 NS: 32  
 DS: 2  
 SWH: 6172.839 Hz  
 FIDRES: 0.094190 Hz  
 AQ: 5.3084650 sec  
 RG: 203.2  
 DM: 81.000 usec  
 DE: 6.00 usec  
 TE: 300.0 K  
 D1: 1.00000000 sec

----- CHANNEL f1 -----  
 NUC1: 1H  
 P1: 11.70 usec  
 PL1: 0.00 dB  
 SF01: 299.8718518 MHz

F2 - Processing parameters  
 SI: 32768  
 SF: 299.8700382 MHz  
 MDM: no  
 SSB: 0  
 LB: 0.00 Hz  
 GB: 0  
 PC: 1.00

1D NMR plot parameters  
 CX: 20.00 cm  
 F1P: 10.000 ppm  
 F1: 2998.70 Hz  
 F2P: -1.000 ppm  
 F2: -299.87 Hz  
 PPMCK: 0.55000 ppm/cm  
 HZCK: 164.92851 Hz/cm



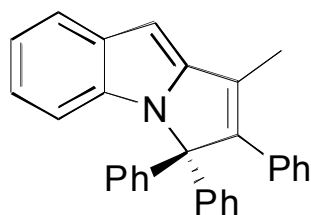

A colorless rod shaped crystal of **39n** ( $2(C_{30}H_{23}N), C_5H_{12}$ ) with approximate dimensions 0.13 x 0.14 x 0.29 mm, was used for the X-ray crystallographic analysis. The X-ray intensity data were measured at 298(2) K, cooled by Rigaku-MSX X-Stream 2000, on a Bruker SMART APEX CCD area detector system equipped with a graphite monochromator and a MoK $\alpha$  fine-focus sealed tube ( $\lambda = 0.71073\text{\AA}$ ) operated at 1600 watts power (50 kV, 32 mA). The detector was placed at a distance of 5.8 cm from the crystal.

A total of 1850 frames were collected with a scan width of  $0.3^\circ$  in  $\omega$  and an exposure time of 20 seconds/frame. The total data collection time was about 14 hours. The frames were integrated with the Bruker SAINT software package using a narrow-frame integration algorithm. The integration of the data using a Triclinic unit cell yielded a total of 9890 reflections to a maximum  $\theta$  angle of  $28.48^\circ$  ( $0.90\text{\AA}$  resolution), of which 5970 were independent, completeness = 97.1%,  $R_{\text{int}} = 0.0364$ ,  $R_{\text{sig}} = 0.0778$  and 2909 were greater than  $2\sigma(I)$ . The final cell constants:  $a = 10.254(8)\text{\AA}$ ,  $b = 10.743(8)\text{\AA}$ ,  $c = 12.090(9)\text{\AA}$ ,  $\alpha = 97.948(13)^\circ$ ,  $\beta = 106.727(13)^\circ$ ,  $\gamma = 102.782(13)^\circ$ , volume =  $1214.5(16)\text{\AA}^3$ , are based upon the refinement of the XYZ-centroids of 2876 reflections above  $20\sigma(I)$  with  $2.310^\circ < \theta < 27.366^\circ$ . Analysis of the data showed negligible decay during data collection. Data were corrected for absorption effects using the multiscan technique (SADABS). The ratio of minimum to maximum apparent transmission was 0.3513.

The structure was solved and refined using the Bruker SHELXTL (Version 6.1) Software Package, using the space group P-1, with  $Z = 2$  for the formula unit,  $C_{32.50}H_{28.5}N$ . The final anisotropic full-matrix least-squares refinement on  $F^2$  with 310 variables converged at  $R1 = 7.21\%$ , for the observed data and  $wR2 = 24.36\%$  for all data. The goodness-of-fit was 0.958. The largest peak on the final difference map was  $0.571\text{ e}^-/\text{\AA}^3$  and the largest hole was  $-0.190\text{ e}^-/\text{\AA}^3$ . Based on the final model, the calculated density of the crystal is  $1.186\text{ g/cm}^3$  and  $F(000)$  amounts to 462 electrons.

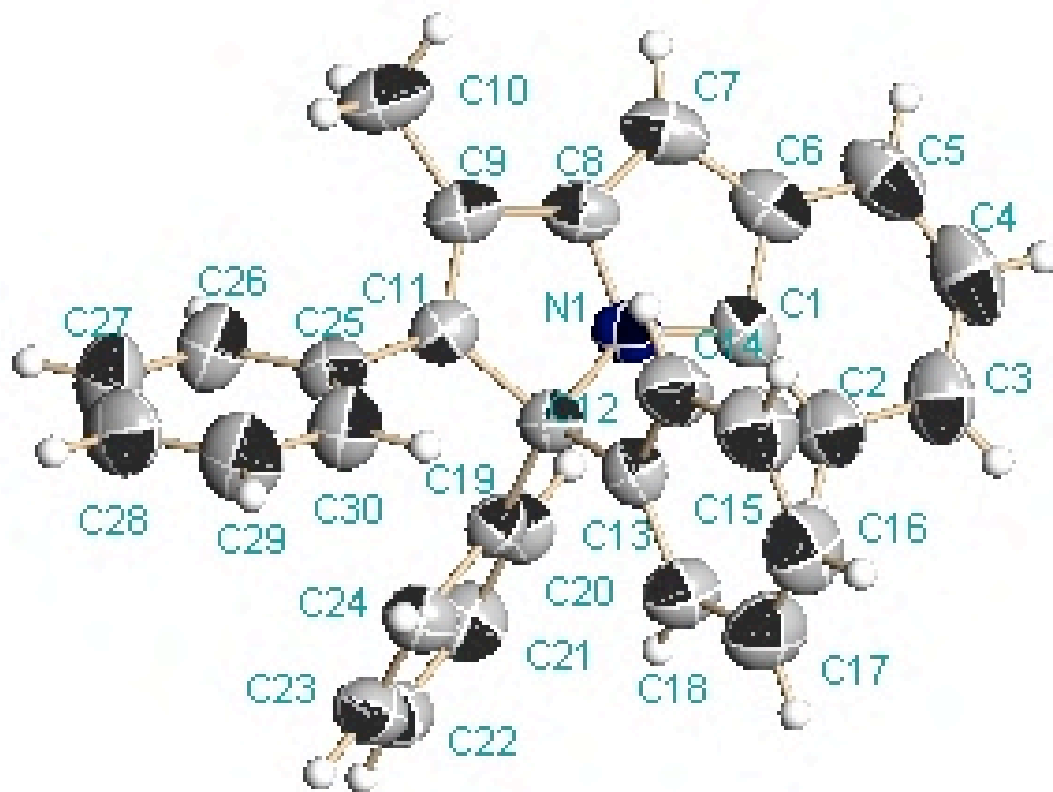



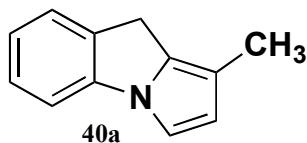

A yellow plate shaped crystal of **40a** (C<sub>12</sub>H<sub>11</sub>N) with approximate dimensions 0.10 x 0.30 x 0.40 mm, was used for the X-ray crystallographic analysis. The X-ray intensity data were measured at 108(2) K, cooled by Rigaku-MSX X-Stream 2000, on a Bruker SMART APEX CCD area detector system equipped with a graphite monochromator and a MoK $\alpha$  fine-focus sealed tube ( $\lambda = 0.71073\text{\AA}$ ) operated at 1600 watts power (50 kV, 32 mA). The detector was placed at a distance of 5.8 cm from the crystal. A total of 1850 frames were collected with a scan width of 0.3° in  $\omega$  and an exposure time of 20 seconds/frame. The total data collection time was about 12 hours. The frames were integrated with the Bruker SAINT software package using a narrow-frame integration algorithm. The integration of the data using a Monoclinic unit cell yielded a total of 5358 reflections to a maximum  $\theta$  angle of 28.28° (0.90 Å resolution), of which 2066 were independent, completeness = 94.9 %,  $R_{\text{int}} = 0.0178$ ,  $R_{\text{sig}} = 0.0245$  and 1729 were greater than  $2\sigma(I)$ . The final cell constants:  $a = 11.907(4)\text{\AA}$ ,  $b = 5.6848(16)\text{\AA}$ ,  $c = 12.950(4)\text{\AA}$ ,  $\alpha = 90^\circ$ ,  $\beta = 92.517(5)^\circ$ ,  $\gamma = 90^\circ$ , volume =  $875.7(4)\text{\AA}^3$ , are based upon the refinement of the XYZ-centroids of 2113 reflections above  $20\sigma(I)$  with  $2.274^\circ < \theta < 28.242^\circ$ . Analysis of the data showed negligible decay during data collection. Data were corrected for absorption effects using the multiscan technique (SADABS). The ratio of minimum to maximum apparent transmission was 0.849448. The structure was solved and refined using the Bruker SHELXTL (Version 6.1) Software Package, using the space group P2(1)/n, with  $Z = 4$  for the formula unit, C<sub>12</sub>H<sub>11</sub>N. The final anisotropic full-matrix least-squares refinement on  $F^2$  with 119 variables converged at  $R1 = 5.17\%$ , for the observed data and  $wR2 = 13.90\%$  for all data. The goodness-of-fit was 1.072. The largest peak on the final difference map was  $0.403\text{ e}^-/\text{\AA}^3$  and the largest hole was  $-0.249\text{ e}^-/\text{\AA}^3$ . Based on the final model, the calculated density of the crystal is  $1.283\text{ g/cm}^3$  and  $F(000)$  amounts to 360 electrons.

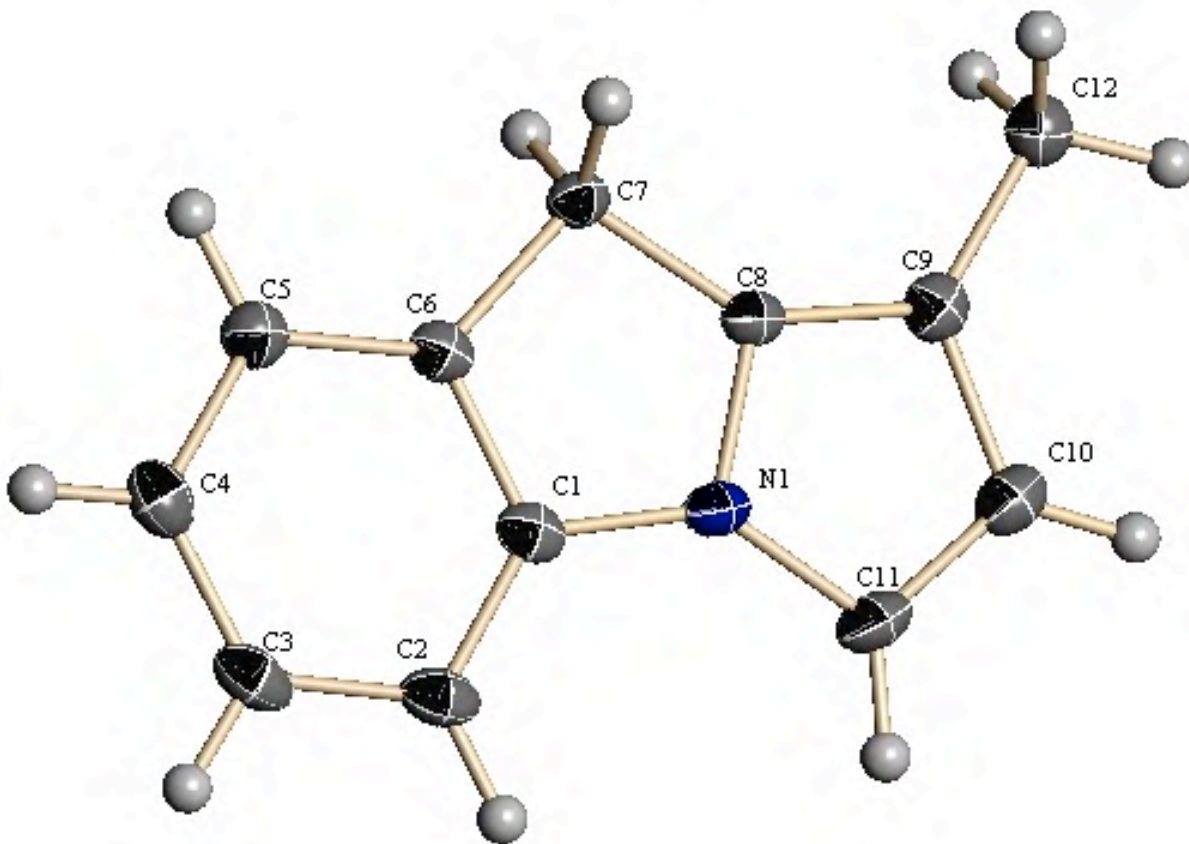

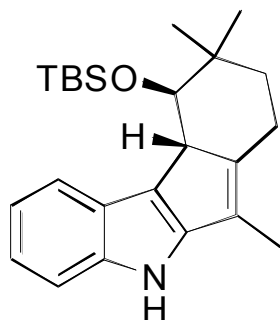

A colorless block shaped crystal of **42b** (C<sub>24</sub>H<sub>35</sub>NOSi) with approximate dimensions 0.06 x 0.15 x 0.20 mm, was used for the X-ray crystallographic analysis. The X-ray intensity data were measured at 128(2) K, cooled by Rigaku-MSX X-Stream 2000, on a Bruker SMART APEX CCD area detector system equipped with a graphite monochromator and a MoK $\alpha$  fine-focus sealed tube ( $\lambda = 0.71073\text{\AA}$ ) operated at 1600 watts power (50 kV, 32 mA). The detector was placed at a distance of 5.8 cm from the crystal. A total of 1850 frames were collected with a scan width of 0.3° in  $\omega$  and an exposure time of 10 seconds/frame. The total data collection time was about 8 hours. The frames were integrated with the Bruker SAINT software package using a narrow-frame integration algorithm. The integration of the data using a Triclinic unit cell yielded a total of 10873 reflections to a maximum  $\theta$  angle of 28.34° (0.90 Å resolution), of which 11043 were independent, completeness = 94.9 %,  $R_{\text{int}} = 0.0536$ ,  $R_{\text{sig}} = 0.1644$  and 5107 were greater than  $2\sigma(I)$ . The final cell constants:  $a = 9.437(8)\text{\AA}$ ,  $b = 13.537(9)\text{\AA}$ ,  $c = 19.104(9)\text{\AA}$ ,  $\alpha = 101.43(4)^\circ$ ,  $\beta = 97.13(4)^\circ$ ,  $\gamma = 99.38(4)^\circ$ , volume =  $2328.0(26)\text{\AA}^3$ , are based upon the refinement of the XYZ-centroids of 1755 reflections above  $20\sigma(I)$  with  $2.230^\circ < \theta < 28.348^\circ$ . Analysis of the data showed negligible decay during data collection. Data were corrected for absorption effects using the multiscan technique (SADABS). The ratio of minimum to maximum apparent transmission was 0.069. The structure was solved and refined using the Bruker SHELXTL (Version 6.1) Software Package, using the space group P-1, with  $Z = 2$  for the formula unit, C<sub>48</sub> H<sub>70</sub> N<sub>2</sub> O<sub>2</sub> Si<sub>2</sub>. The final anisotropic full-matrix least-squares refinement on  $F^2$  with 503 variables converged at  $R1 = 10.20\%$ , for the observed data and  $wR2 = 30.66\%$  for all data. The goodness-of-fit was 0.984. The largest peak on the final difference map was  $0.388\text{ e}^-/\text{\AA}^3$  and the largest hole was  $-0.724\text{ e}^-/\text{\AA}^3$ . Based on the final model, the calculated density of the crystal is  $1.088\text{ g/cm}^3$  and  $F(000)$  amounts to 832 electrons.

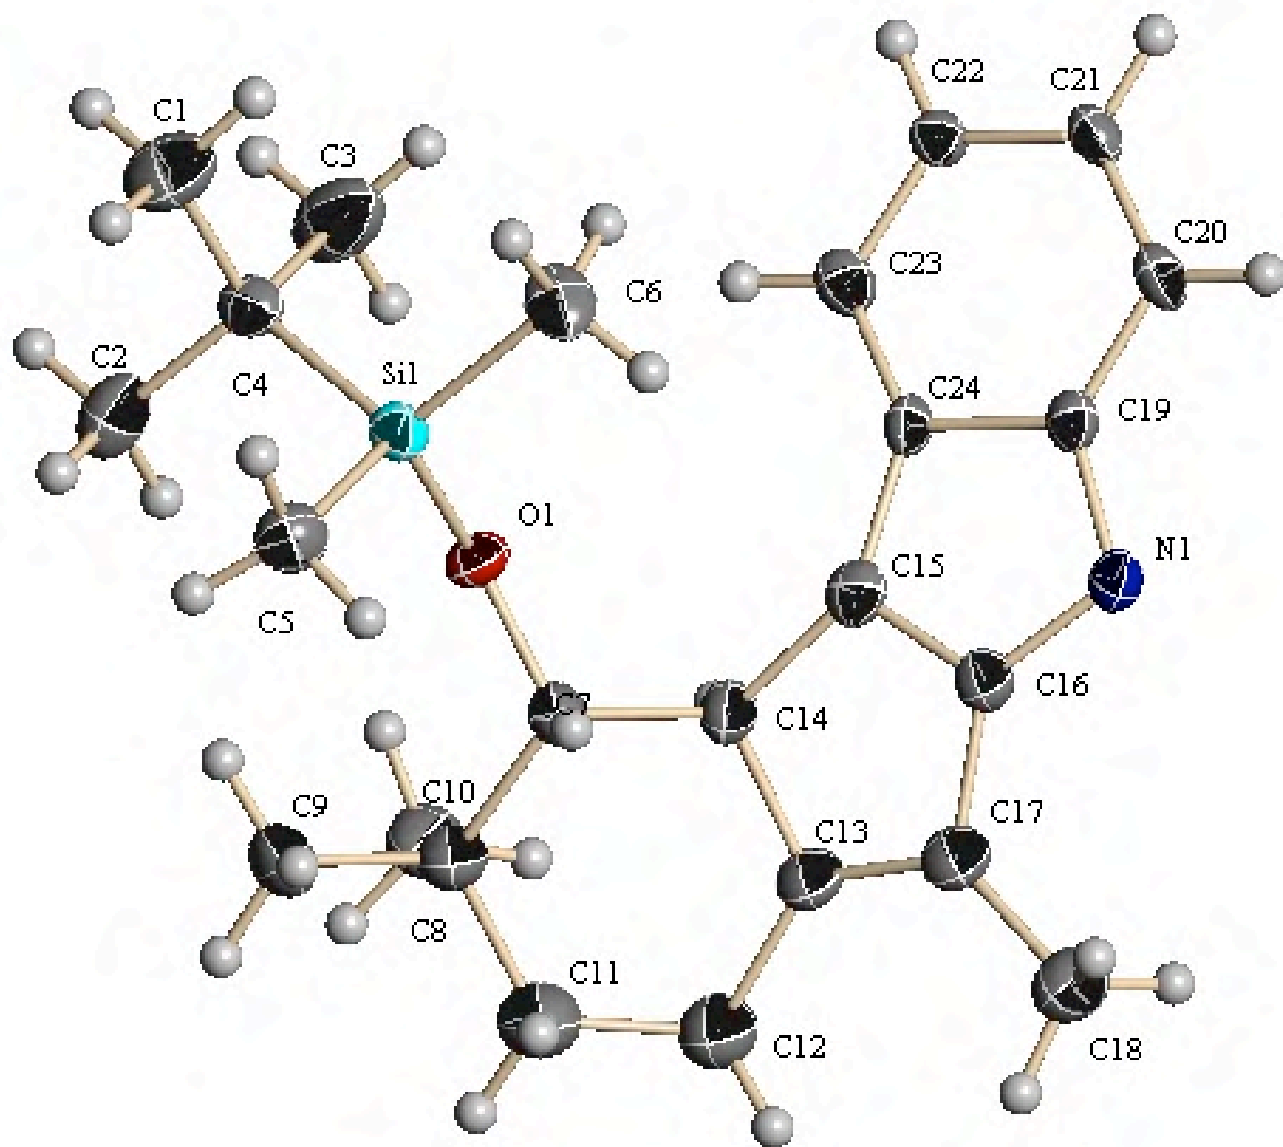

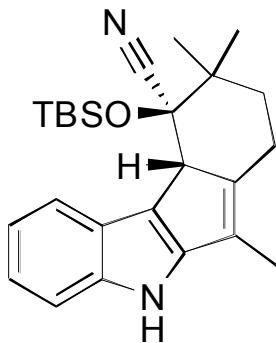

A colorless block shaped crystal of **42d** ( $C_{25}H_{34}N_2OSi$ ) with approximate dimensions 0.20 x 0.30 x 0.40 mm, was used for the X-ray crystallographic analysis. The X-ray intensity data were measured at 129(2) K, cooled by Rigaku-MSX X-Stream 2000, on a Bruker SMART APEX CCD area detector system equipped with a graphite monochromator and a MoK $\alpha$  fine-focus sealed tube ( $\lambda = 0.71073\text{\AA}$ ) operated at 1600 watts power (50 kV, 32 mA). The detector was placed at a distance of 5.8 cm from the crystal. A total of 1850 frames were collected with a scan width of  $0.3^\circ$  in  $\omega$  and an exposure time of 5 seconds/frame. The total data collection time was about 6 hours. The frames were integrated with the Bruker SAINT software package using a narrow-frame integration algorithm. The integration of the data using a Triclinic unit cell yielded a total of 11778 reflections to a maximum  $\theta$  angle of  $28.34^\circ$  ( $0.90\text{\AA}$  resolution), of which 5913 were independent, completeness = 97.7%,  $R_{\text{int}} = 0.0152$ ,  $R_{\text{sig}} = 0.0250$  and 4820 were greater than  $2\sigma(I)$ . The final cell constants:  $a = 9.779(3)\text{\AA}$ ,  $b = 10.939(3)\text{\AA}$ ,  $c = 11.635(4)\text{\AA}$ ,  $\alpha = 89.483(6)^\circ$ ,  $\beta = 77.658(5)^\circ$ ,  $\gamma = 85.916(5)^\circ$ , volume =  $1212.8(7)\text{\AA}^3$ , are based upon the refinement of the XYZ-centroids of 4583 reflections above  $20\sigma(I)$  with  $2.137^\circ < \theta < 27.994^\circ$ . Analysis of the data showed negligible decay during data collection. Data were corrected for absorption effects using the multiscan technique (SADABS). The ratio of minimum to maximum apparent transmission was 0.8805. The structure was solved and refined using the Bruker SHELXTL (Version 6.1) Software Package, using the space group P-1, with  $Z = 2$  for the formula unit,  $C_{25}H_{34}N_2OSi$ . The final anisotropic full-matrix least-squares refinement on  $F^2$  with 270 variables converged at  $R1 = 4.77\%$ , for the observed data and  $wR2 = 14.44\%$  for all data. The goodness-of-fit was 1.037. The largest peak on the final difference map was  $0.384\text{ e}^-/\text{\AA}^3$  and the largest hole was  $-0.174\text{ e}^-/\text{\AA}^3$ . Based on the final model, the calculated density of the crystal is  $1.113\text{ g/cm}^3$  and  $F(000)$  amounts to 440 electrons.

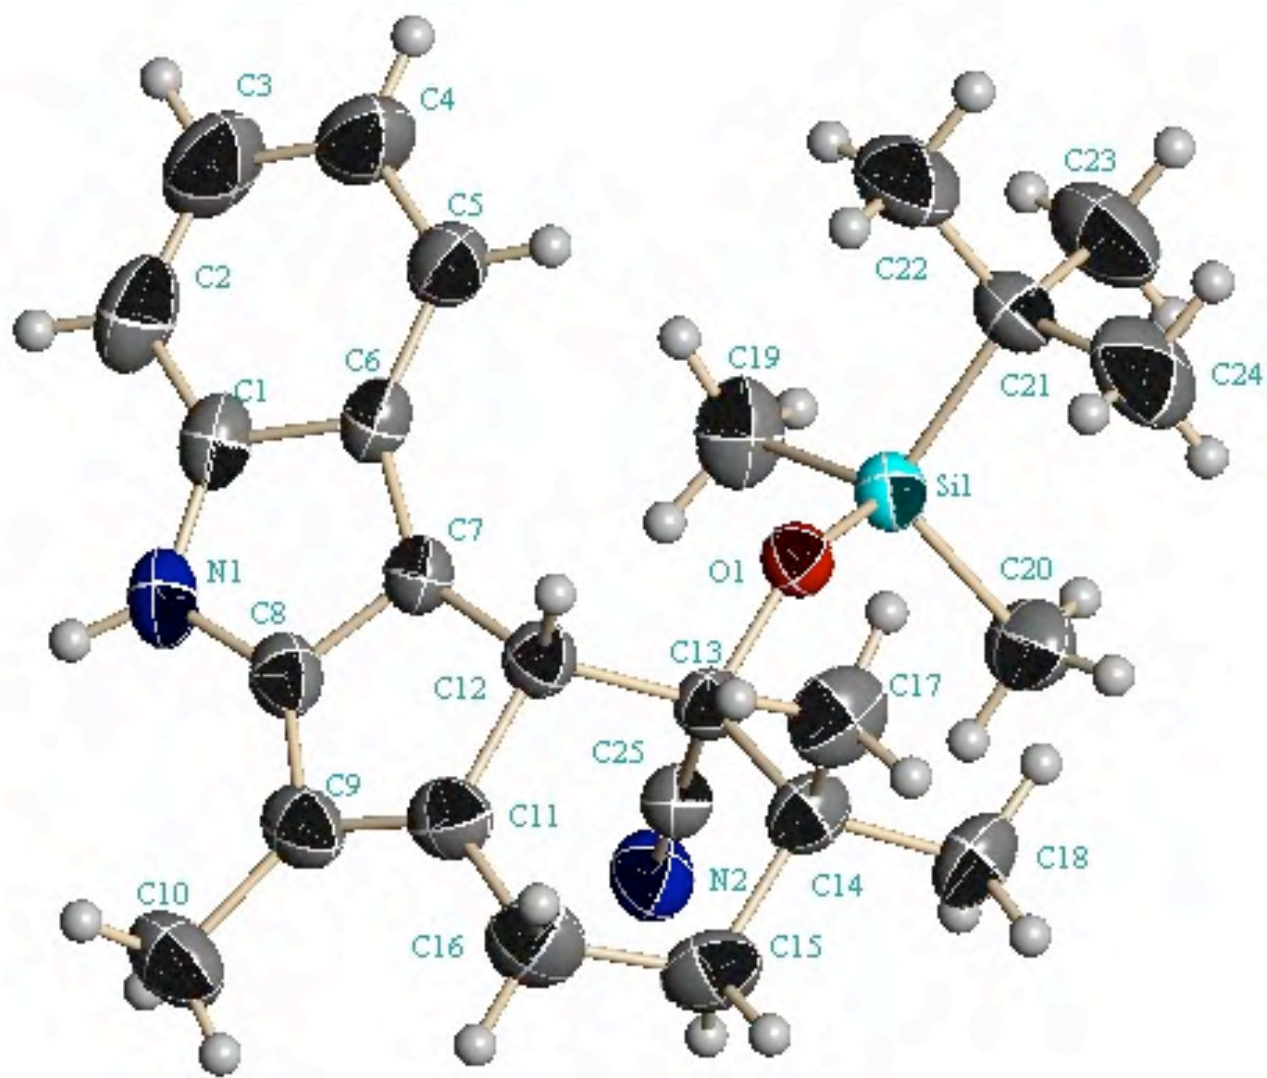

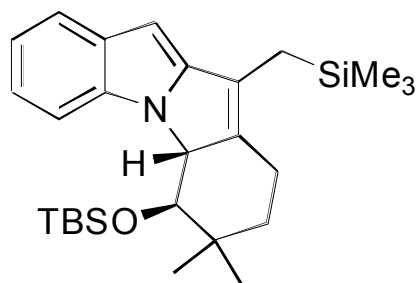

A colorless block shaped crystal of **43e** ( $C_{27}H_{43}NOSi_2$ ) with approximate dimensions 0.13 x 0.18 x 0.25 mm, was used for the X-ray crystallographic analysis. The X-ray intensity data were measured at 123(2)K, cooled by Rigaku-MSX X-Stream 2000, on a Bruker SMART APEX CCD area detector system equipped with a graphite monochromator and a MoK $\alpha$  fine-focus sealed tube ( $\lambda = 0.71073\text{\AA}$ ) operated at 1600 watts power (50 kV, 32 mA). The detector was placed at a distance of 5.8 cm from the crystal.

A total of 1850 frames were collected with a scan width of  $0.3^\circ$  in  $\omega$  and an exposure time of 10 seconds/frame. The total data collection time was about 8 hours. The frames were integrated with the Bruker SAINT software package using a narrow-frame integration algorithm. The integration of the data using a Monoclinic unit cell yielded a total of 24148 reflections to a maximum  $\theta$  angle of  $29.13^\circ$  ( $0.90\text{\AA}$  resolution), of which 7027 were independent, completeness = 94.3%,  $R_{\text{int}} = 0.0910$ ,  $R_{\text{sig}} = 0.0928$  and 4448 were greater than  $2\sigma(I)$ . The final cell constants:  $a = 11.869(2)\text{\AA}$ ,  $b = 10.874(2)\text{\AA}$ ,  $c = 22.010(4)\text{\AA}$ ,  $\alpha = 90^\circ$ ,  $\beta = 93.52(3)^\circ$ ,  $\gamma = 90^\circ$ , volume =  $2835.2(10)\text{\AA}^3$ , are based upon the refinement of the XYZ-centroids of 9371 reflections above  $20\sigma(I)$  with  $2.534^\circ < \theta < 28.570^\circ$ . Analysis of the data showed negligible decay during data collection. Data were corrected for absorption effects using the multiscan technique (SADABS). The ratio of minimum to maximum apparent transmission was 0.4338. The structure was solved and refined using the Bruker SHELXTL (Version 6.1) Software Package, using the space group P2(1)/c, with  $Z = 4$  for the formula unit,  $C_{27}H_{43}NOSi_2$ . The final anisotropic full-matrix least-squares refinement on  $F^2$  with 290 variables converged at  $R1 = 7.38\%$ , for the observed data and  $wR2 = 19.39\%$  for all data. The goodness-of-fit was 1.022. The largest peak on the final difference map was  $0.681\text{ e}^-/\text{\AA}^3$  and the largest hole was  $-0.620\text{ e}^-/\text{\AA}^3$ . Based on the final model, the calculated density of the crystal is  $1.063\text{ g/cm}^3$  and  $F(000)$  amounts to 992 electrons.

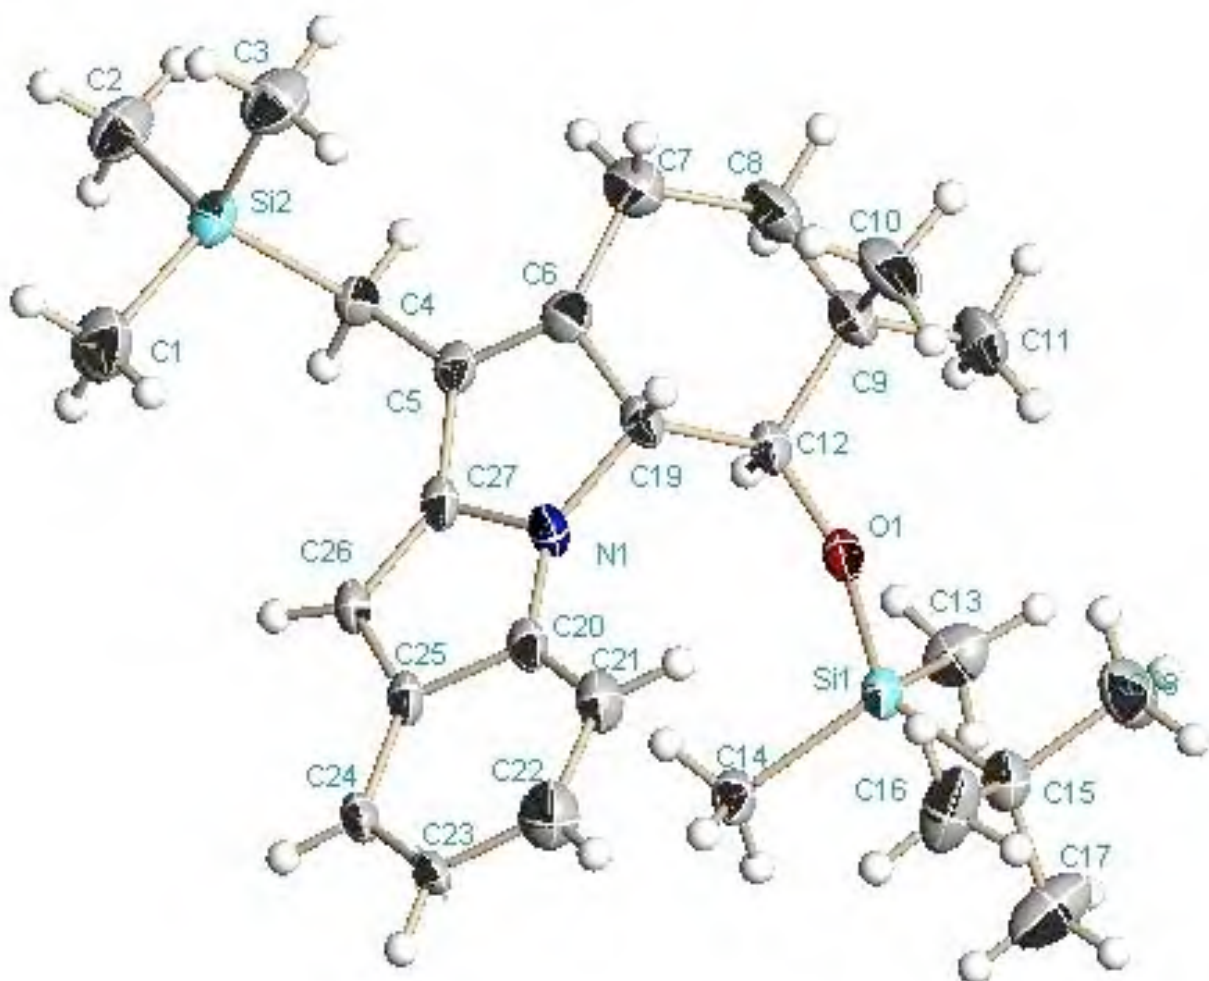



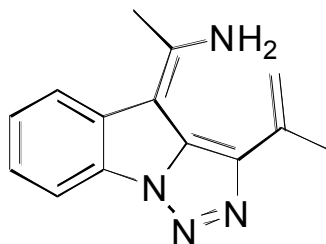

A colorless plate shaped crystal of **54** ( $C_{14}H_{14}N_4$ ) with approximate dimensions 0.09 x 0.20 x 0.28 mm, was used for the X-ray crystallographic analysis. The X-ray intensity data were measured at 123(2) K, cooled by Rigaku-MSX X-Stream 2000, on a Bruker SMART APEX CCD area detector system equipped with a graphite monochromator and a MoK $\alpha$  fine-focus sealed tube ( $\lambda = 0.71073 \text{ \AA}$ ) operated at 1600 watts power (50 kV, 32 mA). The detector was placed at a distance of 5.8 cm from the crystal. A total of 1850 frames were collected with a scan width of  $0.3^\circ$  in  $\omega$  and an exposure time of 10 seconds/frame. The total data collection time was about 8 hours. The frames were integrated with the Bruker SAINT software package using a narrow-frame integration algorithm. The integration of the data using a Monoclinic unit cell yielded a total of 20935 reflections to a maximum  $\theta$  angle of  $28.33^\circ$  ( $0.90 \text{ \AA}$  resolution), of which 6098 were independent, completeness = 98.6%,  $R_{\text{int}} = 0.0440$ ,  $R_{\text{sig}} = 0.0492$  and 3664 were greater than  $2\sigma(I)$ . The final cell constants:  $a = 9.8894(16) \text{ \AA}$ ,  $b = 21.213(3) \text{ \AA}$ ,  $c = 11.8512(19) \text{ \AA}$ ,  $\alpha = 90^\circ$ ,  $\beta = 93.758(3)^\circ$ ,  $\gamma = 90^\circ$ , volume =  $2480.9(7) \text{ \AA}^3$ , are based upon the refinement of the XYZ-centroids of 5397 reflections above  $20\sigma(I)$  with  $2.275^\circ < \theta < 28.319^\circ$ . Analysis of the data showed negligible decay during data collection. Data were corrected for absorption effects using the multiscan technique (SADABS). The ratio of minimum to maximum apparent transmission was 0.8135. The structure was solved and refined using the Bruker SHELXTL (Version 6.1) Software Package, using the space group P2(1)/c, with  $Z = 8$  for the formula unit,  $C_{14}H_{14}N_4$ . The final anisotropic full-matrix least-squares refinement on  $F^2$  with 329 variables converged at  $R1 = 6.79\%$ , for the observed data and  $wR2 = 19.85\%$  for all data. The goodness-of-fit was 0.963. The largest peak on the final difference map was  $0.201 \text{ e}^-/\text{\AA}^3$  and the largest hole was  $-0.213 \text{ e}^-/\text{\AA}^3$ . Based on the final model, the calculated density of the crystal is  $1.276 \text{ g/cm}^3$  and  $F(000)$  amounts to 1008 electrons.

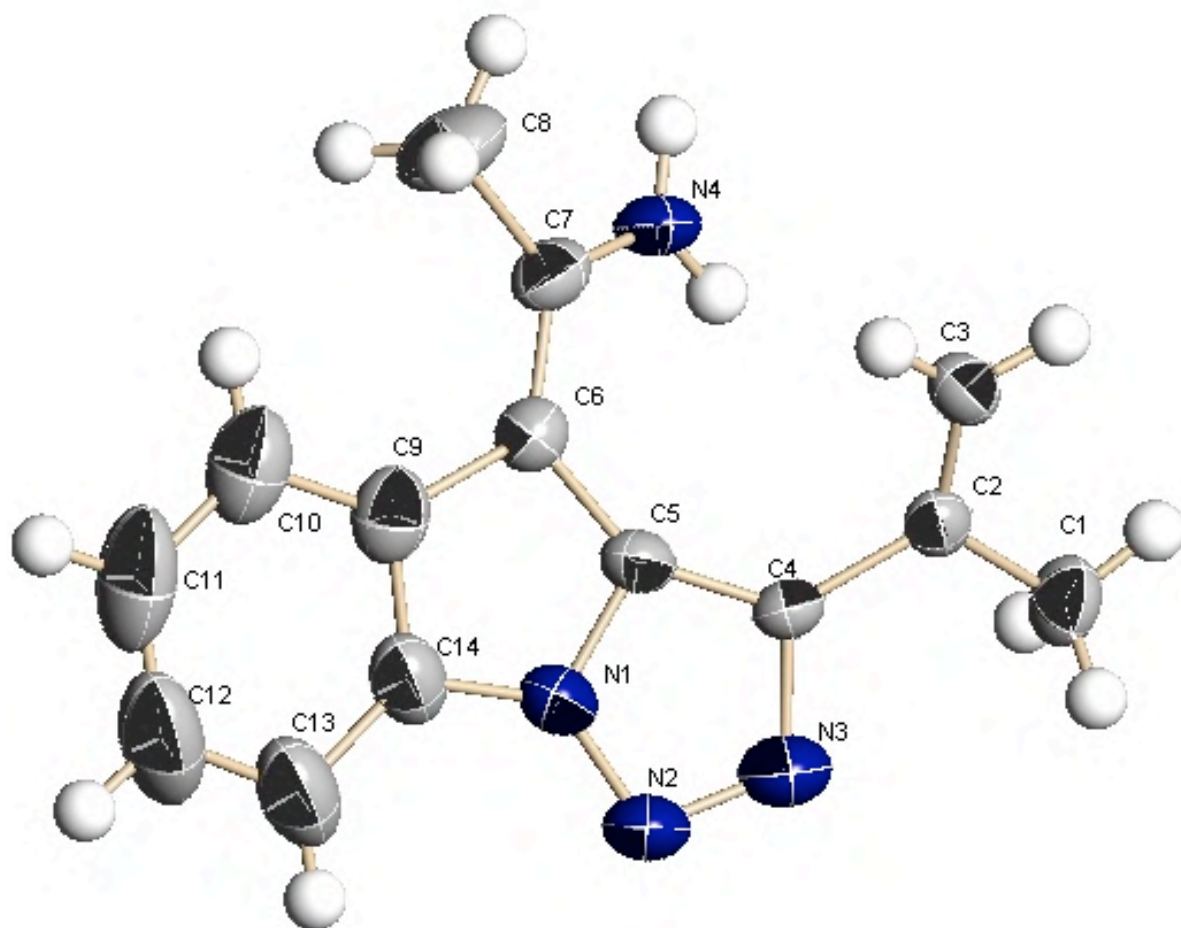

Despite having located a transition state for the **64** → **67**-type transformation in the non-methylated allenyl azide substrate in previous work (see upper diagram of the following Figure),<sup>1</sup> numerous attempts performed to locate the transition state associated to the stepwise N<sub>2</sub> extrusion (**64** → **67**) employing different optimization algorithms failed. Since the introduction of a methyl substituent at the allene terminus did not seem to justify the disappearance of the diradical pathway, we decided to carry out a thorough scan of the potential energy surface. The bond breaking C-N and N-N distances were selected as logical reaction coordinates and multiple constrained geometry optimizations were run in the ranges 1.6 to 2.8 Å for the C-N bond length and 1.3 to 2.0 Å for the N-N bond length, respectively. More than 100 geometry optimization jobs were completed to construct each surface (see Figure below). Due to near degeneracy problems raised in the diradical region associated to the stepwise extrusion, the unrestricted version of the B3LYP functional was employed, and the stability of the final wavefunctions<sup>2</sup> checked for the structures lying in this area (see computational methods for more details). These calculations revealed that the region around the diradical transition state in the des-methyl substrate is almost flat and the channel funneling the stepwise process is remarkably shallow, featuring a very smooth and low hillock separating the higher energy diradical transition state from the much more favorable concerted alternative (see upper diagram of Figure below). The introduction of the methyl substituent further flattens out the diradical area, transforming the hillock into a downhill shoulder and erasing the diradical transition state from the potential energy surface landscape (see lower diagram of the Figure below). Despite the differences exhibited between these surfaces, the same chemistry is expected for both methylated and des-methylated substrates, since the lowest energy pathway to N<sub>2</sub> loss, the concerted mechanism stays unaltered upon methylation.

- (1) López, C. S.; Faza, O. N.; Feldman, K. S.; Iyer, M. R.; Hester, II, D. K. *J. Am. Chem. Soc.* **2007**, *129*, 7638-7646.
- (2) Bauernschmitt, R.; Ahlrichs, R. *J. Chem. Phys.* **1996**, *22*, 9047-9052.

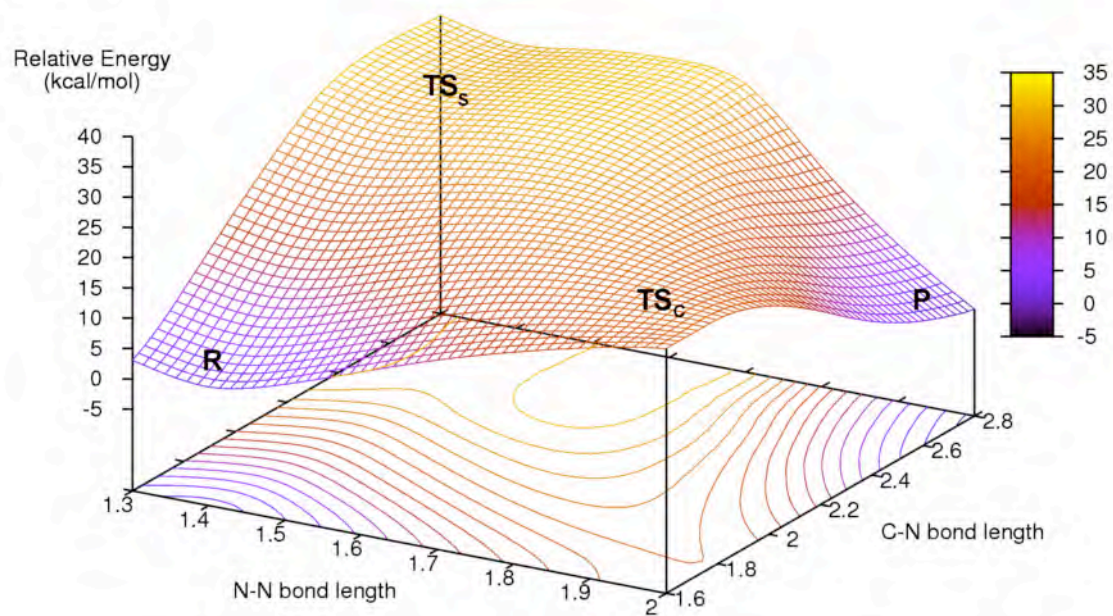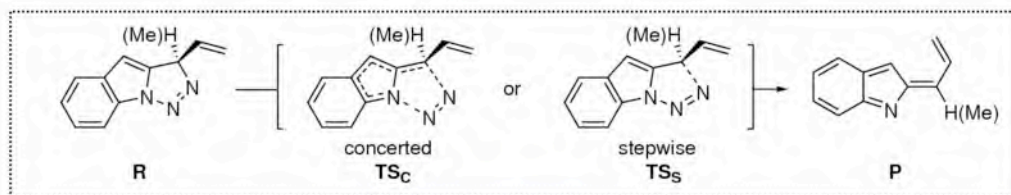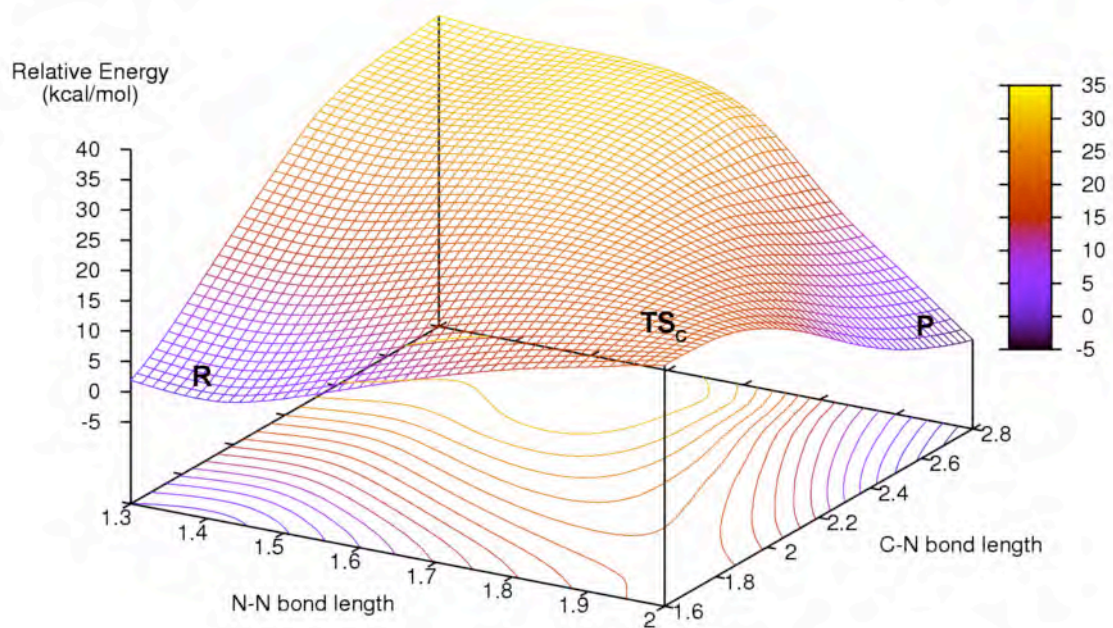

Supplement: NIHMS160342-supplement-data1.pdf [file NIHMS160342-supplement-data1.pdf]
